# Supplementary material for: Genome-wide identification and characterization of NAC genes in Brassica juncea var. tumida
Source: PeerJ. 2021 May 5;9:e11212. doi: 10.7717/peerj.11212 (PMC8106399; doi:10.7717/peerj.11212)
Supplement: Table S1 [file peerj-09-11212-s010.xlsx]

## Sheet: Sheet1
Table S1. Premiers for NAC members selected for qRT-PCR
Gene name	Forward Primer Sequence (5’-3’)	Reverse Primer Sequence (5’-3’)
BjuNAC073	TGGAAGGCTACAGGGAAGGA	GTGTACTCGTGCATCACCCA
BjuNAC240	CCTGGTCTGTCGGTGTTGAA	TCTTTTCCCGTTGCCTTCCA
BjuNAC241	ACCTGATGACTTGCCTGGTC	TCCTTCCCTGTAGCCTTCCA
BjuNAC112	ATACCTTCAACGCCAGCCTC	TCTGCTACGCTTCTTTGCCA
BjuNAC184	TCCCGAAGAATTGCCTGGTC	CAGACCTAGCTGCGTTTGGA
BjuNAC083	GACGGAAGGAAAGAGAGTTGGT	CGAGAGGGTTCAAGGAGACG
BjuNAC223	ACCGCTTTCTGTCATCGCA	ATCTGTTCCGGTGGCTTTCC
BjuNAC006	GCACCAAAAGGCACCAAAAC	AACCTGTTTCTGTGCGCTTG
BjuNAC074	CCAAAGACCGAGGCAAAAGC	GTGACGCAGGAAAACCGATG
BjuNAC295	AGATTCCACCCAACCGAGGA	AGCTTCCATCTCTGCTCGTTG
BjuNAC170	GCCATTCCAACTTTTGCTCCTAC	TAAACTGATGCCCCTGATACGC
BjuNAC178	TCGACTTACCCGACATTGCA	GCATTCTCAAGCTCTCCCCA
BjuNAC146	TTACCCTGCGGATGAGAAACC	GTGGAGTCCGACGTGTCAAA
BjuNAC268	ACCCTGCTGATGAGAAACCG	AGCTGCTCGAATCGTTCTGG
BjuB012485（actin）	ACTGGAATGGTGAAGGCTGG	CCATCCCAACCATGACACCA
