# Supplementary material for: Genome-wide identification and characterization of NAC genes in Brassica juncea var. tumida
Source: PeerJ. 2021 May 5;9:e11212. doi: 10.7717/peerj.11212 (PMC8106399; doi:10.7717/peerj.11212)
Supplement: Table S3 [file peerj-09-11212-s012.xlsx]

## Sheet: NAC genes information
	NAM1		NAM2				Chr-position
ID	start	end	start	end	aa length	chr	start	end	Molecular weight	Theoretical pI
BniB004956	4	281			313	B1	1726652	1728721	35994.2	5.06
BniB005328	7	139			282	B1	317837	318954	32616.2	4.84
BniB017456	6	130			301	B1	6629039	6630661	34044.9	6.68
BniB024746	56	196			351	B1	17278066	17279914	38684.4	4.81
BniB024817	21	145			327	B1	16422712	16424035	37028.7	7.06
BniB031193	7	132			143	B1	9122433	9123106	16725	9.21
BniB031203	19	147			321	B1	9301708	9304436	35887.2	5.45
BniB034809	6	130			295	B1	25702855	25704880	33600.6	7.03
BniB035085	29	155			438	B1	28831909	28833997	49425	5.52
BniB035086	23	149			429	B1	28828222	28830378	48380.7	5.4
BniB035087	14	142			537	B1	28824775	28826857	60197.9	4.35
BniB035144	26	154			#N/A	B1	27814970	27816265	35568.6	8.58
BniB035207	19	145			299	B1	27029492	27030836	33315.4	7.93
BniB035220	15	139			284	B1	26951228	26952262	32268	8.55
BniB035221	18	144			358	B1	26939781	26941209	39382.9	7.53
BniB035298	7	133			248	B1	26127890	26129264	28438.4	4.72
BniB036210	22	150			303	B1	12290784	12292408	34888.1	9.14
BniB036211	19	143			279	B1	12256359	12258421	31977.8	9.46
BniB036281	21	147			307	B1	11384516	11386053	34192.4	8.43
BniB036292	18	144			344	B1	11287204	11288811	38082.6	8.75
BniB040493	7	133			480	B1	30582704	30585090	55297	5.22
BniB040774	7	133			281	B1	29373540	29375251	32467.1	8.62
BniB041121	372	498			758	B1	12723109	12727869	85927.4	6.69
BniB041122	22	148			426	B1	12728760	12731348	47993.2	5.38
BniB044379	17	134			530	B1	22321003	22323756	60486.3	6.21
BniB044485	52	177	231	364	392	B1	22204129	22205307	46658.9	6.09
BniB044547	11	140			355	B1	30149379	30150771	40678.2	6.87
BniB044548	21	146			342	B1	30158340	30159708	38111.4	6.51
BniB045768	10	137			455	B1	19165663	19167612	51258.3	5.4
BniB045828	8	135			376	B1	19965653	19968314	42739.2	8.62
BniB045881	4	118			188	B1	20598378	20599720	21523.6	4.54
BniB047130	19	144			340	B1	30830982	30832257	38318.1	5.13
BniB006326	7	133			433	B2	16685156	16687766	49021.6	6.76
BniB007771	18	144			367	B2	26178546	26180267	40674	8.63
BniB008382	9	133			286	B2	35147283	35148429	32732.5	8.72
BniB008985	11	134			259	B2	5043008	5043954	29487.5	8.88
BniB012771	48	195			329	B2	41446730	41448390	35931.4	8.11
BniB014394	5	135			423	B2	19802175	19805532	48117.8	6.63
BniB015922	10	137			410	B2	2668319	2670512	47370.5	8.38
BniB018423	60	200			301	B2	39981525	39983116	33524.5	9.25
BniB018462	48	189			363	B2	40314265	40316834	39784	7.42
BniB018728	11	151			344	B2	39992719	39996139	39445.7	5.8
BniB018779	15	139			299	B2	39549582	39550683	33549.3	8.28
BniB023362	20	151			320	B2	30796214	30797517	35851.3	4.53
BniB023429	7	133			399	B2	30125600	30127173	44222	4.62
BniB023433	8	131			277	B2	30113448	30114454	31540.2	6.79
BniB023649	10	137			560	B2	28998026	29000164	62635.8	4.35
BniB023716	18	142			318	B2	29803470	29804646	36279.8	9.15
BniB023847	15	138			249	B2	31369984	31370904	28373.6	9.53
BniB029013	24	183			358	B2	22877038	22878114	41583.9	4.83
BniB036526	22	149			319	B2	4587544	4589383	36345.5	6.45
BniB045215	11	138			372	B2	42657703	42659671	43125	6.2
BniB005531	14	164			465	B3	30059550	30060947	53793.1	4.67
BniB011874	10	137			341	B3	11636906	11638474	38899	7.35
BniB026268	32	156			191	B3	18274306	18274881	22588.6	5.36
BniB026365	38	163			358	B3	38960727	38962589	39932.1	4.91
BniB026921	259	386			698	B3	7402179	7407940	78251.8	7.3
BniB027750	10	137			341	B3	23582450	23584041	39067.3	7.21
BniB028982	7	133			400	B3	42957351	42958969	44777.6	4.59
BniB028985	4	127			272	B3	42976908	42977914	30810.4	5.49
BniB029665	12	139			328	B3	208500	209828	37581.3	6.05
BniB029854	45	173			281	B3	1535545	1536558	32118.7	6.63
BniB030338	205	333			373	B3	1525459	1527178	43348.7	4.64
BniB031842	15	138			248	B3	42065707	42066823	28139.4	9.83
BniB032681	16	140			312	B3	27774394	27776623	35995.5	7.55
BniB032755	1	107			149	B3	28770704	28771153	17568.8	9.22
BniB041017	10	136			566	B3	43832563	43834845	62760.8	4.27
BniB042268	22	147			333	B3	40870267	40871787	37828.6	6.6
BniB042292	6	98			466	B3	41095645	41098172	53225	6.79
BniB042356	57	194			281	B3	41726391	41728382	31939.9	5.24
BniB042381	16	137			210	B3	41834624	41835484	24155.3	9.37
BniB004155	8	135			350	B4	7015570	7016764	40249.3	5.12
BniB004248	4	118			190	B4	7995828	8000764	21739.8	4.6
BniB004525	7	133			350	B4	7802745	7804045	39426.7	4.37
BniB004536	32	143			188	B4	7691217	7692200	21614.9	4.32
BniB004855	9	140			200	B4	27622025	27622768	23447.8	4.21
BniB004891	4	136			244	B4	27252400	27253134	28327.1	9.59
BniB004953	21	145			288	B4	27991675	27992804	32941	5.45
BniB006291	17	144			350	B4	12069743	12071681	39361	5.96
BniB007256	12	139			332	B4	29526768	29527995	37845.3	6.11
BniB010178	6	140			509	B4	22277084	22278613	59131.2	4.27
BniB010204	6	140			512	B4	22466132	22467670	59493.5	4.25
BniB012373	14	141			437	B4	6622883	6624628	49039.9	7.76
BniB016220	15	134			253	B4	2444406	2445370	29256.7	9.49
BniB019396	167	293			335	B4	25994801	25996275	38669.6	4.5
BniB019533	24	183			193	B4	26044977	26045558	22215.8	5.09
BniB022760	12	139			326	B4	24335222	24337617	37188.6	6.42
BniB022848	18	146			355	B4	23541578	23543370	40954	7.31
BniB028052	17	143			335	B4	28041961	28043185	38028.1	8.41
BniB040195	18	146			362	B4	32510935	32512835	41512.6	7.18
BniB041900	17	144			363	B4	12125446	12127362	40861.2	6.19
BniB046995	8	131			266	B4	10863139	10864154	30300	6.91
BniB047040	4	118			188	B4	11042655	11044125	21570.7	4.66
BniB048512	15	140			347	B4	10165666	10166935	39085.4	5.8
BniB048538	119	246			400	B4	10607736	10612802	45929	8.43
BniB005174	31	157			456	B5	2612050	2614479	51250.9	6.16
BniB006222	16	140			282	B5	17240900	17242083	32602.7	6.01
BniB008334	35	161			326	B5	4821080	4822530	36293.1	8.19
BniB008812	2	107			162	B5	21553250	21553870	18817.8	4.29
BniB008872	15	143			241	B5	5016827	5018008	26798.1	4.94
BniB008873	19	145			358	B5	5030911	5032333	39156.8	7.99
BniB010712	25	153			305	B5	3562198	3563774	35337.4	7.3
BniB010715	253	377			506	B5	3599750	3603403	58688.2	8.37
BniB011492	8	135			335	B5	32632044	32633411	38923.1	5.97
BniB014040	25	153			186	B5	3687957	3688850	21417.1	9.67
BniB017244	16	139			267	B5	37029107	37030905	31082.8	7.32
BniB020166	16	136			257	B5	30797906	30798842	29561.3	8.72
BniB031639	18	142			280	B5	36786740	36788767	32448.2	8.22
BniB032464	11	139			350	B5	455243	456697	40133.7	7.34
BniB032466	21	146			345	B5	446439	447829	38667.3	7.42
BniB038893	17	143			317	B5	25250883	25253106	35912	8.58
BniB039382	6	130			306	B5	6771834	6773671	34796	7.99
BniB043851	56	183			464	B5	35943954	35945348	53211.4	4.55
BniB043867	115	242			525	B5	35960602	35962179	59587.5	4.84
BniB048832	7	133			244	B5	6250546	6252167	27960.9	4.65
BniB003279	17	141			319	B6	30505073	30506251	36197.8	8.55
BniB004699	77	216			314	B6	13841101	13842564	35518.6	7.6
BniB009756	8	135			395	B6	18539492	18540867	45726.4	6.27
BniB009785	7	134			285	B6	18938773	18939809	32961.5	8.58
BniB011001	14	139			319	B6	22652349	22653752	35814.9	9
BniB011117	8	135			405	B6	21909304	21911119	46647.2	6.32
BniB027173	54	179			407	B6	28927308	28929987	46306.9	6.45
BniB028875	7	134			295	B6	28018947	28020084	33797.4	5.98
BniB029360	5	129			268	B6	25331465	25332538	29867.6	8.55
BniB029481	43	168			390	B6	26543507	26545934	44492.8	6.15
BniB034068	15	139			314	B6	11086082	11087218	35294	6.8
BniB034400	8	143			380	B6	16926296	16928088	38682.6	4.84
BniB037742	8	135			368	B6	32077758	32078964	42270.2	4.84
BniB038652	9	136			319	B6	8340654	8342708	36430.5	7.61
BniB005418	18	146			350	B7	21702226	21704671	40424.4	7.16
BniB010534	8	135			325	B7	15225191	15226769	37405.2	6.39
BniB014418	7	134			361	B7	638422	640513	42108.8	5.66
BniB015428	8	135			336	B7	40156695	40158077	39267.3	6.02
BniB015762	11	151			348	B7	37280690	37283917	40040.5	6.28
BniB031957	8	132			268	B7	16899179	16900157	31090.1	6.88
BniB033457	56	189			455	B7	27362240	27364540	51168.1	4.51
BniB035526	11	135			271	B7	19557978	19558975	31359.4	6.86
BniB037187	16	142			408	B7	16631734	16633568	46456.6	7.35
BniB039752	16	141			515	B7	26645039	26646847	57192.1	5.4
BniB042763	1072	1202			1385	B7	24262914	24277810	157179	7.2
BniB042764	4	133			417	B7	24250858	24253800	46924.8	4.81
BniB042765	6	141			367	B7	24243564	24245061	37814.6	4.78
BniB042766	4	148			430	B7	24214466	24217823	48093.3	6.44
BniB042767	4	133			240	B7	24209119	24210161	27847.1	6.86
BniB042768	4	133			513	B7	24191476	24199929	58300.9	6.54
BniB042769	4	143			481	B7	24181662	24184420	55433.6	5.27
BniB042770	6	138			235	B7	24176945	24178056	26707.7	7.73
BniB042771	4	134			396	B7	24166958	24168503	45198.5	7.99
BniB042772	4	123			423	B7	24147247	24149173	48571.6	5.74
BniB042773	4	137			246	B7	24141313	24142487	28330.3	6.36
BniB042775	4	134			330	B7	24123589	24124995	37147.6	5.13
BniB042776	5	136			354	B7	24090964	24092868	40649.3	6.02
BniB042777	4	137			181	B7	24086684	24087815	20989.3	9.24
BniB042802	7	130			292	B7	23805350	23806393	32966.2	6.93
BniB042845	16	142			652	B7	23141707	23144186	73404.8	6.16
BniB042852	17	144			357	B7	23061639	23063799	41429.1	6.35
BniB042960	13	139			579	B7	23287992	23290464	64552.2	4.86
BniB042961	17	143			525	B7	23291056	23293232	58576.8	4.75
BniB043023	2	138			231	B7	24118869	24120114	26695.7	7.42
BniB045377	23	150			335	B7	11458308	11460394	38031.4	6.27
BniB045438	22	147			336	B7	8624449	8625855	38326.8	6.29
BniB048311	17	142			418	B7	34578543	34580598	47699.7	6.65
BniB000325	17	141			334	B8	41330181	41331374	37894.6	7.91
BniB001319	10	136			571	B8	29853720	29856013	63934.2	4.25
BniB001465	18	142			316	B8	28699703	28700869	36082.7	9.19
BniB001635	17	145			330	B8	27610742	27612124	37759.2	7
BniB001711	7	133			436	B8	28280176	28281851	48276.4	4.66
BniB001717	8	131			278	B8	28300713	28301731	31671.3	6.53
BniB002049	32	158	213	346	374	B8	31725561	31726685	44563.6	6.6
BniB003716	7	133			492	B8	25295980	25298657	56576.8	5.71
BniB011774	7	134			281	B8	3721231	3722237	32446.1	8.82
BniB013914	15	138			249	B8	26873773	26874715	28408.8	9.52
BniB013946	16	141			212	B8	26601213	26602093	23618.5	8.84
BniB017177	17	143			317	B8	21258467	21260881	35841	9.46
BniB017786	7	134			290	B8	34577046	34578184	33025.5	5.06
BniB017879	43	168			405	B8	35759282	35762083	46146.4	6.42
BniB018358	3	100	146	282	301	B8	18988625	18989530	34841.1	9.04
BniB018882	10	134			140	B8	43465041	43465924	16213.8	4.05
BniB019142	9	137			292	B8	38044697	38045842	33387.1	5.84
BniB025157	3	129			463	B8	37898727	37900118	52940.9	10.14
BniB025429	22	146			318	B8	37542313	37543446	35927.6	6.32
BniB033340	22	147			336	B8	24564805	24566307	38135	6.99
BniB036791	11	138			372	B8	43892846	43894817	43004	6.53
BniB038500	12	137			385	B8	22722044	22724416	44279.7	8.55
BniB044251	43	194			396	B8	19846284	19849133	44462.7	7.63
BniB049004	2	95			150	B8	13959886	13960505	17612.2	4.31
BniB002285	60	200			303	scaffold_10.1	1607022	1608594	33421.5	9.27
BniB002620	149	270			469	scaffold_10.1	1595365	1603149	52479.5	8.06
BniB002651	15	139			299	scaffold_10.1	1868688	1869819	33308.9	8.57
BniB005977	18	144			369	scaffold_12.1	1258089	1259966	40809.3	8.86
BniB007493	2	110	165	277	280	scaffold_131.1	388651	389493	32995.1	9.89
BniB019048	13	139			538	scaffold_234.1	85710	87891	60346.9	4.48
BniB022067	6	139			646	scaffold_28.1	1745026	1746966	72917.5	4.78
BniB022603	2	134			167	scaffold_289.1	148013	148516	19673.6	5.38
BniB024014	26	151			347	scaffold_30.1	532899	534359	39075.8	4.71
BniB031360	78	217			314	scaffold_42.1	1018987	1020559	35486.6	8.39
BniB031443	14	163			193	scaffold_42.1	246321	246902	22465.4	7.49
BniB032081	13	139			566	scaffold_431.1	108004	110192	63301.6	4.87
BniB032082	13	139			560	scaffold_431.1	86858	89054	62324	4.49
BniB032089	1	72			251	scaffold_431.1	155766	156646	29042.4	6.63
BniB032323	9	141			484	scaffold_44.1	25410	27800	55189.1	5.51
BniB033426	17	144			364	scaffold_464.1	37681	39452	42394.2	6.45
BniB038153	59	192			472	scaffold_57.1	412493	414750	52788.5	4.42
BniB038234	17	143			412	scaffold_57.1	824241	826662	47083.2	6.65
BniB039034	5	136			313	scaffold_6.4	729357	734080	35566.8	6.08
BniB039035	5	136			430	scaffold_6.4	709381	711628	48786.6	7.27
BniB039037	5	136			296	scaffold_6.4	680421	683088	33414.5	4.76
BniB039039	5	132			270	scaffold_6.4	651443	654418	30177.6	5.37
BniB039040	5	136			263	scaffold_6.4	643192	644843	30409.9	8.25
BniB040605	14	162			245	scaffold_63.1	14733	15470	28676	7.99
BniB044397	2	144			178	scaffold_75.1	644975	645511	21714.9	9.09

## Sheet: sequences
BniB002285	CDS	ATGACTTGGTGCAATGACAGTAGCGATGTTCAGACCGTTGAAACAATCATTCCCTCCCCAACAGTGGCTGAGTCTCCTGAAGCGTCATTTCAAGTGTCTTGTCACAAAACATGTCCTTCTTGTGGCCATAAATTCAAGTTTCATGAACAGGCGGGGATCCATGACTTGCCGGGACTTCCTGCCGGAGTGAAGTTCGATCCGACTGATCAAGAGGTATTGGGGCATCTTGAAGGAAAGGTAAGAGATGACGCAAGAAAGCTTCATCCTCTCATCGATGAGTTTATCCGTACCATTGACGGTGAAAATGGTATCTGTTACACCCATCCTGAGAAATTGCCAGGTGTGAGCAAGGACGGGACGGTCCGTCATTTCTTCCACCGACCATCAAAGGCCTACACT…
	PROTEIN	MTWCNDSSDVQTVETIIPSPTVAESPEASFQVSCHKTCPSCGHKFKFHEQAGIHDLPGLPAGVKFDPTDQEVLGHLEGKVRDDARKLHPLIDEFIRTIDGENGICYTHPEKLPGVSKDGTVRHFFHRPSKAYTTGTRKRRKVHTDSEVGGETRWHKTGKTRPVLTGGRVKGYKKILVLYTNYGKQKKPEKTNWVMHQYHLGTNEEEKEGELVVSKIFYQTQPRQCGGSLAAAATAKERPYLHGHHLGGGGGRHIYHNNGNIKGNGGGGSTGASEYYNNIPAIISFSQSGIQNHLVHGAQPFIP
BniB002620	CDS	ATGAGACCTCCTCTAACTGGTGGTAAGAACCCTAGCCGCCGCCTTGGTCTCCATCGACGTGGTGGTGGTGGGTTCAGTGGTGGACGAGGAGGTAGCTCCGGAGGTAGAGGTAGAGGAAGGGGTTTTGGAGAGCGTGGATGCGGCAGAGACATGACCAGTCGCAGAAGAGGAACACTTGCTCGCACAAGAGGAACACCCGGAGGACGTGGAGGGATGAAGGGAGGCAGCAAGGTGATTGTGGAGCCACACAGACACGCCGGAGTGTTCATTCCAAAGGGTAAAGAGGAAGCTCTTGTCACTAAGAACTTGGTCCCTGGTGAAGCTGTTTACAACGAGAAGAGAATCTCTGTTCAGAATGAAGATGGAACTAAGGTTGAATACAGGGTGTGGAACCCTTTC…
	PROTEIN	MRPPLTGGKNPSRRLGLHRRGGGGFSGGRGGSSGGRGRGRGFGERGCGRDMTSRRRGTLARTRGTPGGRGGMKGGSKVIVEPHRHAGVFIPKGKEEALVTKNLVPGEAVYNEKRISVQNEDGTKVEYRVWNPFSSKLAAAILGGVDNIYIIRAKSDHGDVEDDDVDEALKSATDLVEIDLHICEPWQLPDVAKLNAKEWYFFSFRDRKYATGYRTNRATVSGYWKATGKDRTVMDPRTSQLVGMRKTLVFYRNRAPNGIKTTWIMHEFRLECPNMPPKEDWVLCRVFNKGRDLPLQDSNYNNDHQMQSFEVNDAPDLNYAPNYNNQLQPLLSSPPSTTIDPPHHHDQWEQLMKQPSRIIDHPYHHHCQHQSIACGWEQMMIGSMSSLSSHGPDQESLLN…
BniB002651	CDS	ATGGGTGTTAGAGAGAAGGATCCGCTAGCCCAGTTGAGTTTGCCACCGGGTTTTAGGTTTTACCCGACAGATGAAGAGCTTCTTGTTCAGTATCTCTGTCGGAAAGTTGCAGGCTGTCACTTCTCTCTCCAAGTCATCGGAGACATCGATCTCTACAAGTTCGATCCTTGGGATTTGCCAAGTAAGGCCTTGTTTGGGGAGAAGGAATGGTATTTCTTCAGCCCGAGAGATCGGAAATACCCAAACGGGTCAAGACCCAATAGAGTAGCCGGGTCGGGTTACTGGAAGGCGACGGGTACCGACAAAATCATCACGTCGGATGGTCACCGCGTCGGGATTAAAAAAGCTCTGGTTTTCTACGCCGGAAAAGCTCCGAAAGGCACGAAAACGAACTGGATC…
	PROTEIN	MGVREKDPLAQLSLPPGFRFYPTDEELLVQYLCRKVAGCHFSLQVIGDIDLYKFDPWDLPSKALFGEKEWYFFSPRDRKYPNGSRPNRVAGSGYWKATGTDKIITSDGHRVGIKKALVFYAGKAPKGTKTNWIMHEYRLVEHSRSHGSSKLDDWVLCRIYKKTSGSQRQQAVPPVQPEHSTNGSSSSSSSHHEDVLDSFPEMNDRSFNLPRVNSLRTLLNGNFDWASLAGLNPIPELAPTSNGYGGYDAFRAAEGEAESGLRNSQMNSSELTQSFGYRSSGLSSCGGFGPSGQTFEFRQ
BniB033426	CDS	ATGGCGGAGAATAAGGTAAACCTGTCGATCAATGGACAATCAAAAGTGCCACCAGGTTTCAGATTCCATCCCACCGAAGAAGAACTTCTCCACTACTATCTTCGCAAGAAAGTTCACTCTCAAAAAATAGATCTTGATGTCATTCGTGAAGTAGATCTCAACAAGCTTGAGCCTTGGGATATTCAAGAAGAATGTAGAATCGGTTCGGCGCCACAGAACGACTGGTACTTCTTCAGCCACAAGGACAAGAAGTATCCAACCGGGACCAGGACAAACCGGGCAACACTTGCCGGATTCTGGAAGGCTACTGGACGTGACAAGATCATCTACAGTTGTGTCCGGAGGATTGGATTGAGGAAGACGCTCGTGTTCTACAAAGGAAGAGCTCCCCACGGTCAG…
	PROTEIN	MAENKVNLSINGQSKVPPGFRFHPTEEELLHYYLRKKVHSQKIDLDVIREVDLNKLEPWDIQEECRIGSAPQNDWYFFSHKDKKYPTGTRTNRATLAGFWKATGRDKIIYSCVRRIGLRKTLVFYKGRAPHGQKSDWIMHEYRLDETPTNNEYSDVVTEDLMTYNEEGWVVCRVFRKKNYQKIDDSPKITLYSSPDDTEEKRRSSTFHNTQNGTVLEHVLQYMDRPCPNLCMPEIPTTTKTQHNQDDLLYMQLPNLETPKSESLAGQSSTIPIQLDSALVQMKKTSRPVCSNWASLDRLVAWQLNNGHHKCDRTSFDEEEKDGDTMMQRWDLHWNNDDNVDLWSSFTESSSSPSSLDPLLHLSV
BniB005418	CDS	ATGGAAATAGGCTCATCATCCACGGTGGCTGGAGGAGGACAGCTTTCGGTCCCTCCAGGTTTCCGGTTTCATCCAACGGAGGAGGAGCTTCTATATTATTACCTCAAGAAGAAGGTTTCTTACGAGCCAATAGATTTAGATGTTATTAGAGAAGTTGATCTCAACAAGCTTGAACCTTGGGAACTTAAAGAGAAATGTAGAATTGGGTCGGGTCCTCAAAACGAGTGGTACTTCTTTAGCCACAAGGACAAGAAATATCCGACTGGGACCCGAACGAACAGGGCCACTGCAGCCGGGTTCTGGAAGGCTACTGGTAGAGACAAATCCATACATCTAAACAGCTCCAAGAAGATTGGACTTCGTAAGACTCTTGTCTTCTACACTGGTCGTGCTCCTCAT…
	PROTEIN	MEIGSSSTVAGGGQLSVPPGFRFHPTEEELLYYYLKKKVSYEPIDLDVIREVDLNKLEPWELKEKCRIGSGPQNEWYFFSHKDKKYPTGTRTNRATAAGFWKATGRDKSIHLNSSKKIGLRKTLVFYTGRAPHGHKTEWIMHEYRLDDNEYEIQEDGWVVCRVFKKKNHLRGFHQEQDQDHHHHQYISTNNDDDHHHHHQHHTESNSNNQSSLIPHTLDHHHVGRQIHMPLHEFANSLSHGSMHLPQLFSPDSAQPFVSSINTTDIECSQNLLRLTSNNNYGGDWSFLDKLLTSTNMNQHQQVQNHQAKCFGDSSNNGNNDQAVTSSSPDNQRFPFQYLGNDANLLKFPR
BniB010534	CDS	ATGGATAACATAATGCATATGCCACCAGGATTCCGATTTCATCCGACAGAGGAAGAACTCGTCGGTTATTACCTAGATAGGAAGATCAACTCAATGAAGAGTTCTTTAGATGTCATTGTAGAGATTGATCTCTACAAAATGGAGCCGTGGGATATTCAAGCGAGATGCACACTAGGGTATGAAGAGCAAAATGAGTGGTACTTCTTTAGCCACAAGGATAGGAAGTACCCGACCGGTACTAGGACCAATAGAGCCACAGCCGCCGGGTTCTGGAAGGCCACCGGCAGAGACAAGGCGGTGCTTTCAAAGAACAGTGTCATAGGAATGCGGAAGACACTTGTCTACTACAAAGGTCGAGCTCCTAATGGAAGAAAATCCGACTGGATCATGCACGAATAC…
	PROTEIN	MDNIMHMPPGFRFHPTEEELVGYYLDRKINSMKSSLDVIVEIDLYKMEPWDIQARCTLGYEEQNEWYFFSHKDRKYPTGTRTNRATAAGFWKATGRDKAVLSKNSVIGMRKTLVYYKGRAPNGRKSDWIMHEYRLQNSELAPVQEEGWVVCRAFRKPIPNQRPLGYEPWQNQLYHVDNSNNYSSSGTMNTSHHIGASSSSHNLNQMLMSNNHYNANNISSSMHQYGNIELPQLDSPSLSPSLGTNKDQNEGFEQEDAKSFNCVDWRTLDSLLETQVTHPQNPNALMSSFETQSYNPAQSFPSMHQNYNHEVETNIHDSLGCFPDS
BniB014418	CDS	ATGGAATCTTGTAGCGTTCCTCCAGGATTTAGGTTCCATCCGACGGACGAAGAGCTTGTCGGGTACTATCTAAGGAAGAAAGTCGCGTCGCAAAAGATCGATCTCGATGTCATTAGAGACATCGATCTCTACAAAATTGAACCATGGGATCTACAAGAGCGATGTCGAATCGGGTATGAGGAACAAAATGAATGGTACTTTTTTAGTCACAAAGACAAGAAATATCCAACAGGGACAAGGACTAATAGAGCGACCATGACTGGTTTTTGGAAAGCCACGGGAAGAGACAAAGCTGTTTATGACAAAACAAAACTGATTGGGATGAGGAAAACACTTGTGTTCTACAAAGGACGTGCTCCTAATGGGCAGAAATCCGATTGGATCATCCATGAGTACCGG…
	PROTEIN	MESCSVPPGFRFHPTDEELVGYYLRKKVASQKIDLDVIRDIDLYKIEPWDLQERCRIGYEEQNEWYFFSHKDKKYPTGTRTNRATMTGFWKATGRDKAVYDKTKLIGMRKTLVFYKGRAPNGQKSDWIIHEYRLESDENAPPQEEGWVVCRAFKKKATGQTNNTETWSSSYFYDEAVSSGVNSVIDPIEYISNQQHDIFRNGFMCKQELEGMVDDLNYMHSYHQFIQLPQLQSPSLSVMKRPTSSVSISSMDNNTHYITSLDDEASFESVVRKENKRKKNKNKQVTMAGDWRELDKFVASQLMSQDRGTSDLVGHHMNHEDMEMDSLLLNEREEENRFVSELLNSNKDYDSGIAYLMNETT
BniB015428	CDS	ATGAATTCATTTTCACACGTTCCTCCGGGTTTTAGATTTCACCCAACAGACGAAGAACTTGTAGACTACTACCTGAGGAAAAAAGTTGCATCTAAGAGAATAGAAATCGATTTCATAAAGGACATTGATCTTTACAAGATTGAGCCATGGGATCTTCAAGAGTTGTGCAAAATTGGACATGAAGAGCAAAGTGATTGGTACTTCTTTAGTCATAAAGACAAAAAGTATCCCACAGGGACTCGAACCAATAGAGCAACGAAAGCAGGGTTTTGGAAAGCCACCGGAAGAGATAAGGCTATATACTTGAGGCATAATCTTATTGGTATGAGGAAAACACTTGTATTTTACAAGGGAAGAGCTCCAAATGGACAAAAATCCGATTGGATCATGCATGAATAC…
	PROTEIN	MNSFSHVPPGFRFHPTDEELVDYYLRKKVASKRIEIDFIKDIDLYKIEPWDLQELCKIGHEEQSDWYFFSHKDKKYPTGTRTNRATKAGFWKATGRDKAIYLRHNLIGMRKTLVFYKGRAPNGQKSDWIMHEYRLETDENGTPHEEGWVVCRVFKKRLAAVRRMGDYDSSPSHWYDDQLSFMASELETNGPRRILPNHQHQYQHHLPYGFNTSAYALNNPNLLCKQELQYNHLQSNLAHEEQLNQGNQIFSSPYMNSGNEQAMDQVTDWRVLDKFVASQLSNEEAATASASLQNNAKDTSNLEYQVEEEKDEERVSDMGEEYDASTSSSCQIDLWK
BniB015762	CDS	ATGGGTTTGAAAGATATTGGGTCCACATTGCCACCGGGGTTCCGGTTTCACCCAAGCGATGAAGAGTTGGTTTGTCATTATCTCTGCAACAAGATTAGGGAAAAATCTCTCCACTGTAATGTTGAGGATGACGACGTTGATGAAGCCTTGAAGGATGCTACTGATCTTGTGGAGATTGACTTGCATATTTGCGAGCCATGGCAGCTCCCTGATGTGGCAAAGCTGAACGCCAAAGAATGGTACTTCTTCAGTTTCCGCGATCGAAAGTATTGCACTGGTTATCGTACAAACAGAGCGACACTTAGTGGATACTGGAAAGCAACAGGCAAAGATCGAACTGTAATTGATCCACGAACAAGGCAATTGGTAGGGATGAGGAAAACACTGGTGTTCTACAGA…
	PROTEIN	MGLKDIGSTLPPGFRFHPSDEELVCHYLCNKIREKSLHCNVEDDDVDEALKDATDLVEIDLHICEPWQLPDVAKLNAKEWYFFSFRDRKYCTGYRTNRATLSGYWKATGKDRTVIDPRTRQLVGMRKTLVFYRNRAPHGIKTTWIMHEFRLECPNMLPKEDWVLCRVFNKGRDLLSLQNNNDHLTQRFAVNDAPDLNYAPNYNNQSHPLLSSSPSTTFDPLHHLDQWGQLMKQPSRTTDHPYHHHCKHQTIACGWEQMMIGSMSSSSTHGQDHESLLNLLYADNNNDIKVTDDQYIQSYEKILLSSDSTSLDHDKICMGSSSDGGMVSDPRMECGGLSFETDNPLSFH
BniB031957	CDS	ATGAATCCCAACACTACGCTCCCTCCAGGCTTTAGATTTCATCCTACCGACGAAGAACTCATCGTTTACTATCTAAAAAACCAAACCATGTCCAGACCATGCCCTGTCTCGATCATTCCCGAAGTCGATATCTACAAGTTCGACCCATGGCAGTTACCCGAGAAAACAGAGTTTGGAGAAAATGAGTGGTATTTCTTCAGCCCGAGAGACCGAAAGTATCCAAACGGAGCCCGGCCGAACCGGGCAGCTGTTTCTGGTTATTGGAAAGCGACCGGTACAGACAAAGCTATTCACAGTGGTTCTAGTAACGTAGGCGTTAAGAAAGCTCTCGTCTTCTACAAAGGCCGACCTCCCAAGGGGATCAAAACTGACTGGATCATGCACGAGTACCGTCTCAAC…
	PROTEIN	MNPNTTLPPGFRFHPTDEELIVYYLKNQTMSRPCPVSIIPEVDIYKFDPWQLPEKTEFGENEWYFFSPRDRKYPNGARPNRAAVSGYWKATGTDKAIHSGSSNVGVKKALVFYKGRPPKGIKTDWIMHEYRLNDSRKASTKRNGSMRLDEWVLCRIYKKRGAGKLLDEKEGYVDEVQIDETLTIVTNESERRNEEEIMMMTSTKLPRTCSLAHLLEMDYMGPISHILTPFDLHSPDPNIVNESGWFGDLQISQDEIMNHQRQASMFQF
BniB033457	CDS	ATGGCTGGACAAACATGGCTGGTTGATAAACACCGTCTTGCAACTAAAGTTTTGAGTGGACCAGACCCGCGTGGAACCGTGTGGAACACCAATCCTACAAGACTTTGTCCCAACTGTCGTCACGTCATTGACAACAACGATGAAGTTGATGACTGGCCAGGCTTGCCACGAGGTGTGAAATTCGATCCAACTGATCCAGAGATCATATGGCATTTGCTTGCAAAATCTGGTTCAATGGGTTTAACTCCCCACCCTTTCACTGACGAGTTCATCCCAACCCTTGATCAAAACGATGGAATCTGTTACACTCATCCTAAGAACTTACCAGGTGTTAAGCACGATGGAACTGCGTCCCACTTCTTCCATAGAGCAATCAAAGCTTACAGCACAGGAACTCGG…
	PROTEIN	MAGQTWLVDKHRLATKVLSGPDPRGTVWNTNPTRLCPNCRHVIDNNDEVDDWPGLPRGVKFDPTDPEIIWHLLAKSGSMGLTPHPFTDEFIPTLDQNDGICYTHPKNLPGVKHDGTASHFFHRAIKAYSTGTRKRRKIHDDDLADVRWHKTGRTKTVSLDGVQRGCKKIMVLYEGKTVKTNWVMHQYHLGTDEDEKEGEYVVSKIFYQQPQQQAVLKKGGDKAEQYVSEDIFAATTTPKADPATPKLFTPEPRQAVPFCSDPHLADEYANVSDYVTAHEVSVAVTSEAMYMEDEVQGAQRNHERPSYEDDPAPETGIENGDNEIMRFDKEDENDQENKEGENEEAEEDQNWLDSGGSQFILNSQQLVEALSLCDDLLQVGSQDTNNGGGLRNKQPCFGD…
BniB035526	CDS	ATGGAAATAAACTCCAATTCTACTACACTCCCTCCAGGATTCAGATTTCATCCTACCGATGAAGAGCTCATCGTTCACTATCTCCGAAACCAGACCATGTCTAAGCCATGCCCTGTCTCCATCATCCCAGAAGTAGATATCTACAAGTTCGACCCATGGCAGTTACCCGAGAAAACAGAGTTTGGAGAAAATGAATGGTATTTCTTCAGCCCGAGAGACCGAAAGTATCCGAATGGAGTCAGGCCAAACCGGGCTGCTGTTTCCGGTTACTGGAAAGCAACCGGTACAGACAAAGCAATTCACAGCGGTTCGAGTAACGTGGGTGTGAAGAAAGCTCTCGTTTTCTACAAAGGCCGACCTCCAAAAGGAATAAAAACCGACTGGATCATGCACGAGTAC…
	PROTEIN	MEINSNSTTLPPGFRFHPTDEELIVHYLRNQTMSKPCPVSIIPEVDIYKFDPWQLPEKTEFGENEWYFFSPRDRKYPNGVRPNRAAVSGYWKATGTDKAIHSGSSNVGVKKALVFYKGRPPKGIKTDWIMHEYRLNDSRKASTKRNGSMRLDEWVLCRIYKKRGAGKLLDEKEGFMDESQINETLAAVTNEAERINEEEIMMMTSTKLPRMCSLAHLLEMDYMGPISHILTPFDLHHPDLNGMNESGWFGDLQVNQDEISNHHRQPSMFQF
BniB037187	CDS	ATGGGAGAGAACAACGGAGAAGCTAAGAAAATGGAAGATGTGTTGTTGCCTGGATTTAGGTTTCATCCAACGGACGAAGAGCTCGTGGGTTTCTATCTAAGACGGAAGGTTGAGCATCGCCCACTTTCCATTAAGCTCATCACACAGCTAGACATCTACAAATATGACCCGTGGGATCTTCCAAAGTTTGCGATGACGGGTGAGAAAGAATGGTACTTCTACTGTCCAAGAGATAGAAAGTATAGGAACAGCACGAGGCCTAACCGAGTGACCAGTGCTGGATTCTGGAAAGCCACGGGAACGGACAGGCCGATATACTCATCGGACGGAAGAAAATGCATTGGTCTGAGGAAGTCACTTGTGTTTTACAAAGGAAGAGCTGCTAAAGGAGTTAAGACA…
	PROTEIN	MGENNGEAKKMEDVLLPGFRFHPTDEELVGFYLRRKVEHRPLSIKLITQLDIYKYDPWDLPKFAMTGEKEWYFYCPRDRKYRNSTRPNRVTSAGFWKATGTDRPIYSSDGRKCIGLRKSLVFYKGRAAKGVKTDWMMHEFRLPSSSTHTLSDTHLSPNDSWAICRIFRKTNTTALKPISRSFVPSLPTEASTDTEPYEKTSNTAHIYPENILENSVSLNLYKKNMNVTKRRSYYEEKEATKTSACTSTSPFSYMDVTSSASPVPSVDQQYLRSLLLASQETQPTQLSKFINNNDISSFLLNMSPSDSSFLGGYTNQIGSNIDLTTAILAQEQCPALVNLSQEYQDIGFEENIGGANQDHDHHKVKFGDVSSTMVGDQHQNQRHHMLMESYYSSFSTTND…
BniB039752	CDS	ATGGAGACTTCAAGGAATTCGTGTCCGGCTGGAAACAAAGTCTTAGCTCCAGGTTTTAGGTTTCATCCTACCGACGAGGAACTGGTTGTGTATTATCTCAAGAGAAAAATTCGCCGCAAGAAACTGAGAGTCGCTGCTATCGGCGAGACGGATGTCTACAAGTTTGATCCCGAGGAGTTGCCCGGCAAAGCATTATATAATACTGGAGATCGTCAGTGGTTCTTTTTCAGCTCGAGGGACAGGAAACAACATGGAGGCAGGTCAAGCAGATCAACTGGCCATGGATACTGGAAAGCAACAGGGGTAGACAGGGTCATCAAGTGCAATTCTCGTCCCGTTGGAGAGAAGAAGACGCTTGTTTTCCACAGAGGCAGGGCTCCTAAGGGGGAGAGGACTAAC…
	PROTEIN	METSRNSCPAGNKVLAPGFRFHPTDEELVVYYLKRKIRRKKLRVAAIGETDVYKFDPEELPGKALYNTGDRQWFFFSSRDRKQHGGRSSRSTGHGYWKATGVDRVIKCNSRPVGEKKTLVFHRGRAPKGERTNWVMHEYTLHKEELKMCGDVKHNYALYKIFKKSGSGPKNGEQYGAPFVEEEWAEDDDEPDEAEAVVVPQNQVMVSAGMGNNNTIWADGGGLNQSELNENDIQDLMRQVSEETGVNSHVANNNPVNLAEDEYLEIDDLLLPGPEPSYVDQGESAVLNDNDFFDVDSYIGDFDAANPQSEPVGVGLNNGVVHSLPVTDQDQFQQQTWKNQDSNWPLRNSYTRKISSGAWTHELNNDEVTVCRYGEAPGTGNDASEFINPLTSAISTAKG…
BniB042763	CDS	ATGCAAAGCTATCACAATCGAAGCAGCAGGAGGCTCAGCAGCAGCATTGTTCAACGGTCCAGATTCATCGTCCCTTGTTTCTCATCATCACCACTCTCCCTCTTCGTCGTCCTCGCCGCTGTTCCTTTTCCGATCTACTTTTCCGGTCTCCTCTCTTCTTTCTCCGGCAGAAACAACAAGGCGGCTTCAACTATGAGAGTGAACTCGAACATAGGTTCGACGAATATAACGTGTACCACTTTCAACGTCTTGGCTCCCATTTACAAACGCGTTGATCAACAGAATCAGAGCATTCGCGAGAGTCATTTTCGCGCGCTTTGGTTTGCTCGGAACCAAAAGATTTTAGATTTATTACTCCATCAACGCTCTTCAGTCATTTCTCTCCAGGAAGTTTGGGTT…
	PROTEIN	MQSYHNRSSRRLSSSIVQRSRFIVPCFSSSPLSLFVVLAAVPFPIYFSGLLSSFSGRNNKAASTMRVNSNIGSTNITCTTFNVLAPIYKRVDQQNQSIRESHFRALWFARNQKILDLLLHQRSSVISLQEVWVGNEELVNMYHDRLASAGYTTFQLARTNARGDGLLTAIHKDYFQLVNYRELLFNDFGDRVAQLLHVKSIVPFPLNENQDVQQEVLIVNTHLLFPHDSSLSLARLHQVYKILEYLEAYQKENKLTHMPIILCGDWNGSKRGHVYKFLRSQGFISSYDVAHQYTDSDAHRWVSHRNHRGNICGVDFIWLCNPTSNSRKPLRTSWVEAVFSIIKYQVQKASIAEDKAFAFLGENNHSDSLTYSGFCQALQKVNLTGMPHGLSFQETKELW…
BniB042764	CDS	ATGGAATATCCGGTGGGGTTCAGATTCAGTCCTACCGATCATGAGATCTTGGGCTATTACCTCAGGCTCAAAAATGTCGGTGGTGACACGAGCCTTGTGGATGAAGTCATTAGCACAGTAGATATCTATAGCTTTGAACCCTTGGAACTACCTCACCACTCGAGGATGGAATCGACAGACCAGGTTTGGTACTTTTTCGGTCGTAAAGAGAACAAATATAACAAAGGCGAGAAACAGAGAAGACAAACCACGTTTGGTTATTGGAAGAAAACCGGGCTTACAACGGAGATCATGCAAAAGAGAGGAGACCGCGAGAAGATTGGTGAGAAAAGGGTTTTGGTGTTTTACGTGAGGGAATCCAAATCCAAATCCGATTGGGTTATGCACGAATATGTAGCT…
	PROTEIN	MEYPVGFRFSPTDHEILGYYLRLKNVGGDTSLVDEVISTVDIYSFEPLELPHHSRMESTDQVWYFFGRKENKYNKGEKQRRQTTFGYWKKTGLTTEIMQKRGDREKIGEKRVLVFYVRESKSKSDWVMHEYVATSLPPTHQMVTYTVCKVMFKGDPTDLHSSSAAAVSVGSGEIEQNHSLIPHMNNSGGGLSSAAEGSPFALQTQRQFTGFLPLEEETQFEDEMLRVFNNLPTDDWNSLFNNEEQETIMLTQEDRNDYKPKKSLTGIFIGYSDDDSDSDLNSATTTDSIQTWSTGDSFGSSYPRIDQISDLQESSCSTTESASGTQEVSKALGTNDIDTSEKKINPYDDAQGNGFNKTGIPTALWDLTEPYAKIDQANGTAVLAFVILILYNVPTVLLL…
BniB042765	CDS	ATGGTGGATCCGCATACCGTGGGTTTCAGATTCCGCCCGACCGATGATGAGATCGTCGACCACTACCTCAAGTCAAAAAATATGGATGGTAACACCACTCGTGTAGATGAAGTCATTAGCACAGTGGATATATATAGCTTCGATCCTTTGGAGTTAGCTTCCCAGTCGAGTTCGGCGAGGAAGGCTACGGACAATGTTTTGTATTTCTTCTGTCGGAAGGAGAACAAATATAACAGAGGAGAGAGACAGAGCAGGAAAACCAAGTCTGGTTCTTGGAAGAAAACCGGAGTTACAACGAATATCATGCGAAAGAGAGGAGATCGCCAGAAGATTGGTGAGAAAAGGGTCTTTGTGTTTCAGTACAGTAAGATTCTTGGTGGAGCGAAACCTAAATCCGAT…
	PROTEIN	MVDPHTVGFRFRPTDDEIVDHYLKSKNMDGNTTRVDEVISTVDIYSFDPLELASQSSSARKATDNVLYFFCRKENKYNRGERQSRKTKSGSWKKTGVTTNIMRKRGDRQKIGEKRVFVFQYSKILGGAKPKSDWVMHEYVATFVSLTRTPAVTYTLCKVMFKGDTSDSPSSAAAPAGGGGSGGGGGDGSDGGGRDGCGGDGGGGGGCDGGVSDGGGSDGGGGGGCDGGGSGGGGGSSGGGGCDGGGGGGCDGGGGGGCDGSGSGGDGDGCGEVEHTHSLITPINNPGGGLSAEAERSSSELHNPRQFTGFLHLEEETQIEDAIRRAINNLSPHDLNCLLNYDYDDEEQGNSQEVSFYYLSFSETYHS
BniB042766	CDS	ATGGTGGATCCGGTGGTGGGTTTCAGATTCCGTCCGACGGACGAGGAGATAGTGGGACATTACGTGAGGCCAAAGAACCTCGGAAGTAACACGAGTCATATAGACAAAGTCATGAACACAGTCGATATATATAGCTTCGACCCTTGGGAGTTACCTGGCAAGTCGAGGATCAACTCGACAGATGAGGCCTGGTACTTCTTCGGATGTAAGAAGAACCAACAACATACGCTTAACAAACAGAGCAGGAAAACCATTTCTGGTTTTTGGAAGAAAACCGGTGATAAAACGGATATCATGCGAAAGAGAGGAGGAAATGGCGAGAAGATTGGTGAGAAAAGGGTTTTCGTGTTTAGTAGCAAGATTCCCAGCGGTTCGAAATCGAAATCGAGACCGAGACCG…
	PROTEIN	MVDPVVGFRFRPTDEEIVGHYVRPKNLGSNTSHIDKVMNTVDIYSFDPWELPGKSRINSTDEAWYFFGCKKNQQHTLNKQSRKTISGFWKKTGDKTDIMRKRGGNGEKIGEKRVFVFSSKIPSGSKSKSRPRPKPKSKSDWVMHEYIATFTSPDSPNQTMMMTYTVCKVMFKGDPRDLPSSSSSSSAAREIEHDLSLIPHHVNNNPGGLSTETENPNQVTSTISLIPHDVNNSSGGLSTEIEVESSFELQNPRQFSGFLHLEEDAHIEDETIRALNSLPPNDDDAEEEEHVNLLFTQDDRNDYRPKLSLTGFISDEDSDSDPITTTCSTKSSSTCVSFRSSNPPIDLPESPCSTIESWSVTREVSKALGPNTVISEKKMSPCGDEAQGSDTRGDQMGQD…
BniB042767	CDS	ATGGTGAATCCGGTGGGACTCAGATTTCTTCCGACGGACGAAGAGATCGTCGACTACTACCTCAGGTTAAAAAATATCGGTGGTTCCACCACGAGCCATGCCGATCAAGTCATTAACACAGTCAATATCTGTAACTTCGATCCTTGGGAGTTACCTCGACAGTCGAGGATGGAGTCAAAAGATGAGGTATGGTATTTCTTCGGACGCAAGGAGAAGAGATATAACAGAGGTGAACGACAGATCAGAAAAACCAAGTCTGGTTTCTGGAAGAAAACTGGAGTGACAATGAATATCAAGCGAAAGAGATCAGGGCATCGCGAAAAGATCGGTGAGAAAAGAGTTTTAGTGTTTCACTCGAATGGATCGAAAACCAACTGGATCATGCACGAGTACGACGCT…
	PROTEIN	MVNPVGLRFLPTDEEIVDYYLRLKNIGGSTTSHADQVINTVNICNFDPWELPRQSRMESKDEVWYFFGRKEKRYNRGERQIRKTKSGFWKKTGVTMNIKRKRSGHREKIGEKRVLVFHSNGSKTNWIMHEYDATCLSPNQNMTYTICKVHKKGEAKEISSPDSEIEEHIHPLITHMNNSGGEQSEGSERPLQLSGILDKQQETELEEAIQGAFDILSSCDWKYLLDDDDELSKIHSMQTH
BniB042768	CDS	ATGGAAAATTGGGTGGGGTTTAGATTCAGTCCCACCGACGAGGAGATCGTCGACCATTACGTCAGGCTCAAAAATCTCGGTGGTGACACGAGCCATGTCGATAAAGCCATTAGCACAGTAGAAATCTGTAGCTTCGAACCCTGGGAGTTACCTCGCCACTCGAGGATGGAATCAAAAGATCAGGTTTGGTATTACTTCGGTCGGAAGGAGAACAAATATAACAGAGGAGAGAGACAGAGCAGAAAAACCAATTCTGGTTCTTGGAAGAAAACCGGGGAGACAGCGAAGATCTTCCGGAAGAGAGGGAACGGCGAGCAGATTGGTGAGAAAAGGGTTTTGATGTTTTACTTGAGCGGTTCAAAATCCAAAACTGATTGGGTTATGCATGAATACATCGCT…
	PROTEIN	MENWVGFRFSPTDEEIVDHYVRLKNLGGDTSHVDKAISTVEICSFEPWELPRHSRMESKDQVWYYFGRKENKYNRGERQSRKTNSGSWKKTGETAKIFRKRGNGEQIGEKRVLMFYLSGSKSKTDWVMHEYIATFLPPTLMTYTVCKVIFKGDASDLQNPRHFTGLLDAEKEAQIGDAIRRAIFDNVSTDDLNCFINCNSNNDEEEQGNTMFIEDRNDYKPKMSLTGFISGDDDGSDSDLVSATTTGSIQTSSTSDSFGSSNRCIDQITDLQNSPNSVTKLVSLTQAVSTTSLDASKEKFVVRGTETGDYEMDRQKKKGNRPRSGMNLAGREFIVNKFEEKFGKRCIWDRFKNKVDISRKAYVKFKKLTHNKTGLFYDALGRLKMPDAWWDQRIAEWQG…
BniB042769	CDS	ATGGAGGAAAAGCCAGGGTTTGGATTCCGCCCGTACGACTATGAGCTCGTGGTTTACTATCTCCTTCACAAAATTCAGGGAAACCATAGTCTCGTCGACGGAGTCATCAGAGAGATCAACAACATCTGCAGCTTAGATCCTTGGGACTTGCTCTTTCAATCGAAGATCAAATCGAGAGATCTTTTTTGGTACTTCCTGTCGCGTAGAGAAGACAACGGGAGTAAACAGAACAGGAAGACGCCTTCTGGGCACTGGAAGCTTACCGGACTACCTGTAGATGTCAAGGATCAGTGGGGACACTTGACTGGTTCTCGAGGTGAGAAGATTGGTCAGAAAAGGGTTTTGACGTTCCACAGTGGGAATCCGGAAAGCAGCAGCATCTCTTCTGAGAAAAAAAAA…
	PROTEIN	MEEKPGFGFRPYDYELVVYYLLHKIQGNHSLVDGVIREINNICSLDPWDLLFQSKIKSRDLFWYFLSRREDNGSKQNRKTPSGHWKLTGLPVDVKDQWGHLTGSRGEKIGQKRVLTFHSGNPESSSISSEKKKSAWVMHELHYTHTDLPEHKRTSYVICRLEYKGEDVNILSADHTFAPTMANSASSMVDQRNSGGYYNTFPDCQDQQFSGISDTLQSFQEYFDHNFKPILDLEYALQKQSDWYSDHLNLEPPPPQVPYSAQLQYLEETLMRDDFSQYRPKKPVTGYFSGYSSDSDTDSMIGRDAWSSTDSVGSKDGPYHTPKDDTPSLSTVEPLNNYEAQEQTKQLELQVQGLEKVINKQKSECERKMAEDSIKKAPSTTAVKQSWIVLEEMSQRNSR…
BniB042770	CDS	ATGGTGGATCCGCATCCGGTGGGTTTCAGGTTCCGTCCGACCGACGATGAGATCTTCGACCATTACCTAAGGTCGAAAAATCTTGATGGTAACACGAGTCATGTAGATGAAGTCATTAGCACAGTGGATATCTATAGCTTCGATCCCTGGGAGCTAGCTTCCCATTCGAGTTCGATAAGGAAGGAAACGGACTATGTTTGGTATTTCTACGGTCGTAGAGACAACAGAGGAGAGAGACAGAGCAGGAAAACCAAGTCTGGTTTTTGGAAGAAAACAGGAGTTACAACGGATATCATCCGAAAGAGAGGGAATCGCGAGAAGATCGGTGAGAAAAGGGTTTTGGTGTTTCAGTACAGTAAGATTCTTGGTGGGTCGAAGCCCAAATCAGAATGGGTTATG…
	PROTEIN	MVDPHPVGFRFRPTDDEIFDHYLRSKNLDGNTSHVDEVISTVDIYSFDPWELASHSSSIRKETDYVWYFYGRRDNRGERQSRKTKSGFWKKTGVTTDIIRKRGNREKIGEKRVLVFQYSKILGGSKPKSEWVMHEYVATFLSPTQAPMVTYTVCKVMFKGDASNLPSSSAAGGGCEVEHTHSLITPINNPGGGLSSEGFSSELQNQRLFSGFLHLEEETQIEDAFRRVINNLSTQ
BniB042771	CDS	ATGGACAATCGGGTGGGGTTCAGATTCATTCCTACTGACGAGGAGATCGTGGACTATTACCTCAGGCTAAAAAATCTAGGTGGTTCCACTAGTAGCCATGTAGATGAAGCCATTAGCACAGTGGATATCTGTAGCTTCGAGCCCCGGGAGTTACCTGCCAAGTCGAGGAGGGAATCGAGAGATCAGGTTTGGTATTACTTCGGTCGGAAGGAGAACAAATATAACAGAGGCGAGAGACAGAGCAGGAAAACCAAATCTGGTTTCTGGAAGAAAACCGGGGAGACAGCGAAGATCTTCCGAAAGAGAGGGAACGGCGAGCAGATTGGTGAGAAAAGGGTTTTGGTGTTTCAATCGAGCGGCTCAAAAACAAAATCCGATTGGGTTATGCACGAATACGTC…
	PROTEIN	MDNRVGFRFIPTDEEIVDYYLRLKNLGGSTSSHVDEAISTVDICSFEPRELPAKSRRESRDQVWYYFGRKENKYNRGERQSRKTKSGFWKKTGETAKIFRKRGNGEQIGEKRVLVFQSSGSKTKSDWVMHEYVATLLPPADQTTYTVCKVMFRGDPTDLPSSSASAGEVEQIITHMNHYGGSEVSLFLFLGQVIENLTTTLFVCFRGYRIHVTLLACLMRRRKLRSMMHYAGLSTDDLNCLLNSNENDEKQRNIMFMQENRNDYRPKMSLTGVFIGHSDDDSDSDFISTTTTGSIQTSSACSSFGSSYRRIDQITDLLKSPNSTTKLMSPAQVVSKTLETSLDTSDEKNNHYEDVQGTEMGEYEIDQEVINNKRAGFFYRKIQSCIKKTLLCFSIP
BniB042772	CDS	ATGGAGGAAAAGCCAGGGTTCGAATTCCGCCCGTACGACGATGAGCTCGTGGGTTACTATCTCCATCACAAAATTCTGGAAAACGATAGTCTCGTCGACGGAGTCATCAGAGAGATCAACAACATCTGCAGCTTAGATCCTTGGAACTTGCGCTGTGAAGAAAACAACGGGAGTAAACAGAGCAGGAGGACGCGTTCTGGGTTCTGGAAGCTTACGGGAGTACCTGTCGAAGTCAAGGATCAGTGGGGTTCTCGAGGTAAGAAGATTGGTCACAAAAGGGTTCTGACGTTTCACAGTGGGAATCCGGAAAGCATCAGCAGCTCTTCTGATAAAAACAAACCCGAGTGGGTGATGCACGAGCTTCACTACGCCCTCTTGCCTGAGCAGAAGAGGACCTAT…
	PROTEIN	MEEKPGFEFRPYDDELVGYYLHHKILENDSLVDGVIREINNICSLDPWNLRCEENNGSKQSRRTRSGFWKLTGVPVEVKDQWGSRGKKIGHKRVLTFHSGNPESISSSSDKNKPEWVMHELHYALLPEQKRTYVICRLEYKGDDMNILSANPTDPFPTFAPTMAKSASSVVDQSYQGNSGHHNTFSEYDSAYQGHQFNGNYDTQPSFQGYSEYINPTLEYDLANRSQWFSNLQKQQQQAPYSAPYQDGSDVWKQVVEENWSSLVDERTCMREHSSHYRPKNPVTGIFIDSDDDTDSTIGRDTWSSTDSVGSKDVPYPTPKDDTSPFSTVEPLPNHEAQEKPKQLELQLQLHGKEKVINKQKNDCECKLGEDSIKKAPSTTAVKQSWFVLEEMSHRNSQW…
BniB042773	CDS	ATGGAGGGTATTGTGGGGTTTGGATTCCGTCCTACAGATGAGGAGCTGGTCGGGTTTTATCTCCATAACAAAATCCTTGGACACAACTGGCTCGTACAAGAATTCATCAGCGAGGTTAACATCTCTGACTTCGATCCTTGGAACTTGCGCTTCCAATCGAAGGTGAAATCGAGAGACCTTGTGTGGTACTTCTTTTCTCGTAGGGATGGGAATGGGGACAGACAAAAGAGGAGAACGAGTTCTGGGTTCTGGAAGATTACTGGAGATCCTGTTGATGTTAAGGATCAGTGGGGAACTTGGTGTGGAGTTGCAGGTAAGATTGGTTACAAAAGGGTTTTGGTGTTCCGCATGGGAAGAAGCTCGAGCTCACAGAGCCCCAAATCTGATTGGGTCATACAC…
	PROTEIN	MEGIVGFGFRPTDEELVGFYLHNKILGHNWLVQEFISEVNISDFDPWNLRFQSKVKSRDLVWYFFSRRDGNGDRQKRRTSSGFWKITGDPVDVKDQWGTWCGVAGKIGYKRVLVFRMGRSSSSQSPKSDWVIHEYHYTLVPENQRTYVICRLEYKGHDNILSSNPTDPVPTFVPNATNSTASGSAVSQSVQENLGSFNTFFDYDSTNQGQWFSGDFNLEQPVVPSDGGICRIWDYVVEENFSRYRL
BniB042775	CDS	ATGGAAAATCGGGTGGGGTTCAGATTCGTTCCTACTGACGAGGAGATCATCGAGCATTACATCAGGCTCAAAAACATCGGTGGTTCCACCAATAGCCATGTAGACGAAGCCATTAGTACAGTCGATATATGTAGCTTCGATCCTTGGGAGTTACCTTGCAAGTCAGGGAGGGAATCGAGAGATCAGGTTTGGTATTACTTCGGCCGGAAGGAGAACAAATATAACAGAGGCGAGAGACAGAGCAGGAAAACCAATTCTGGTTTCTGGAAGAAAACCGGGGAGACAGCGAAGATCTTCCGAAAGAGAGGGAACGGCGAGCAGATTGGTGAGAAAAGGGTTTTGATGTTTTACTTGAGCGGTTCAAAATCCAAAACTGATTGGGTTATGCATGAATACATC…
	PROTEIN	MENRVGFRFVPTDEEIIEHYIRLKNIGGSTNSHVDEAISTVDICSFDPWELPCKSGRESRDQVWYYFGRKENKYNRGERQSRKTNSGFWKKTGETAKIFRKRGNGEQIGEKRVLMFYLSGSKSKTDWVMHEYIATFLPPTTTVQMTTYTVCKVMFKGDPTDLPSSSGGGGGGEVEHNHFLITHVNNSGGSEGLQNPRHFTGLLDVEEETRIDDALRRAFDNVSTHDLNSLLNYENDDVNLLFMQEDRNDYKPKMSLTGVFICHSDEDDDSDSDLISATTTGSIQTSSTFDSFGSSDSRIDQITALPNSPNSTTKLMSPTQVGEQNSRNHS
BniB042776	CDS	ATGGAGGAGGAAAAGCCAGGTTTTGGATTCCGTCCGTACGAAGAGGAGCTCGTTGGTTTCTATCTCCGTCACAAAATTCTCGGAAACGACGGTCTCGTCGACGAAGTCATCAGAGCGATCGACATCTGCAGCTTCGATCCTTGGGACTTGCGCTTTCAATCGAAGATCAAATCGAGAGATCTTTTTTGGTACTTCCTGTCGCGTAGAGAAGACAACGGGGGGAGTCGACAGAGCAGGAGGACGCCTTCTGGGTTCTGGAAACTCACCGGAGATCCTGTGGATGTCAACGATCGGTGGGGAAACATGTCTGGATTTCAAGGTACGATTGGTTACAAGAGGGTTTTAACGTTCGGTAAGGGGAAAAGCAGCAGCTCCAAATCTGATTGGGTGATGCACGAG…
	PROTEIN	MEEEKPGFGFRPYEEELVGFYLRHKILGNDGLVDEVIRAIDICSFDPWDLRFQSKIKSRDLFWYFLSRREDNGGSRQSRRTPSGFWKLTGDPVDVNDRWGNMSGFQGTIGYKRVLTFGKGKSSSSKSDWVMHEFHYTHTDLPEHKRRTYVICRLEYKGDDVNILSATNPTDPIPTFAPTMANSASSVVVEENWSSLVDERTMREDPSHYRPKNPVTGIFPDSDDDTDSTIGRDTWSSTDSVGSKDGTYHTPKVYDTPSLSTVEPLHNHEAQEQPKQLELQLQGKEKVINEQKSECQWKMVEDSIKKAPSTTAVKQSWIVLEEMSQRNSRWIHLKNMIIGFLLFISIIGWIILVG
BniB042777	CDS	ATGGAGGATATTGTGGGGTTTGGATTCCGTCCTACCGATGAGGAGCTGGTCGGTTACTATCTCCGTAACAAGATCCTTGGACATGACTGGCTCGTACAAGACTACATCAACGAGGTCAACATCTCTGACTTCGATCCCTGGAACTTGCGCTTTCAATCGAAGGTGAAATCGAGAGACCTTGTGTGGTACTTCTTTTCTCGTAGGGGTTCGAATGGGGACAGACAGAACAGGAGAACGAGTTCTGGGTTCTGGAAGATTACTGGGGATCCTGTAGAAGTTAAAGATCAGTGGGGAACATGGTGTGGAGTGAAAGGTAAGATTGGTTACAAAAGGGTTTTGGTGTTCCGCAGGGGAAGAAGCTCGAGCTCTCAGAGCACCAAATCTGATTGGGTTATGCAC…
	PROTEIN	MEDIVGFGFRPTDEELVGYYLRNKILGHDWLVQDYINEVNISDFDPWNLRFQSKVKSRDLVWYFFSRRGSNGDRQNRRTSSGFWKITGDPVEVKDQWGTWCGVKGKIGYKRVLVFRRGRSSSSQSTKSDWVMHEYHYSVLPEDQLKKISAGPKKPVRGIFVDVDSSDADTDTESTGNYAKQ
BniB042802	CDS	ATGTCAGAATTACAGTTGCCTCCAGGATTCCGATTTCACCCGACCGACGAAGAGCTAGTGATGCACTATCTCTGCCGAAAATGCGCCTCTCAGTCCATCGCCGTCCCCATCATCGCTGAGATCGATCTCTACAAATATGATCCTTGGGAGCTTCCCGGTTTAGCCTTGTATGGTGAGAAGGAATGGTATTTCTTCTCTCCGAGAGACAGAAAATATCCAAACGGTTCACGGCCAAACCGGTCAGCTGGGTCAGGTTACTGGAAAGCCACTGGAGCTGATAAACCGATCGGACTTCCTAAACCGGTTGGGATTAAGAAAGCTCTGGTTTTCTACGCCGGAAAAGCACCCAAGGGTGAGAAAACCAATTGGATCATGCATGAGTACCGTCTCGCCGACGTT…
	PROTEIN	MSELQLPPGFRFHPTDEELVMHYLCRKCASQSIAVPIIAEIDLYKYDPWELPGLALYGEKEWYFFSPRDRKYPNGSRPNRSAGSGYWKATGADKPIGLPKPVGIKKALVFYAGKAPKGEKTNWIMHEYRLADVDRSAARKKKNSLRLDDWVLCRIYNKKGAIEKRGPPQPTPTPVGYGGISDEVVEEKPRVTEMGMPPPPVMPNDFVYFDTSDSVPKLHTTESSCSEQVVSPEFTSEVQSEPKWKDWSGDKSSLDYGFNYIDATVDNAFGGGGSNQLFPLQDMFMYNMPKPF
BniB042845	CDS	ATGGCGACGGAGACTGCGCAAGCGACGTTGTCGATGGAGTCTTTACCTCTTGGTTTCAGATTCAGACCAACTGATGAAGAACTCATCAACCACTACCTAAGATTGAAAATCAACGGCCGTGATTTGGAGGTCAGGGTCATCCCTGAGATCGATGTTTGCAAGTGGGAGCCATGGGACTTACCTGGGCTTTCGGTGATAAAGACGGATGATCAAGAGTGGTTCTTCTTCTGTCCTCGTGACCGGAAGTATCCGAGTGGCCACCGCTCAAACAGAGCTACTGACATTGGATACTGGAAAGCTACTGGTAAAGACCGAACTATCAAGTCCAAGAAGATGATTATCGGTATGAAGAAGACCCTTGTCTTCTATCGTGGTCGAGCTCCTAGAGGTGAACGAACC…
	PROTEIN	MATETAQATLSMESLPLGFRFRPTDEELINHYLRLKINGRDLEVRVIPEIDVCKWEPWDLPGLSVIKTDDQEWFFFCPRDRKYPSGHRSNRATDIGYWKATGKDRTIKSKKMIIGMKKTLVFYRGRAPRGERTNWIMHEYRATDKDLDGTAPGQNPYVLLRLFHKPSDVANFDEVENVNATPTTTRCSREDNSSEMVQETAASRVHPQNVSDDTERCPSDKGSDVKPDATVIKTENHAETSRARDGVSGKSIVEENPFARDFSSLYGPNIYSGDQTYAPVQSSIGFAAASNMDSMYSSDFGNCDYGLHFQDGAAIQDESLTDVLDEVFHNHNHNHNQSSSQGKDFALPNMMHWSFPKDTFGFVNGGAEAACSQFVPDTGASRLVGDHYVDSKEAVERQS…
BniB042852	CDS	ATGGCGGAGAATAAGGTAAATCTTTCGATTAATGGACAATCAAAAGTGCCTCCAGGTTTCAGATTCCATCCAACAGAGGAAGAACTTCTCCATTACTATCTCCGCAAGAAAGTCCACTCTCAAAAGATCGATCTTGATGTAATTCGTGAAGTAGATCTGAACAAGCTTGAGCCTTGGGATATTCAAGAGGAATGTAGAATCGGTATGACGCCACAGAACGATTGGTACTTCTTCAGTCATAAGGACAAGAAGTATCCAACCGGGACAAGAACAAACCGGGCAACGGTCGCTGGATTCTGGAAAGCTACAGGACGTGATAAGATCATCTACAGTTGTATCCGGAGAATTGGATTGAGAAAGACGCTCGTGTTCTATAAAGGAAGAGCTCCTCATGGTGAG…
	PROTEIN	MAENKVNLSINGQSKVPPGFRFHPTEEELLHYYLRKKVHSQKIDLDVIREVDLNKLEPWDIQEECRIGMTPQNDWYFFSHKDKKYPTGTRTNRATVAGFWKATGRDKIIYSCIRRIGLRKTLVFYKGRAPHGEKSDWIMHEYRLDDTPTSNGCSDVVTEDPMSYNEDGWVVCRVFRKKNYQKIDDSPKITLSSSPDDTDQHRRPTTFHNTQNANHVLRYMDRSGPNIFMPEIETKTQHQDDLLFMQLPSLETPKSENLVGQSLTTTSQLDSSLVHQKIIGRPVCSNWASLDRLVAWQLNNGHHTCDRTSFDEEEDGEAMMQRWDLHWNNDDNVDIWSSFAESCPSPSSLDPLLHLSV
BniB042960	CDS	ATGGCGAATTCGTGTTTGAAAGGAGGTAGATTCAGCGCGCCAGGTTTCCGGTTTCACCCTACCGATGAGGAGTTGGTGGTGTATTATCTGAAGAGGAAGATCTGTGGGAGGAAGCTTAGAATCAATGCCATAGGTGTCGTTGATGTCTACAAAGTGGATCCTACCGAGTTGCCTGGTCTGTCGGTGTTGAAGTCTGGCGATCGGCAGTGGTTCTACTTCACCCCAAGGAACAGAAAGCATCCAAACGCAGCTAGGTCGAGCAGAGGCACCGCAACTGGGTATTGGAAGGCAACGGGAAAAGATAGAGTCATCGTGTACAACTCGAGATCCGTAGGACTCAAAAAGACTCTTGTTTTCTATAGAGGTCGCGCTCCTAATGGTGAGCGTACCGACTGGGTT…
	PROTEIN	MANSCLKGGRFSAPGFRFHPTDEELVVYYLKRKICGRKLRINAIGVVDVYKVDPTELPGLSVLKSGDRQWFYFTPRNRKHPNAARSSRGTATGYWKATGKDRVIVYNSRSVGLKKTLVFYRGRAPNGERTDWVMHEYTMDEEELGRCKNAKEYYALYKLYKKSGAGPKNGEEYGAPFQEEEWVDDDDDDDREEADNVTVPDDHVVRYENNRRLGDGIFCNPVNVQSDDLDKLLSGIPYAPGIAPRQMNDLSGVMQVNSQEEIQSTLLNDSSGGFLSPWEVGMFLPNCQPNSIHSSYQPHAANSFDGSEVKSAFKASGTAPFVFEKEDYIEMDDLLTPEQGAASVEKPAQFSNPGEYEHFNDYDQLFHDVSMSFDTEHVFQGTSTDVTSLSNLSNDGRQH…
BniB042961	CDS	ATGGAGGATCCTTCTCCAAATTCATGTTTCAAAGAGGGTAAATTCACCGCACCAGGGTTTCGATTTCACCCGACTGACGAGGAGCTTGTCATGTACTATCTCAAGAGGAAGATCCACAGAAAGAGGCTCACAGTCAATGCCATCGGCGTCGTTGATGTTTACAAGATAGAACCTGATGACTTGCCTGGTCAGTCAGTGTTGAAGACAGGAGAACGGCAGTGGTTCTACTTTACTCCAAGGAGCAGGAAGTATCCAAACGCAGCTAGGTCGGGTAGAGGCACTCCAACTGGGTATTGGAAGGCTACAGGGAAGGATCGAGTCATTGTGTACAACTCGAGATCGGTAGGACTTAAGAAGACTCTTGTTTTCTATAGAGGTAGGGCAGCTACTGGTGAGCGT…
	PROTEIN	MEDPSPNSCFKEGKFTAPGFRFHPTDEELVMYYLKRKIHRKRLTVNAIGVVDVYKIEPDDLPGQSVLKTGERQWFYFTPRSRKYPNAARSGRGTPTGYWKATGKDRVIVYNSRSVGLKKTLVFYRGRAATGERTDWVMHEYTMNEEELDRCKNAKDYYALYKLFKKSGSGPKNGEDYEDPPCVDTGRLFEPLNVQLDDFEEILNGFPRAPQPQSCINGLASSVPQVNSEEELQSTLVNSSSGEFLEPQQTGGFLPHGETYIRPSSSGMEPFVFDKEDYIEMDDLLAPELGSSSVERPAEFVNPGEYGDFNEFDQLFHDVSMSLDMEPIAQGTSAHPSSPSKFADNTSNEKQHFLYQQFQIPENKVNDNNLDVFTDDMWFQDDDQTVLFDQPQSIPSGAF…
BniB043023	CDS	ATGAATAGGTACACATTTAACCCACTTGAAGATGAGCTCGTTAACTACTACTTGAATAACAAGATCAGAGAAAATGATGATCCTGATGGGAAACAAATAAACGAGGTCAACATATGTCACCATGAACCAGCAGATTTACCCGGTGGGCTGGCGAAAATAGAATCGAGTCACACTTGGTACTTCATATCGCCAGTAGAGAAGTTCGGAAAACTCAACCGGAGGAAGAGGGCATCAAAGACAGGACACTGGAAGATAACGGGGAATAGCTGTACCATTAAGGACACTGATGGTTACCCTATAGGTTTAAAGAAGTTTCTTGTGTTCCAAGAAAACAAAAAAAGAAGATCGTCTACTTTACTACCCACCACAACCCAACAACACAAGTTCACTTGGATCATC…
	PROTEIN	MNRYTFNPLEDELVNYYLNNKIRENDDPDGKQINEVNICHHEPADLPGGLAKIESSHTWYFISPVEKFGKLNRRKRASKTGHWKITGNSCTIKDTDGYPIGLKKFLVFQENKKRRSSTLLPTTTQQHKFTWIIHEFHSFLHHSNKDAFVLCKLKKKTRSRSGVAVDASPAVTDLSPTIISDPILNHSQMLTHNKDPVEDYGGDYCNDLEELIPEIDSSRWLDHSYQFDNNH
BniB045377	CDS	ATGATGCTTGCGGTGGAAGATGTGTTGAGTGAGCTCGCCGGAGAAGAAAGAAACGATAGAGGGTTGCCACCAGGCTTCCGGTTTCACCCAACAGACGAAGAGCTCATAACTTTCTACTTAGCTTCCAAAGTCTTCCATGGAGGTCTCTGTGGCATTCACATAGCCGAAGTTGATCTCAACCGCTGCGAACCTTGGGAACTCCCCGAAATGGCCAAGATGGGAGAGAGAGAGTGGTACTTTTACAGTCTAAGGGATAGAAAATATCCCACGGGGCTAAGGACAAATAGAGCCACAACCGCTGGATACTGGAAGGCTACCGGAAAAGATAAGGAAGTCTTTGCCGGCGGCGGCGGAGGAGCGCTTGTCGGGATGAAGAAGACGCTTGTGTTCTACAAGGGT…
	PROTEIN	MMLAVEDVLSELAGEERNDRGLPPGFRFHPTDEELITFYLASKVFHGGLCGIHIAEVDLNRCEPWELPEMAKMGEREWYFYSLRDRKYPTGLRTNRATTAGYWKATGKDKEVFAGGGGGALVGMKKTLVFYKGRAPRGLKTKWVMHEYRLETDLSHRHTCKEEWVICRVFNKTGDRKNVGIHNQISYLQNTSLSTTHRHDNHNHYQHLEILPPLLEPSKTLTNFPSLLYDDTHQNYNNNILNGSSGHNVDEFKALINPVVSQLNGVIFSPENGNYNNEEDNNFGVKTEQYSNGGNNDLDVRDYLDNPFFQEAGYGLLGLSSSPGPLMLLDSPYVL
BniB045438	CDS	ATGGCGGTTGTTGTTGATGAAGGCTTGGTGTTGAATCATGGAGGTGAAGAGCTTGTGGATTTACCACCTGGATTCAGGTTTCATCCAACAGATGAAGAGATCATAACATTCTATCTCAAAGAAAAGGTTTTAGATAGCCGATTCACGGCTGTGGCCATGGGTGAAGCAGATCTCAACAAGTGCGAGCCCTGGGATTTGCCGAAGAGGGAAAAGATGGGGGAGAAAGAGTTTTACTTCTTCTGTCAAAGGGACAGGAAGTACCCGACCGGGATGAGGACGAACCGTGCAACCGAGTCCGGATATTGGAAAGCGACCGGGAAGGATAAGGAGATCTTCAAAGGCAAAGGTTGTCACGTCGGGATGAAGAAAACACTTGTGTTTTATAGGGGAAGAGCTCCA…
	PROTEIN	MAVVVDEGLVLNHGGEELVDLPPGFRFHPTDEEIITFYLKEKVLDSRFTAVAMGEADLNKCEPWDLPKREKMGEKEFYFFCQRDRKYPTGMRTNRATESGYWKATGKDKEIFKGKGCHVGMKKTLVFYRGRAPRGENTNWVMHEYRLEGKYSYHNLPKSTRDEWVVCRVFHKNNPSTTTQQMTRIPIENLTRMDSLENIDHLLDFSSLPPLIDPSFTGQHDQPNFKPINPPTYDISSPIQTHHFNSNYQSIFNHQGFGSASGSGSTYNNNKEMIKMEQSLVSVSQETCLSSDVNATTSTEVSSGPVMKQEISLTGMVNGSNSYEDLCDLRGILWDY
BniB048311	CDS	ATGGGAGAGAGAAACAACGATGGTGATCAGAAAATGGAGGAAGTATTGTTGCCTGGATTCAGGTTTCATCCAACTGATGAAGAGCTAGTAAGCTTTTACTTGAAGCGGAAGGTTCAACACAACCCTCTCTCCATTGAACTCATACGACAACTCGATATCTACAAATACGACCCCTGGGATCTTCCAAAGTTTGCGACGGGTGAAAAGGAATGGTACTTTTATTGTCCGAGGGACAGGAAGTATAGGAACAGCTCGAGACCGAACCGAGTGACTGGAGCCGGTTTCTGGAAAGCCACGGGAACGGACAGGCCGATATACTCGTCGGAAGGAAACAAATGCATAGGTCTAAAGAAGTCATTAGTGTTCTACAAAGGAAGAGCTGCAAAAGGAGTTAAGACT…
	PROTEIN	MGERNNDGDQKMEEVLLPGFRFHPTDEELVSFYLKRKVQHNPLSIELIRQLDIYKYDPWDLPKFATGEKEWYFYCPRDRKYRNSSRPNRVTGAGFWKATGTDRPIYSSEGNKCIGLKKSLVFYKGRAAKGVKTDWMMHEFRMPSLSEPSPSSKRFFDSPVSPNDSWAICRIFKKTNTTTLRALSHSFVSSLPSETSMDTMSSDQNQSNTSHFSSDKILKTSSHFQFHHENMNSTPKTSTSPTSHVTTINPFSYLDFTSYEKSTNVFNPVSCLDQQYLTNLFLPTQETQPQFPRLASSNELPSFLLNMSSSDSAFLGECTGQIDLSVMLQDQCPALVSLPQEYQEKGHEENGEIKNMGGCNGDHHNHYGTPRFGDIGSTFEENHRHHYQDVKHNMTLLES…
BniB005174	CDS	ATGGGTCGCGAATCTGTGGCTGTGGTGTCTTCTCCGCCGACGGCGACTCCGACTCCGAGGGGAACTACTGCTGTGGCGGCGACATCGCTTGCTCCTGGGTTTCGATTTCATCCGACAGACGAGGAGCTCGTGAGCTATTACTTGAAGCGAAAGGTTATGGGTAAACCCGTACGTTTCGATGCGATTGGGGATGTCGATATCTACAAGCATGAGCCTTGGGACTTAGCAGTGTTCTCGAGGTTGAAGACGAGAGACCAGGAATGGTACTTTTACAGCGCGTTAGATAAGAAGTACGGGAACGGCGCTAGGATGAACCGAGCCACTAACAAAGGCTACTGGAAAGCAACTGGAAAAGACCGTGAAATACGCCGTGACATTCAGCTGCTCGGTATGAAAAAG…
	PROTEIN	MGRESVAVVSSPPTATPTPRGTTAVAATSLAPGFRFHPTDEELVSYYLKRKVMGKPVRFDAIGDVDIYKHEPWDLAVFSRLKTRDQEWYFYSALDKKYGNGARMNRATNKGYWKATGKDREIRRDIQLLGMKKTLVFHSGRAPDGLRTNWVMHEYRLVDYETESNGNLVQDAYVLCRVFHKNNIGPPSGNRYAPFLEEEWADDGIALIPGVDVRVRAEPLPLANGTNQMDQSASKDLININEPPRETAPMDIELNIQNHHENAPKTQENNNSNYHDEAEEALKLEQAEEDERPPPVCVVNKEAPLPLLQYKRRRQNEPNSNNNSSRTTQEHCSSTTTTVDNTPPPTLVSSSSAAAATNTAISALLEFSLMGISAKKEKNQQPPNKEASPHAPFPSPEEK…
BniB006222	CDS	ATGGATTACGATGAGATAGTAGAAGATGAAGAGCAAATTGATCTGCCACCTGGATTCAGATTTCACCCTACTGACGAAGAACTCATAACTCACTATCTCAAACCAAAGGTCTTCAACACTTTCTTCTCTGCCACCGCCATTGGTGAAGTTGATCTCAACAAGATCGAGCCTTGGGAGTTACCAAGGAGAGTGAAGATAGGGGAGAAAGAATGGTATTTCTTTTGTGTGCGAGACCGGAAATACCCAACCGGTTTGAGAACAAACCGGGCAACTGAAGCCGGTTACTGGAAAGCCACAGGCAAAGATAAAGAGATTCTCAAGGGGAAATTACTTGTGGGTATGAAGAAGACTCTGGTTTTCTACAAAGGAAGAGCTCCTAAAGGAGTAAGAACCAACTGG…
	PROTEIN	MDYDEIVEDEEQIDLPPGFRFHPTDEELITHYLKPKVFNTFFSATAIGEVDLNKIEPWELPRRVKIGEKEWYFFCVRDRKYPTGLRTNRATEAGYWKATGKDKEILKGKLLVGMKKTLVFYKGRAPKGVRTNWVMHEYRLEGIYSIQHLTETAKNDWVICRVFHKRADGTKVDMSQLMLLDSHINRIEPIELPSLMDCSQRDSFPGSSTHVTCFSDQETEDKRLIHHESKDGSGPLFYPDPLFLQDNDSLMKLLLNSHETQFPGTDPSGLAGTGESSCFWNF
BniB008334	CDS	ATGTTGGCGTTGGAGCAACCTCCTCTTGTGTGTTGCCCACAAATGGATATTGATGTGTTCAATGGTTGGGAGAGATCAAGATTTGAAGATGAAACCATAATGCCACCTGGGTTTAGATTTCATCCGACAGATGAGGAGCTCATCACTTACTACCTCCTCAAGAAAGTCATTGACTCCAGTTTCTCCTGTGCCGCCATTTCTCAAGTTGATCTCAACAAGTCTGAGCCTTGGGAGCTTCCTGAGAAAGCGAAGATGGGGGAGAAGGAGTGGTACTTCTTCACACGAAGAGATAGGAAGTACCCAACGGGACTGAGAACGAACAGAGCAACAGAAGCTGGTTACTGGAAAGCAACTGGTCAAGACAGAGAGATCAAAAGCTCAAAGACAAAATCGCTTCTC…
	PROTEIN	MLALEQPPLVCCPQMDIDVFNGWERSRFEDETIMPPGFRFHPTDEELITYYLLKKVIDSSFSCAAISQVDLNKSEPWELPEKAKMGEKEWYFFTRRDRKYPTGLRTNRATEAGYWKATGQDREIKSSKTKSLLGMKKTLVFYKGRAPKGERSCWVMHEYRLDGKFSYHYITSSAKDEWVLSKVCLKSSVVSRETKLISSSSISVAGEVYSGISCSCSTGSLIGPVIDALATKHVSCFSNTFSASHVDASFPTYLPAPPPSLPRQHRPVDQDVAFGQFMGLGSSSGQFNMDAAFLPNLPSLPPTVLPPPQSYALYGGAAVSSWPFAL
BniB008812	CDS	ATGAAAGTTCGTAATGTACGGTATGTACCTGAGGAGTGTCATGATATCTTCTCAAAACATCCTCGTGACTTGCCTGGCTACCCAAGAGAAACGGATTGGTACTTTTATTGCAGAAAACTTAGTAGCCAAGTTAGTACTCATAGTATTTGGAAACAAATCGGAGAAGAAACTGATGTTTTAGATCCAAACAATAATGATGCATTAGTCGGTATCAAACGTCCATTTACTCTTGTTGATCACGAAGAAGAGTCCGATGATATTCTTTTGTCAGATGAAGACGAACCTTCACAATATAATTGGTTTATGGATGAAATTAGCCTCCCATTAACAGTTTCAGAGTCTGATTGGGTTTTGTGCCATGTTTTCCGCAAAATCAAACCTGAATTAGAATCCGGAAAA…
	PROTEIN	MKVRNVRYVPEECHDIFSKHPRDLPGYPRETDWYFYCRKLSSQVSTHSIWKQIGEETDVLDPNNNDALVGIKRPFTLVDHEEESDDILLSDEDEPSQYNWFMDEISLPLTVSESDWVLCHVFRKIKPELESGKEEEESVVAKSLDLLRENDGNVLPPSPSPL
BniB008872	CDS	ATGGGTATTCAAGAACTTGACCCGTTAACCCAGCTAAGCTTACCACCCGGTTTTCGGTTTTACCCGACGGACGAAGAGCTGATGGTTGATTATCTATGCAGAAAAGCTGCCGGTCACGACTTTTCTCTCCAGCTCATCGCCGAGATTGATCTCTACAAGTTCGACGCGTGGCTTGATGATTGGGTTTTATGCCGAATATACAAGAAGCAGACAAGCGCACAAAAAGAGGCTTACGGTAATCCAATGACGAGTGCAATTGAATACAGCAGCAACAATGGTTCGTCGACATCAACCTCATCTCACCAATACGACGACGTTCTTGAGTCCTTGCATGAGATAGACAACAGAAGTTTGAGTTACGCCGCCGGTTCATCAAACTCGGTTCCTCATTATAGTCAT…
	PROTEIN	MGIQELDPLTQLSLPPGFRFYPTDEELMVDYLCRKAAGHDFSLQLIAEIDLYKFDAWLDDWVLCRIYKKQTSAQKEAYGNPMTSAIEYSSNNGSSTSTSSHQYDDVLESLHEIDNRSLSYAAGSSNSVPHYSHRPRLTEQKTGFLNLAREPSYGWTNFGGHNTVPELGESHNVPSLRYGDGGGHFHGVKTNEEDDKTQRQQADGIPRFDNSGVLAHGQSFSVDPVNGFGYSGQQPSGFGFM
BniB008873	CDS	ATGGAGAGCAACGATTCTTCCGGTGGTCCTCCACCGCCACCCCAGCCTAACCTTCCTCCAGGATTCCGGTTTCACCCAACCGACGAAGAACTAGTCGTTCACTACCTCAAACGCAAAGCCGCCTCGGCTCCTTTACCTGTCGCCATCATCGCTGAAGTTGATCTTTACAAATTCGATCCATGGGAACTTCCAGCCAAGGCATCGTTTGGTGAGCAAGAATGGTACTTCTTCAGTCCTAGAGATCGGAAGTATCCGAACGGAGCTAGACCGAACAGAGCGGCAACGTCAGGGTACTGGAAAGCGACGGGTACCGACAAACCGGTGCTAGCCTCCGACGGGAACCAGAAGGTCGGCGTAAAAAAGGCACTCGTCTTCTACAGTGGCAAACCTCCAAAAGGT…
	PROTEIN	MESNDSSGGPPPPPQPNLPPGFRFHPTDEELVVHYLKRKAASAPLPVAIIAEVDLYKFDPWELPAKASFGEQEWYFFSPRDRKYPNGARPNRAATSGYWKATGTDKPVLASDGNQKVGVKKALVFYSGKPPKGIKSDWIMHEYRLIDNKLNNRPPGCDFGNKKNSLRLDDWVLCRIYKKNNAGRHVDNDKDHDMIDYIFRKIPPPLSMVGLHHNVSRSVNFFPGGYGVFSDGDHGLYDGSGMINNNNMAVCSNGAGSVNGDPNAVGNSLNPVSASSGPVMVANLKRALPVPFWPVAEEEQDASPSKRFHGGAGGGDCSNMSSSMMEETPPLMQQGGVLGDGLFRTTSYQLPGLNWYSS
BniB010712	CDS	ATGGAGGAAATGATGGGATCGTGGGACAAAAGAAAGGAAGAACAACAAGAAGAGGAAGAACAAGTATCAAAGCTTCCAGGTTTTAGGTTTCATCCGACCGATGAGGAGCTTGTAGGGTTTTATCTCTCTAAGAAAGTACTACTCAAGAAATCCAGCAAGATCGATGAGATCATCAGTCAAATCGATATCTATAAATTCGATCCATGGGATCTTCCTCGATCGAGGAATATGGAGAAGGAAAGCTACTTCTTCTGCCAGAGAGGAAGGAAGTACCGAAACAGCATAAGACCAAACCGAGTGACAGGTTCCGGTTTCTGGAAAGCCACGGGAATAGACAAACCTGTCTATTCTGATGGATCCAGAAAAGACGTGATCGGTCTAAAGAAGACACTCGTTTAT…
	PROTEIN	MEEMMGSWDKRKEEQQEEEEQVSKLPGFRFHPTDEELVGFYLSKKVLLKKSSKIDEIISQIDIYKFDPWDLPRSRNMEKESYFFCQRGRKYRNSIRPNRVTGSGFWKATGIDKPVYSDGSRKDVIGLKKTLVYYLGSAGKGSKTDWMMHEFRLPTANDTIPGGSTHRSPTPSSLLHAEVWTLCRIFKRNVSSIKYTPDWKELASGKRVKPQQSKYQEAAYISFGDDESSTNKIMESKENHERNVFQLHQTPHQHQPILMECTSTQVNNTVPHDISNDSNMDDINYENWDELRSVVEFAFGPSSLS
BniB010715	CDS	ATGGGATTGGAATTTAGACAAGGGAAAGCTACCGTTTTGTTGGCTATCTCTGGTATTCCCCAGCCTTATTTTGAGCTCCAAGAAGGGAGCCTGTTCTCGAATTTTAGTTACTTCATGGACAAGGCGTCGGGAAGAAGGGGAGAAACCAAGGATAAGCAAGCATGGCCGTGGATATGCTGGTATTTGTGGGAAAGCAGGAATGATTTTCTGTTCAATGGGGTTAGATGGACGCCTACTGGGATCATTTTAAAAGCGCAAGAAGAAGCAGAGGCATGGTTCCTGGCTCAAGTGGTGGACAAGGAATTAGCTACTGAAGTGGTAATACCGCAGTGTCAAAACGCACGAAGATGGTCACCCCCTGAGCCTAGTTGGCTAATGTGCAATGTGGCTTTTGAATGG…
	PROTEIN	MGLEFRQGKATVLLAISGIPQPYFELQEGSLFSNFSYFMDKASGRRGETKDKQAWPWICWYLWESRNDFLFNGVRWTPTGIILKAQEEAEAWFLAQVVDKELATEVVIPQCQNARRWSPPEPSWLMCNVAFEWNKDNRVLGTAWVVRSHRDVVISHSRRAFSDVESLEVARLSTCLWALESMTSMHYNRVVFAGDFKELFSAFRKPHEWPAWRFQVEEMNRLLVLMEEYQLKVEMEAEEENKGSISMVEAKLPPGFRFHPRDDELVCDYLMKRNVRSLYQPVVLIDVDLNKCEPWDIPQTARVGSKEWYFYSQKDRKYATGQRTNRATATGYWKATGKDRAIQRNGSLVGMRKTLVFYRGRAPKGRKTDWVMHEFRLQGTSIHHSSKEEWVLCRIFNKN…
BniB011492	CDS	ATGAATTCGTTTTCCCACGTCCCCCCGGGTTTTAGATTTCACCCAACAGACGAAGAACTTGTAGACTACTACCTGAGGAAAAAAGTTGCATCGAAGAGAATAGAAATCGATTTCATAAAAGACATTGATCTTTACAAGATTGAACCATGGGATCTTCTAGAGTTGTGCAAAATTGGTCATGAAGAGCAGAGTGATTGGTATTTTTTTAGCCATAAAGACAAGAAGTATCCCACAGGGACTCGAACCAATAGAGCAACCAAAGCAGGGTTTTGGAAAGCCACAGGAAGAGATAAGGCTATATACTTGAGGCATAATCTTATTGGCATGAGGAAAACACTTGTGTTCTACATGGGGAGAGCCCCAAATGGACAAAAATCTGATTGGATCATGCATGAATAC…
	PROTEIN	MNSFSHVPPGFRFHPTDEELVDYYLRKKVASKRIEIDFIKDIDLYKIEPWDLLELCKIGHEEQSDWYFFSHKDKKYPTGTRTNRATKAGFWKATGRDKAIYLRHNLIGMRKTLVFYMGRAPNGQKSDWIMHEYRLETDENGAPQEEGWVVCRVFKKRLPAVIRRMGDYDSSPSHWYDEQLSFMASDLETNGPRRLVPNHHQQYQQPLPYGLNASTYALNNPNLQCKQELELQYNHLQSNLAHAEQLTQGNPSFSSLYVNSGNEQTMDQVTDWRTLDTQLSNEDAAIASASLQNNAKDTSNVEYQIDEEKDQKKVSDMEEAYAASTSSNCQIDLWK
BniB014040	CDS	ATGGAGGAAATGATGGGATCGTGGGACAAAAGAAAGGAAGAACAACAAGAAGAGGAAGAACAAGTATCAAAGCTTCCAGGTTTTAGGTTTCATCCGACCGATGAGGAGCTTGTAGGGTTTTATCTCTCTAAGAAAGTACTACTCAAGAAATCCAGCAAGATCGATGAGATCATCAGTCAAATCGATATCTATAAATTCGATCCATGGGATCTTCCTCGATCGAGGAATATGGAGAAGGAAAGCTACTTCTTCTGCCAGAGAGGAAGGAAGTACCGAAACAGCATAAGACCAAACCGAGTGACAGGTTCCGGTTTCTGGAAAGCCACGGGAATAGACAAACCTGTCTATTCTGATGGATCCAGAAAAGACGTGATCGGTCTAAAGAAGACACTCGTTTAT…
	PROTEIN	MEEMMGSWDKRKEEQQEEEEQVSKLPGFRFHPTDEELVGFYLSKKVLLKKSSKIDEIISQIDIYKFDPWDLPRSRNMEKESYFFCQRGRKYRNSIRPNRVTGSGFWKATGIDKPVYSDGSRKDVIGLKKTLVYYLGSAGKGSKTDWMMHEFRLPTANDTIPGGSTHRSPTPSSLLHAVSLQPTQTS
BniB017244	CDS	ATGAGTGGTGAAGGTAAGTATCAGGAAGAAGAAGATGAAACAACACTTCCTGGATTCAGATTTCATCCTACGGACGAAGAGCTTTTAGAGTATTATCTTCGAAGAAAAGTAGAAAACAAACCCATCAAACTCGAGCTTATCAAACAGATCGATATCTACAAGTTCGATCCTTGGGATCTTCCAAGAGTGAGCAACGTTGGGGAAGAGTGGTACTTCTTCTGCATGAGAGGCAGGAAATACAAGAATAGCGTTAGACCAAACCGGGTTACCGGTTCAGGTTTCTGGAAAGCCACCGGCATTGATAAACCGGTTTACTCCAAACTTGACTGCGTCGGCCTAAAGAAATCTCTAGTTTACTATCTTGGTTCAGCCGGTAAGGGCTCCAAAACCGATTGGATG…
	PROTEIN	MSGEGKYQEEEDETTLPGFRFHPTDEELLEYYLRRKVENKPIKLELIKQIDIYKFDPWDLPRVSNVGEEWYFFCMRGRKYKNSVRPNRVTGSGFWKATGIDKPVYSKLDCVGLKKSLVYYLGSAGKGSKTDWMMHEFRLPSTTKSESSPQQAEVWTLCRIFKRVTHHRNPTIVQPNRRPVITLTDSCSMTSSLDSDHTSHHKLHEPQLQPHNPYWNQPTTVCFNQPTYTCHDNNFLNLWNISGEDFIVDASSWDELSSVVDGTTKHL
BniB020166	CDS	ATGGAAAAGCTAAGCTATATTAAGAAGAACAGAGGACTAAAATTACCACCCGGGTTCAGATTTCACCCGACGGACGAAGAGCTAGTAGTTCAGTATCTACTTCGAAAAGTGACCGGTTTACCCTTACCAGCTTTTGTTATACCGGAAATTGATATATGTAAAGCCGATCCATGGGATTTGCCAGGTGATTGTGAGTCAGAGAGGTATTTTTTTAGCACGAGGGAAGCTAAATACCCAAACGGAAACCGGTCGAACCGATCAACCGGTTCGGGTTACTGGAAAGCGACTGGAATCGATAAGCAAATAGGGGGGAAGAAGCTCGTTGGGATGAAGAAAACTCTTGTTTTCTATAAAGGGAAACCACCAAACGGGACAAGAACCAATTGGGTTCTTCATGAG…
	PROTEIN	MEKLSYIKKNRGLKLPPGFRFHPTDEELVVQYLLRKVTGLPLPAFVIPEIDICKADPWDLPGDCESERYFFSTREAKYPNGNRSNRSTGSGYWKATGIDKQIGGKKLVGMKKTLVFYKGKPPNGTRTNWVLHEYRILDSQQESHGENTNWVLCRVFLKKTSNANSNKRKEDEKERKEEKESDEDDNKSACPIFYDFLRKDKKKRRCCDLNLAPTCCCCSASASSSVSSSALTQTYTHNDSDYHEEITCREIKFVLFL
BniB031639	CDS	ATGAGTGGTGAAGGTAGTAAGGATCATCATCAAGAAGAAGATGAAACAACACTTCCTGGATTCAGATTTCATCCTACAGACGAAGAACTTTTAGAGTTTTATCTTCGAAGAAAAGTGGAGAACAAACCCATCAAACTCGAACTTATTAAACAGGTCGATATCTACAAGTACGATCCTTGGGATCTTCCGAGAGTGAGCAGCCTTGGGGAAAAGGAGTGGTACTTCTTCTGCATGAGAGGAAGGAAATACAGGAATAGCGTTAGACCAAACCGAGTCACTGGTTCAGGTTTCTGGAAAGCCACTGGTATTGATAAGCCGGTTTACTCCAATCTTGACTGCGTCGGTCTAAAGAAATCTCTGGTTTACTATATTGGTTCAGCCGGTAAAGGCACCAAAACC…
	PROTEIN	MSGEGSKDHHQEEDETTLPGFRFHPTDEELLEFYLRRKVENKPIKLELIKQVDIYKYDPWDLPRVSSLGEKEWYFFCMRGRKYRNSVRPNRVTGSGFWKATGIDKPVYSNLDCVGLKKSLVYYIGSAGKGTKTDWMMHEFRLPSTTKTDLPVQQAEVWTLCRIFKRVTHQRNPTIVQSNRKPVITLADSCSKTSSLDSDHTSHRVIDSLSHKPHEPQLQLQPQTQNPYWNQLTRFDFNQPTYTCHDNSFLSFGNINGGDFIGDSASWDELRSVIDGNTKH
BniB032464	CDS	ATGATAAGCAAGGATCCAAGATCAAGTTTGCCACCAGGGTTTCGATTTCATCCAACTGATGAAGAACTCATTCTTCATTACCTAAGGAAGAAGGTTTCCTCTTTACCAGTACCGCTTTCTGTCATCGCAGATGTTGATATCTATAAATCTGATCCATGGGATCTACCAGACAAGGCTCCATTTGGAGAAAAAGAATGGTATTTTTTCAGTCCGAGGGACAGGAAGTATCCAAACGGAGCAAGACCAAACCGAGCGGCTGCGTCTGGATATTGGAAAGCCACCGGAACAGATAAATTAATCGCGGTGCCAAACGGTGGAGTTCATGAAAACATTGGTATAAAAAAAGCTCTTGTGTTCTATAGAGGAAAGCCTCCAAAAGGTGTTAAAACCAACTGGATC…
	PROTEIN	MISKDPRSSLPPGFRFHPTDEELILHYLRKKVSSLPVPLSVIADVDIYKSDPWDLPDKAPFGEKEWYFFSPRDRKYPNGARPNRAAASGYWKATGTDKLIAVPNGGVHENIGIKKALVFYRGKPPKGVKTNWIMHEYRLTETQSPKRVGSSTSVSQVDNLGDRSLKSKEYSMRLDDWVLCRIYKKSHTSLSSPDVASAISNQEHEENDKEPFLVSETLLPNLENNQTLKRQKSSFSTLLDATDLTFLANFLNETPENHTESEFSFMFENFSNPNLDQKLPWLSPPSPETSFIGNKRERMDYAEETTNTSKKMINNFSYNNSIDHLDHRMVQQSNFLNQDFLMSPRLPYQG
BniB032466	CDS	ATGGTGGAAGAAGTAGCAGTAATTGTGAACCAAGGAGGAGATCACGAGGCGGTGGATTTGCCTCCGGGGTTTCGGTTTCATCCAACTGATGAAGAGATCATAACTCACTACCTTAAAGAGAAAGTCTTCAACGTCCGGTTCACCGCGGCTGCAATTGGCCAAGCCGACCTTAACATGAACGAGCCTTGGGATCTACCAAAAATTGCAAAGATGGGGGAGAAGGAGTTTTACTTCTTTTGCCAGAGGGATAGGAAGTACCCGACCGGCATGAGGACGAACCGTGCAACCCTGTCCGGTTACTGGAAGGCGACCGGGAAGGACAAGGAGATCTCTAGAGGCAAAGGTTGTATTGTTGGGATGAAGAAAACACTTGTGTTCTATAGAGGAAGAGCTCCAAAA…
	PROTEIN	MVEEVAVIVNQGGDHEAVDLPPGFRFHPTDEEIITHYLKEKVFNVRFTAAAIGQADLNMNEPWDLPKIAKMGEKEFYFFCQRDRKYPTGMRTNRATLSGYWKATGKDKEISRGKGCIVGMKKTLVFYRGRAPKGEKTNWVMHEYRLDGIYSYHNLRKSSRDEWVVCRVFHKNAPPPTTNTTTTTNQLIRIESLENINHLLDFSAPPHLIDPGFLGQPGPSFPGAGQQSNLKPILHHPPSAAINNSYLSAQTVNHTYHSVLNSRSGLVYGTGSGNNNNGMIKLEHSLVSVSRETGLSSDMNTTATPETCSYTRMVNSAANEAMMDGNKTSYDDDDLGIFWDDYKLI
BniB038893	CDS	ATGGAACAAGGAGATCATCAGCAGCAGAAGAAAGAAGAAGAAGCTTTGCCTCCGGGGTTCAGGTTTCATCCAACAGATGAGGAGTTAATCTCGTATTACTTGGTTAATAAGATCGCTGATCAAAACTTCACCGGAAAAGCAATTGCCGACGTTGATCTCAACAAGTCCGAACCATGGGAACTTCCTGAGAAGGCGAAAATGGGAGGCAAAGAATGGTATTTCTTTAGTCTACGCGACCGAAAGTACCCGACGGGTGTGAGAACAAATCGGGCAACAAATACTGGGTATTGGAAAACCACAGGGAAAGACAAAGAGATATTCAATAGCACAACCTCGGAGTTGGTCGGAATGAAGAAGACATTGGTCTTCTACAGAGGAAGAGCTCCTCGTGGGGAGAAG…
	PROTEIN	MEQGDHQQQKKEEEALPPGFRFHPTDEELISYYLVNKIADQNFTGKAIADVDLNKSEPWELPEKAKMGGKEWYFFSLRDRKYPTGVRTNRATNTGYWKTTGKDKEIFNSTTSELVGMKKTLVFYRGRAPRGEKTSWVMHEYRLHSKSSYRTSKQDEWVVCRVFKKTEATKKYISNSSSSTSHHHQNHTRASILSTNNNNPNYSSDLLQLPPHLQPHANLNINQTIMANAVHLAELSRVFRGSTSSTMDSAHQQLMSYNQMPVSGLNLNLGGALVQPPPPTVSLEDVVAVSASFNGENGFGNVEMSQCMDLDGYWPPY
BniB039382	CDS	ATGGAAGAAAATCTTCCTCCAGGATTCAGATTTCATCCTACAGACGAGGAGCTCATAACGCATTATCTTTGTCGGAAAGTCTCCAATACTGGATTCACCGGTAAAGCTGTCGTCGACGTTGATCTGAACAAGTGTGAACCTTGGGATTTGCCAGCTAAGGCTTCAATGGGAGAGAAAGAATGGTACTTCTTCAGCTTAAGAGATCGGAAATACCCAACCGGTTTAAGGACAAACCGAGCAACTGAAGCCGGTTATTGGAAAACTACCGGTAAAGATAAAGAGATATACCGAAGTGGAGTGCTGGTTGGGATGAAGAAAACCCTAGTTTTCTACAAAGGAAGAGCTCCAAAGGGTGAGAAAAGCAATTGGGTTATGCATGAATATAGGCTTGAGAATAAA…
	PROTEIN	MEENLPPGFRFHPTDEELITHYLCRKVSNTGFTGKAVVDVDLNKCEPWDLPAKASMGEKEWYFFSLRDRKYPTGLRTNRATEAGYWKTTGKDKEIYRSGVLVGMKKTLVFYKGRAPKGEKSNWVMHEYRLENKQPFTPAKEEWVVCRVFQKSTTIKKPQEQHPQSSFGSPCDANSSMANEFKDIELPNLNSNSSSVGFSHIHDHQYPQNNVYSEDHITSTVAGLNMNMNMNMGTNIPSWTTSLLGPPLSPINSLLLKAFQIRNSYSFPKEINPSLFQQGVSSIMQNGSSSSQPQPQEEAFNMDSMW
BniB043851	CDS	ATGGAAAAGATTGGTTCTGTCTCTTTCACGAGGTCTTCAAACTTTGAAGAGGGGTCATCATCTTCCCAAAATCACGTGAACAATCTCGAGGAAGAGCAAAGACTCATGATGTTTCGTTCTCGTTATCATCGCACCGTACAAGCCATGCCTCATCCTCCGGTGTATCCGCCCGGTTCACGGTTTCTTCCAACGGACTTGGGGTGTGTAAGGGTTCATCTTAGAAACAAGGTCGAGAAGAACAAGAGCGGTTTCATAACAACTTTGGATCTGTACAAAGACGACCCGTGGCTTCTTGATCACGTGCACAACGATCTGTTCCCTAGAGGCGAATGGTACTACTTTACTCCTAGGAACAAAAGAGGTTCCAGTTCATGTAACAGGACCGTTCGGGGAAGAGGA…
	PROTEIN	MEKIGSVSFTRSSNFEEGSSSSQNHVNNLEEEQRLMMFRSRYHRTVQAMPHPPVYPPGSRFLPTDLGCVRVHLRNKVEKNKSGFITTLDLYKDDPWLLDHVHNDLFPRGEWYYFTPRNKRGSSSCNRTVRGRGGGTWRSTSGKEAIFDKDDKVQGYKQDLVYNKTNVNGKIKPTGWNMTEYCLHEENQDDLVLCHIKGDIKKKGFAEEVKENNILSDQVQNPEEEEAGANGVEMRRTLQEDHQQQQQQEQDTPSVLSIPPPHDGGQGLGVQTTQNNDHDLMLQEDHGDATQQQQQHPQEQDGPPVLFIPPDEYRNSEHLMTMQNNLMTTTLLQLNHGEQQQQQEQDAPPVLVPPPPHEGRDSGFERMINNDNNFMTTMMLQEDHGDATLKQQQQEQDAP…
BniB043867	CDS	ATGGAGAAGATGAATAGAGAACAAAGTAAATCAAAGGTTGATGAATCTTCATCAAAGTCTAACTCTGTTCTTGGTCGTGATGAGGGTTTTGGTTCTGTCTCTTCAAACTTTGAAGTGGGATCTTCTTCTTTCCATAGCCACGTCAACAGTCTCCACGTCAACAGTTCCCAAGGCATGCCTCATCCTCCGGCTTTCAACCAACATGTCAACAATTATCACAGGAACAATCTCGAGGAACAGCAGAGACACAGGCTTCGCTATCGTCGCATCATGGAACGCATGCCTCGTACCCAACATACCGATCCCAGCAGCAGCTCCAACACTGTGAAGGCTCCGGTTTATCCGCCTGGTTCACAGTTTCTTCCAACGGACTTGGGGTGTGTAAGGGTTGATCTTAGA…
	PROTEIN	MEKMNREQSKSKVDESSSKSNSVLGRDEGFGSVSSNFEVGSSSFHSHVNSLHVNSSQGMPHPPAFNQHVNNYHRNNLEEQQRHRLRYRRIMERMPRTQHTDPSSSSNTVKAPVYPPGSQFLPTDLGCVRVDLRNKVKKNKSGFITTLDLYKDDPWLLDHVHNDLFPRGEWYYFTPRTKRGAKTTIRAVRGSGGGTWKSTSGKEAIKDKEGKVQGYKQSLVYNKADANGDMKPTGWNMKEYCLHEENQDDLVLCHIKGDIKKKGFVEAVKKNNILSDQVQNPEEEVAGANGVEMRRTLQEDHQQQQQQQEQDTPLVLSVPPPHDGQGLGVETTHNNDHNLMLQEDHGDATQQQQQQPQEQDSGYMMAIQNNFMKMLQINPGDGTQQQQQKEQEQDAPPVL…
BniB048832	CDS	ATGGCTCCTGTGGGATTACCTCCAGGCTTCAGATTTCATCCAACAGACGAAGAACTCGTCAACTATTATCTGAAAAGAAAAATCAGTGGTCAAGAAATCGAGCTTGATATAATCCCTGAGGTTGATCTCTACAAATGTGAGCCATGGGACCTCGCAGAGAAGTCGTTTCTTCCAAGTAGAGATCCAGAATGGTATTTTTTCGGGCCACGTGACCGGAAATATCCGAACGGGTTTAGGACGAACCGAGCAACAAGAGGTGGATACTGGAAATCGACTGGGAAAGATCGGAGAGTGACGAGTCAAAGCAGAGCCATTGGGATGAAGAAGACTTTGGTTTACTATAGAGGAAGAGCTCCTCAAGGTATCCGTACGGATTGGGTCATGCATGAGTATCGTCTC…
	PROTEIN	MAPVGLPPGFRFHPTDEELVNYYLKRKISGQEIELDIIPEVDLYKCEPWDLAEKSFLPSRDPEWYFFGPRDRKYPNGFRTNRATRGGYWKSTGKDRRVTSQSRAIGMKKTLVYYRGRAPQGIRTDWVMHEYRLDDKDCDDPSSLQDSYALCRVFKKNGICSELETEPQLQTGQCSFTTVSMEINSNNINYSNDYETMSPEVGVSSACVEDVVDDKDDSWMQFITDDAWDTSSNAAAMGHGQGVY
BniB044397	CDS	ATGACGATGATTTATCCACCAGAGGATGAAATCGTCAGTTATTATCTGAAGATGATGATCGATAAAAGAAACGCCTGGCCTAGCAACTTCCTCCGAAGCGAAGACGTGTACTGCGTCAACCCGTGGACGCATTTCAACACTCAAGAACCTTTGATCCTACACGACGGAAGATACTTGTTCGTTCACCGAACAGAGAATTCTGGTAAAACCGATGGATGTGACTCTGGTTGCTGGAGGGTCATGGGTCGTAATAAACTGATCAAGTCAGAGAAGAACGAGGAGATTCTAGGGTTCAAGAAAGTTTACAAGTTCTGTGAAAAGAACGAGGAGAAACCAAAATCGTTTTTTAAGTTCAGCTGGGAGAAGGAAGAGGAGAAGGAGAAGAGACGAGTAAGAGAT…
	PROTEIN	MTMIYPPEDEIVSYYLKMMIDKRNAWPSNFLRSEDVYCVNPWTHFNTQEPLILHDGRYLFVHRTENSGKTDGCDSGCWRVMGRNKLIKSEKNEEILGFKKVYKFCEKNEEKPKSFFKFSWEKEEEKEKRRVRDKRVWVMEEYRLASKWKQDYVICKIRLLNPNPLEFMLSNHVRGYYL
BniB032081	CDS	ATGGCGAATTCGTGTTTGAAAGGAGGCAAATTCAGCGCACCAGGGTTTCGATTTCACCCAATAGATGAGGAGCTGGTGGTTTATTACCTGAAGAGGAAGATCTGTGGTAGAAAGCTTAGAATCAATGCCATTGGCGTCGTTGATATTTACAAACTCGATCCTACCGAACTGCCTGGTTTATCGGTGTTGAAGTCTGGAGATCGACAGTGGTTCTTTTTCACTCCAAGGAACAGGAAGTATCCAAACGCAGCTAGGTCTGGTAGATGCACTGCTACTGGGTATTGGAAGGCAACAGGGAAAGATCGTGTCATCGTGTACAACTCGAGATCCGTAGGACTCAAAAAGACACTTGTTTTCTATAGAGGTCGTGCTCCTAATGGTGAGCGTACTGACTGGGTG…
	PROTEIN	MANSCLKGGKFSAPGFRFHPIDEELVVYYLKRKICGRKLRINAIGVVDIYKLDPTELPGLSVLKSGDRQWFFFTPRNRKYPNAARSGRCTATGYWKATGKDRVIVYNSRSVGLKKTLVFYRGRAPNGERTDWVMHEYTMDEEELGRCKNAKEYYALYKLYKKSGAGPKNGEEYGAPFQEEEWADDDDDDCEDADNTVAVPDDHVVRRVDDGLFCNPVNLQSDDLHKLLNEIQNAPGVAQRQMNELSGVLQGISKEEIESVFLNNSPGESLAPWEVGKSLPNTHWSFQSNMRSENSFEATQVKSAFNTSGMAPFVFEKEDYIEMDDLLLTPELGASSVEKPAQFSNPGDYGYFNEFDQLFHEVSMSLDMEPIAQEASLSSVANNGRQQFLYQKQFQDQTP…
BniB032082	CDS	ATGGCGGATTCGTGTTTAAAAGGAGGTAAATTCAGTGCGCCAGGGTTTCGATTTCATCCGACAGATGAGGAGCTGGTGATGTATTATCTGAAGAGGAAGATTTGCAAGAGAAGGCTTAGAGTCAATGCCATCGGTGTCGTAGATGTTTACAAATTGGATCCTGAAGAATTGCCTGGTCAATCGGTGTTAAAGACGGGAGATCGACAGTGGTTCTTTTTCACTCCAAGGAGCAGGAAGTATCCAAACGCAGCTAGATCTGGTAGATGCACTGCAACTGGGTATTGGAAGGCAACAGGGAAAGATCGTGTCATCGTGTACAACTCCAGATCCGTAGGACTCAAAAGGACACTTGTTTTCTATAGAGGTCGTGCTCCTAATGGTGAGCGTACTGACTGGGTG…
	PROTEIN	MADSCLKGGKFSAPGFRFHPTDEELVMYYLKRKICKRRLRVNAIGVVDVYKLDPEELPGQSVLKTGDRQWFFFTPRSRKYPNAARSGRCTATGYWKATGKDRVIVYNSRSVGLKRTLVFYRGRAPNGERTDWVMHEYTMDEEELGRCKNAKEYYALYKLYKKSGAGPKNGEEYGAPFQEEEWADDDDNEVGDNIAVRYEDTRCVDNATLFNPVTLQLDDIEEILNGIPYAPGVPQRCINGLASSIPQVNSQEELQSTLVNDSSGEFLEPQEIGDFLPNVQPYNMPSIFESTEVTSVPNDSGMGPFVFDKEDYIEMDDLLTSELGASSTEKHQQFLDPGEFGEFNEFDQLFHDVSMFLDMEPILQGASADPSSLSNTLDQEHQPLYQQFQDQTPENKLNS…
BniB032089	CDS	ATGGAATGGTACTTCTACAGCACAAGGGATAAAAAGTATCCAAATGGGTCCAGGACAAACCGTGCGACCCGAGCCGGTTACTGGAAAGCTACAGGGAAAGACCGTGCAGTAGAATCAAAGAAGATGAAGATGGGGATGAAAAAGACCCTCGTTTATTACAGAGGAAGGGCTCCGCATGGCCTTCGTACTAACTGGGTGATGCATGAATATCGCCTCACTCATCTTCCTTCTTCATCCCTATCCTCCTCTATCAAGGAGTCGTATGCATTGTGCCGTGTGTTTAAGAAGCATATACAAATTCCAAAGAGAAAGGAAGAACAGATAATTATGCTGGGTAATAGCGATGGAAAAGAGAAAGAAGAAGAATTAGAGGAGGAGAACATATGGAGAAAATGTGAT…
	PROTEIN	MEWYFYSTRDKKYPNGSRTNRATRAGYWKATGKDRAVESKKMKMGMKKTLVYYRGRAPHGLRTNWVMHEYRLTHLPSSSLSSSIKESYALCRVFKKHIQIPKRKEEQIIMLGNSDGKEKEEELEEENIWRKCDGVMMERESDEDENLKIASAETSSSELTQGILLDEANNSSSFALHFSSSLLDDHDQLFANYSHLPYYPPLQLQDFPQLSMNEVQIMSIDNSKKDFQCRDSMNGTLDEIFSFSSSATLPL
BniB038153	CDS	ATGGCTGGACGATCGTGGCTGGTTGATAGTAACCGCATTGCAACCAAAATAAAGAGTGCATCGGGTCATAATGACCCTAACAAAGTGGTGTGGAACAGCAATCCTTCAAAACACTGTCCCAACTGTCATCACCTCATTGACAACAACGATGAAGTTGATGACTGGCCAGGCTTGCCACGAGGTGTGAAATTCGATCCATCTGATCCAGAGATCATATGGCATTTGCTTGCAAAATCTGGTTTATTGGGTTTAAGCTCCCACCCTTTCATTGACGAGTTCATCCCAACTGTCAATCAAGATGATGGTATCTGTTACACACATCCTAAGAACTTACCAGGAGTTAAGGACGATGGGACTGTGTCCCACTTCTTCCACAGAGCAATCAAAGCTTACAGCACA…
	PROTEIN	MAGRSWLVDSNRIATKIKSASGHNDPNKVVWNSNPSKHCPNCHHLIDNNDEVDDWPGLPRGVKFDPSDPEIIWHLLAKSGLLGLSSHPFIDEFIPTVNQDDGICYTHPKNLPGVKDDGTVSHFFHRAIKAYSTGTRKRRKIHDDDFGDVRWHKTGRTKPVVLDGVQRGCKKIMVLYGGKAVKTNWVMHQYHLGTDEDEKDGDYVVSKIFYQQPQQLAVLKQGGGDKAEQEASDDIFAATTTPRADPVTPKLFTPEPPPQAVRLCSDSHFADDYATPHGYVAAPEVSLAEISEAVYMEDEVQGVQRNHERTSSEDEPAPETGIENRENEIMVYDEEEKENDKEDVNDQEDRGNDKEGENQAEEDPNWLDSGGSQFILDSQQLVEALSLCDDLLQDRDENT…
BniB038234	CDS	ATGGGAGAGAGAAATGATGATGGTGATCAGAAAATGGAGGAAGTATTGTTGCCCGGATTTAGGTTTCATCCAACGGACGAAGAGCTTGTAAGCTTCTACCTGAAGCGGAAAGTTCAACACCATCCTCTCTCCATTGAGATCATAAGACAACTCGATATCTACAAATACGACCCCTGGGATCTTCCAAGGTTTGCAATGACGGGTGAAAAGGAATGGTACTTTTATTGTCCGAGGGACAGGAAGTACAGGAATAGCTCGAGGCCGAACCGAGTGACTGGAGCCGGTTTCTGGAAAGCCACGGGAACGGATAGGCCGATATACTCGTCGGAAGGAAACAAATGCATAGGTCTAAAGAAGTCATTGGTGTTCTACCAAGGAAGAGCTGCGAAAGGAGTTAAG…
	PROTEIN	MGERNDDGDQKMEEVLLPGFRFHPTDEELVSFYLKRKVQHHPLSIEIIRQLDIYKYDPWDLPRFAMTGEKEWYFYCPRDRKYRNSSRPNRVTGAGFWKATGTDRPIYSSEGNKCIGLKKSLVFYQGRAAKGVKTDWMMHEFRLPSLSEPSPCKRFFDSPVSPNDSWAICRIFKKSNTTTLRALSHFVSSLPSDTSVDTMSNQKPSNISHFSSDLKTSSHFQFHHENTNNIPKTSSSTTPLAASISPFSYLDFTSYEKPTNVFNPVSSLDRQYLTNLFLAPQEIQTQFPRLASSNEFPSFLLNMPSSDSSFLGECTGEIDLSAVLAQEQCPALVSLPQEYQEKGHERTGELKNMNEDHHSHCATLRFDDIASAVEEKHPHHYQEVKHNMTLLESYYSSFS…
BniB022603	CDS	ATGGCAGAGGTTAGATGTCGTATCTCAGACGAAGATATCGTAAAGGGATATCTGAGACCAAAGGTGATGGGGGCAGCAACAGCAAACCCGAGATATATAGTAGACAACATGGAGGAGGATTTGTATAAACGAGAGCCATGGCTGCTTCCGCAACCAACAGATCCCATCCTTAACCCAAACGAGTGGTTGTACTTGGGGAAACGGGATTGGAAATATCTCTGGGCAGAAGGAGTTGATTGTGAGGGATCGTGGATGCCCATCGAAGGTCGTCGCCCGATCCTGTCTGAGGATTCAGGTGAATTAATTGGGGGAACCATGAGATTCAGATATGTCTTCAGGAACAAGAACGATAAAGCAGCTCCCATGGACTGGAGCAATTGGTTCATGCGAGAGTATCGT…
	PROTEIN	MAEVRCRISDEDIVKGYLRPKVMGAATANPRYIVDNMEEDLYKREPWLLPQPTDPILNPNEWLYLGKRDWKYLWAEGVDCEGSWMPIEGRRPILSEDSGELIGGTMRFRYVFRNKNDKAAPMDWSNWFMREYRLCDKLAVPSKPVMFSARLLVTFDFFLLVFAFSPF
BniB022067	CDS	ATGACTTTGAAGAGGACTCGAGGGTCGCATTTCAACCCAACAAACTTTGAGCTCCTCAACATCCTTCAGGGAAGAATCGTAAGAAACAAAAGATGTAGTTTCATAACCGACATGCAGAATCTGTACGAGAGAGAACCGTGGCTTCTTCAGCACGTAAGACATGTTAGATTCTATGAGAACGAATGGTTATACTTCGTCAGGAGGAATAAACGTCCAGGGATGAAAAAAGCTGACTCGAAGAGACCGAGCAGAAAGGTTGGCGAGTCAGGTATATGGAAGACTACTGGTACTGTGATTCAGATAAAGAATCAAGATGGAGTTAACCTCGGTTCTATGAGACATATAAGCTTCAAAGCCAATAGCGAAACAGTGAAAGATGGGATAACGACTGGTTGGACG…
	PROTEIN	MTLKRTRGSHFNPTNFELLNILQGRIVRNKRCSFITDMQNLYEREPWLLQHVRHVRFYENEWLYFVRRNKRPGMKKADSKRPSRKVGESGIWKTTGTVIQIKNQDGVNLGSMRHISFKANSETVKDGITTGWTMHEFVLDKPWFQDVVLCRIRFYKRKENAQYAPRFLPIVIGREQGETIHLGVAAAGEELQHVDAPVETHEAEGIEQLTGSCSREVVSYLASQQIIMAQDSNYPILNGGMMQHEDFGSYGQHHNHIIGQMETSGQGSGDMIEDQNQYLGQETTDTRQVPVMMNQALNEWNGYSGSSLAHQYLGKDMAAQGQHFSVNGSMEKHQGFGSYGQLSGELLGQQQGHILGRQATCVSLMEDHQKQSQNLFGGHGTDPSHSAQAMEEAQQQWNG…
BniB004155	CDS	ATGGAGAGTCTCTCACTCATTCCTCCCGGTTACCGATTTCATCCGACCGACGAAGAACTCGTTGACTATTATCTTAAGAAGAAAGTTGCATTCCCAGGAATGCAAGTAGATGTTATCAAAGATGTTGATCTTTACAAAATCGAGCCATGGGACATCCAGGAGTTATGTGGAAGAGGAACAGGAGAAGAGAGGGAATGGTATTTCTTTAGCCACAAGGACAAGAAGTATCCAACAGGGACGCGAACCAATAGAGCAACGAGGTCAGGGTTTTGGAAAGCAACGGGTCGAGACAAGGCCATATACTCGAAGCAAGAGCTTGTCGGGATGAGAAAGACTCTTGTGTTTTACAAAGGCCGGGCCCCAAATGGTCAGAAATCCGATTGGATAATGCATGAATAT…
	PROTEIN	MESLSLIPPGYRFHPTDEELVDYYLKKKVAFPGMQVDVIKDVDLYKIEPWDIQELCGRGTGEEREWYFFSHKDKKYPTGTRTNRATRSGFWKATGRDKAIYSKQELVGMRKTLVFYKGRAPNGQKSDWIMHEYRLETDENGPPHEEGWVVCRAFKKKLTTMTNYNNPRTMMGSSSSSGQESNWFVQQMDVANGIYYHLPDLESPRMFQASSSSLHHNGNDPYGVVLSTINATPTTLMQGDDEVDHSQVITNDDDHTIMMNTNTDHHLHQSGLLLNDDHNDQVMDWQTLDKFVASQLIMSQEDEEVNKDPSDHSSNETFHHLPEEQETMVSMNASPSSPCSFYSWSQNTHT
BniB004248	CDS	ATGAATCTACCACCGGGGTTCAGGTTTTTTCCGACGGACGAAGAGCTCGTCGTCCACTTCCTCCACCGCAAAGCTTCACTCTTGCCTTGTCATCCTGACGTCATCCCCGACCTCGATCTTTACCCTTACGATCCTTGGGACCTTCCCGGGAAAGCTTTGGGAGAAGGGAGGCAATGGTACTTCTATAGTAGAAAGGCGCAAGAAAGAGTGACAGGCAATGGATATTGGGGATCAACGGGAATAGACGAGCCAATCTTCACAAGCTCCACACACAAGAAAGTGGGCATCAAAAAGTACTTAACTTTCTATCTTGAAGATTCTCAAACTAACTGGATCATGCAAGAATATTCCCTCCCAGATTCTTCTTCTTCTTCTTCTTCTAGTCGAACTTCTAAGAGA…
	PROTEIN	MNLPPGFRFFPTDEELVVHFLHRKASLLPCHPDVIPDLDLYPYDPWDLPGKALGEGRQWYFYSRKAQERVTGNGYWGSTGIDEPIFTSSTHKKVGIKKYLTFYLEDSQTNWIMQEYSLPDSSSSSSSSRTSKRSSRGSTSSSHKPDYSKWVICRVYEQNCSEEENDDGTELSCLDEVFLSLDDLDEVSLP
BniB004525	CDS	ATGGTCAAGAATAGCTTGGCACCTGGCTTTAGGTTTCATCCCACTGATGTTGAACTTGTAAGATATTACTTGAAGAGAAAAGTTCTTGGAAAAAAGTTCATGACTGATGCCATAGCTGAGGTCGACATCTACAAGTTCGAACCACCTGATTTACCTGAGAAGTCATGCTTAAGGACAGGAGATCTTAAGTGGTACTTCTTCTGTCCGAGGCTTAAGAAGTATCCCAACGGCGGCAAGGCAAACCGTTCTACTGAATCTGGCTACTGGAAGACCACAGGGAAAGATAGAGATGTTACTTACAATGATGAGGTCGTTGGGAAAATCAGAACTCTGATTTTTCATTACGGGAAGACGCCTCGTGGGGAACGTACTGACTGGGTCATTCACGAATACAGACTT…
	PROTEIN	MVKNSLAPGFRFHPTDVELVRYYLKRKVLGKKFMTDAIAEVDIYKFEPPDLPEKSCLRTGDLKWYFFCPRLKKYPNGGKANRSTESGYWKTTGKDRDVTYNDEVVGKIRTLIFHYGKTPRGERTDWVIHEYRLEDKTLEQRNVPQDTYVICKLFKKNGLGPRHGSEYGAPFKDEDWSDEEDRESLVAITSADNADPGPNEETSLVATASHSQPPEDCFNGVMSESCVSNVPQVTTTVLPPLTSDVVAQPLLTSSPLLEILAPLENDDFYSMMDRFVVDNDESLLLDGFNNQYEVRHEHDELPAVEEAPVGLEDGDLSWIQDMGDEIFIGIEDLIEPSTPPAAQAGHPGDS
BniB004536	CDS	ATGGCCTCACTTACTATCATCTCCCTCGCAATAAACGCCGACAAAGACATCAAAGAAAGAACCTTTCACATAATGAAGGCGGAGCTGAATTTACCGGAGGGATTCCGATTTCACCCGACGGACGAAGAGCTCGTGAAGTTCTATCTTTGTCGGAGATGCGCATCGGAGCCGATCAGCGTTCCGGTGATCGCGGAGATTGACCTCTACAAGTTCAATCCATGGGAACTTCCAGAAATGGCTTTGTACGGAGAGAAAGAATGGTATTTTTTCTCACACCGAGACCGGAAATACCCAAACGGAACAATGGAGAAGTATTATCCGGCGGATGAGGTGACTACGAGTAGTACGTCGGACTCTAAATGCTCAAGTCACGTGATTTCACCTGACGTCACGTGTTCA…
	PROTEIN	MASLTIISLAINADKDIKERTFHIMKAELNLPEGFRFHPTDEELVKFYLCRRCASEPISVPVIAEIDLYKFNPWELPEMALYGEKEWYFFSHRDRKYPNGTMEKYYPADEVTTSSTSDSKCSSHVISPDVTCSDNCESKWVDDLEGDAFMFGSIESLQNDAFYPDFAASFEDPPEQKPFSNWSFGHQG
BniB004855	CDS	ATGGAACCAAAACACAAAGCTTTGCCGATAGGATTCAGGTTTCGTCCAACAGATTGTGAGATTTCGAAATATTTCTTGAGGAGAAAAGCTCTGGAACAACCAATGAGAGCTCCCAACGTACCTGACGAGTGTCATGATATCTTCACAAGACATCCTCGTGACTTGCCTGGCTATCCAAGAGAAACGCATTGGTACTTTTATTGCAGAAAACTTGATAGCCAAGTTATTCCCAACTCTCATAGTATTTGGATACAAATCGGAGAAGAAACTGGTGTGTTGGATCCACAGAATAATGATACATTAGTCGGTATCAAACGTCCATTCACTTGCGTTGATCATGAAGAAGAGCCCGACGATATTCTTTTGTCAGATGAAGACGAACCTCCACAATACAATTGG…
	PROTEIN	MEPKHKALPIGFRFRPTDCEISKYFLRRKALEQPMRAPNVPDECHDIFTRHPRDLPGYPRETHWYFYCRKLDSQVIPNSHSIWIQIGEETGVLDPQNNDTLVGIKRPFTCVDHEEEPDDILLSDEDEPPQYNWFMDEFNLPLTVSDTDWVLCHVFRKNNEPESESEEEEEEEEKETVEAESLDLLIEKDGNVLPPSPSPP
BniB004891	CDS	ATGGCTCATCCAAGAGACTTAAAGTTCTCTCCGATTGACCAGGATTTGGTGGGGTATTATCTACGCAACAGAGTGAAAACAGGAAAAGATGGTTTCATCACAGATATCAAACTTTACGAAGACGAGCCGTGGCTTCTTCCGCACGTCAAGAATGATCAGTTCAAAGAGAACACGTGGTTTTACTATGTTGTTAGGACACGTAATTTGGGAAGCAGGCCCAAACGCATGGTTCCCGGTAGAGGAAGCAGTAACGGCGGAACTTGGACGACAAGTGGCGTAAAGAAAGAGATCACAGACCGTAAGACAAAGGTTGTGATCGGGTACAAAACAGAACTCGCGTACCACAAGAAAGTCAAGGGAAAGACTAAAGGAGACACCACTGGTTGGTGTATGACGGAG…
	PROTEIN	MAHPRDLKFSPIDQDLVGYYLRNRVKTGKDGFITDIKLYEDEPWLLPHVKNDQFKENTWFYYVVRTRNLGSRPKRMVPGRGSSNGGTWTTSGVKKEITDRKTKVVIGYKTELAYHKKVKGKTKGDTTGWCMTEYWLASENDAQFQEVVLCHIRDNNKIVVDQSQESKHGDNDNMFDNEQQQPLIPPCEGHDSRFPVQGHDSRFPLPVKERDWDFKPLGDILIRPLKNNSIHRFLVLLNVKIPKA
BniB004953	CDS	ATGGATTATGATGCATCAAGAATAGTTGAAATATTAGAAGATGAAGAACAGATTGATCTACCACCTGGATTCAGATTTCACCCTACTGATGAAGAACTCATATCTCACTATCTTAAACCAAAGGTCTTCAACACTTTATTCTCTGCCACTGCCATTGGTGAAGTTGATCTCAACAAGATTGAGCCTTGGGACTTACCAAAGAAGGCCAAGATGGGGGAGAAAGAATGGTATTTCTTTTGTGTACGAGACCGGAAATACCCAACCGGTTTAAGGACAAACCGGGCGACTGAAGCCGGTTATTGGAAAGCCACAGGCAAAGACAAAGAGATTTTCAAGGGAAACTCACTCGTGGGTATGAAGAAAACTCTGGTTTTCTACAAAGGAAGAGCTCCTAAAGGG…
	PROTEIN	MDYDASRIVEILEDEEQIDLPPGFRFHPTDEELISHYLKPKVFNTLFSATAIGEVDLNKIEPWDLPKKAKMGEKEWYFFCVRDRKYPTGLRTNRATEAGYWKATGKDKEIFKGNSLVGMKKTLVFYKGRAPKGIKTNWVMHEYRLEGIYSIQNLPQTAKNEWVICRVFQKRADGTKVDMSDLMFLDSNINRTGPTRLPSLMDCSQRDSSLGLSTHVSCFSDQETEDKSLIHHESKDGSGSLFYSDPLFLQDNYSLIKMFINDQETLFPGPDSTGLAAGTGELDCFWNP
BniB006291	CDS	ATGATGTCCGAATCTATGAGCATATCAGTGAACGGACAATCTCAAGTGCCTCCTGGGTTTAGGTTTCACCCGACCGAGGAAGAGCTGCTGCTGTATTATCTCCGGAAGAAAGTCAATAGCATCAAGATCGATCTCGACGTTATTCGCGACGTTGATCTCAACAAGCTCGAGCCTTGGGATATTCAAGAGATGTGTAAAATAGGAACAACGCCTCAAAACGACTGGTATTTCTTTAGCCACAAGGACAAAAAATATCCGACTGGAACCAGAACTAACCGAGCTACGGCGGCCGGATTTTGGAAAGCAACGGGTCGCGACAAGATCATATATAGTAATGGCCGTAGGATCGGGATGAGAAAGACTCTTGTCTTTTACAAAGGTCGTGCTCCTCACGGCCAA…
	PROTEIN	MMSESMSISVNGQSQVPPGFRFHPTEEELLLYYLRKKVNSIKIDLDVIRDVDLNKLEPWDIQEMCKIGTTPQNDWYFFSHKDKKYPTGTRTNRATAAGFWKATGRDKIIYSNGRRIGMRKTLVFYKGRAPHGQKSDWIMHEYRLDDNIISSEDVTVCEVVNIIGEASKDEGWVVCRIFKKKGLHKTLNSPIGGASLSGGGDMARATSSSQMFTDDTLEQFLELMGRSCKEELNLDPFMKLPNLESPNSQTVNNNCHVNSPDTNHDIHVSNVVDTSFVTSWAALDRLVASQLNGPISYSIATVDESHVEQDHLVLPSINRSGSYHAGLIQEYTPEMELWNTTTSSLLSSSD
BniB007256	CDS	ATGAACATATCAGTAAATGGACATTCACAAGTGCCTCCTGGCTTTAGGTTTCACCCGACCGAGGAAGAGCTCTTGCGGTATTACCTCCGCAAAAAAATCTCTAACATCAAGATCGATCTCGATGTTATTCGTGATGTTGATCTCAACAAGCTCGAGCCTTGGGATATTCAAGAGATGTGTAAGATTGGAACAACACCGCAAAACGATTGGTACTTCTTTAGCCACAAGGACAAGAAGTATCCAACTGGAACAAGAACCAACCGAGCCACCACGGTCGGGTTTTGGAAAGCAACCGGACGTGACAAGATCATATATAGCAATGGCGATAGGATCGGTATGCGTAAAACGCTTGTCTTCTACAAAGGTCGTGCCCCTCATGGTCAAAAATCCGACTGGATC…
	PROTEIN	MNISVNGHSQVPPGFRFHPTEEELLRYYLRKKISNIKIDLDVIRDVDLNKLEPWDIQEMCKIGTTPQNDWYFFSHKDKKYPTGTRTNRATTVGFWKATGRDKIIYSNGDRIGMRKTLVFYKGRAPHGQKSDWIMHEYRLDSSSSNHDTDLTVETCEVIGGEDEGWVVCRVFMKKSLCKTVISSTTRSVKTSSSNEETIEQFLEAVGQSCKEEINLDPFLQLPNLECPNNTVASYQRLLDGEVNNCHVSKSVEASLVTSWTALDRLVASQLNGPNYTIPTVDEILQSPCLGLNRPSYYNSGLTPDYYIPEMDISNDTYFGRTTNPLWHVSNCI
BniB010178	CDS	ATGGCTACTAGATATCCGCCTGGTTCACAATTTCTTCCAACGGAGTTGGGGTTGGTGAAGCTTCATCTCAAGGACAAGGTGGAGAAGAACATTGACGGTTTCATCAAAACGTTGAACGTCTACGGAGACGCGCCGTGGCTTCTCCATCACGACACGAACCCTCTCTATCCTAGAAACGAATGGTACTACTTTGTTCCGAGGAGGATAAGAGGTGTCAAGACAGTGAGCCGGATGGTACCAAGAAACGGAGAAAGCTTCTTAGGGGGCACGTGGAAATCGATAGGTAAGAGAAAAGATATAAAGAAAAAGGCCAAGGAGTTGATGGGATACAAGAGGGAACTCGTGTTCAACATGAACGTGGTTGGGGATCAGTCAGAGAAGCAGAAGAAGACTGACTGG…
	PROTEIN	MATRYPPGSQFLPTELGLVKLHLKDKVEKNIDGFIKTLNVYGDAPWLLHHDTNPLYPRNEWYYFVPRRIRGVKTVSRMVPRNGESFLGGTWKSIGKRKDIKKKAKELMGYKRELVFNMNVVGDQSEKQKKTDWHMNEYSLHRNGDEFHDLVLCHVRLLNSAQIFRPPVVPAAHDHVDDNNNDVVLPNQEQEEEAGFAMLEYEGGDVNQHEQQQEEQEDSLIPLPCPFQSNYNQGQYLLEAIAYQNDMMILKNDRGYLNQLQQQQDQEDSLILAHPINNNQEPFPFDDLAYGYELMPIFNEGNQQQHEQQEHSPTLLLPPLQQSNDNLEHYQLEDYAYDGADDDDLTFDPDELLNSLNKWKEQEDSPTDYLLPPLESNVNQEQCLSRDTLFVPSQLENND…
BniB010204	CDS	ATGGCTACTAGATATCCGCCTGGTTCACAATTTCTTCCAACGGAGTTGGGGTTGGTGAAGCTTCATCTCAAGGACAAGGTGGAGAAGAACATTGACGGTTTCATCAAAACGTTGAACGTCTACGGAGACGCGCCGTGGCTTCTCCATCACGACACGAACCCTCTCTATCCTAGAAACGAATGGTACTACTTTGTTCCGAGGAGGATAAGAGGTGTCAAGACAGTGAGCCGGATGGTACCAAGAAACGGAGAAAGCTTCTTAGGGGGCACGTGGAAATCGATAGGTAAGAGAAAAGATATAAAGAAAAAGGCCAAGGAGTTGATGGGATACAAGAGGGAACTCGTGTTCAACATGAACGTGGTTGGGGATCAGTCAGAGAAGCAGAAGAAGACTGACTGG…
	PROTEIN	MATRYPPGSQFLPTELGLVKLHLKDKVEKNIDGFIKTLNVYGDAPWLLHHDTNPLYPRNEWYYFVPRRIRGVKTVSRMVPRNGESFLGGTWKSIGKRKDIKKKAKELMGYKRELVFNMNVVGDQSEKQKKTDWHMNEYSLHRNGDEFHDLVLCHVRLLNSAQIFRPPVVPAAHDHVDDNNNDVVLPNQEQEEEAGFAMLEYEGGDVNQHEQQQEEQEDSLIPLPCPFQSNYNQGQYLLEAIAYQNDMMILKNDRGYLNQLQQQQDQEDSLILAHPINNNQEPFPFDDLAYGYELMPIFNEGNQQQHEQQEHSPTLLLPPLQQSNDNLEHYQLEDYAYDGADDDDLTFDPDELLNSLNKWKEQEDSPTDYLLPPLESNVNQEQCLSRDTLFVPSQLENND…
BniB012373	CDS	ATGAATCAGAATATAAAAGAACTATCTCTGGATTCTCTACCAGTGGGGTTGAGATTCCGTCCAACGGACGAGGAGCTAGTCCGTTACTATCTCCGCAGGAAAATCAACGGTCACGACGACGACGTCAAAGCCATCCGAGAGATCGATATCTGCAAATGCGAACCCTGGGATCTACCTGATTTTTCTGCGATCAAAACGAAAGATTCAGAGTGGCTCTTCTTCTCTCCATTGGACCGGAAGTACCCTAACGGAAGTAGACAGAACCGGTCAACGATCACTGGCCATTGGAAGGCCACAGGAAAAGACCGGATGATCAAATCCGGAAAGAACAACGTTATAGGAGTGAAGAGGACGCTGGTTTTTCACTCTGGTCGTGCTCCCAAGGGAACGCGAACGAAC…
	PROTEIN	MNQNIKELSLDSLPVGLRFRPTDEELVRYYLRRKINGHDDDVKAIREIDICKCEPWDLPDFSAIKTKDSEWLFFSPLDRKYPNGSRQNRSTITGHWKATGKDRMIKSGKNNVIGVKRTLVFHSGRAPKGTRTNWVMHEYRATEQDLSGTNPGQSPFVICKLFKKQDPSLVEKPVSSPTSSPDETKSEEVSMVVKAQEVKPESSLVISGDSHNGAACNEATTSKLGDLDWLSFPELESLTVFSPLHSQVQFELGSSFNAFQSDFSGNHNNNTFQIQTQYGTNEADTDISGFLNSILDFQDDLEDRDFVFPCAVSDQIAPAYQQERSAGDMSDDVSRTGIKLQPRREQPSGCTTDYIIHGNASRRLRLQTIKREVEDTDGKAIKKGKLMRSKNRAGFLFKK…
BniB016220	CDS	ATGGAAAAACAGAACTCCACTAAGACCAGAGAACTGAGATTACCACCAGGGTTCCGATTTCACCCAACAGATGAAGAGCTAGTGGTTCATTATTTAAGTCGAAAAGTGACTGGTTCACCATTACCAGGTTATGTTATACCGGAAATCGATATATGTAAAGCCGAACCATGGGATTTACCAGGTGATTGTGATTCAGAGAGGTATTTTTTTAGTACGAGGGAAGCTAAATACCCAAATGGAAACCGGTCGAACCGATCAACCGGTTCGGGTTACTGGAAAGCGACCGGAGTTGATAAGCAAATCGGGAAGAAGGTTCTTGGGATGAAGAAAACTCTGGTTTTCTATCAAGGGAAACCTCCGAACGGGACAAGAACCAATTGGGTTCTTCATGAGTATCGT…
	PROTEIN	MEKQNSTKTRELRLPPGFRFHPTDEELVVHYLSRKVTGSPLPGYVIPEIDICKAEPWDLPGDCDSERYFFSTREAKYPNGNRSNRSTGSGYWKATGVDKQIGKKVLGMKKTLVFYQGKPPNGTRTNWVLHEYRLAVSQHESYAEDRNWVLCRVFLKKRSDKNSKRKEDEREKTKKKEETESDDSKSTCPVFYDFLRNDVKKRRCSDLNLTRTFSCCPSSSASSSVCSSALTQTSLNSHHEEISCRENKFRLFL
BniB019396	CDS	ATGGCGTACCAGAAAGATTTAGACCCCAATCCTCCTCTCGAAGATCGAACGGTTCGTCCATTAAAGAGGATAGCAGAAGCACACGAGTCGGAGTCTGAGCCCGAGTTCAAGAAACAGAAACTCGAAGAGCTCCAGAGAAAAGCTTATCACTCTGTTCTCCATGCTTCCAAAGCAGAAACCTCGCTAATATCACACGAAAAGATTGTAACTTCGAGTCTAACCTCTGTTCAAGAGTCTCTTCTTGGAAAACGTATCCGCTCAAGATTTACTGATGAAGATGATCTCCCAAGTAGCAAGAAACAGGCTTTCGAAGATGTTCTCCGCGCCTTTAACGCAGAGTCTCCAACACTATCCAGCTCAAGGGCTTTGATAATTTTTGACGAATGCAACAGCACCCAC…
	PROTEIN	MAYQKDLDPNPPLEDRTVRPLKRIAEAHESESEPEFKKQKLEELQRKAYHSVLHASKAETSLISHEKIVTSSLTSVQESLLGKRIRSRFTDEDDLPSSKKQAFEDVLRAFNAESPTLSSSRALIIFDECNSTHKAHISAKIYDKVKTDPSLVEPFIKTFNTIKKFYPDGCRFRPSDDMMANYYLKNKVLGQPMQARIIPGECHHIFSIPPRDLPGYPRETEWHCYCRKPNGQESRNLWTRVGEDTTVFDPQGNSVGIKRTFALTDQEEESDDIFLPGEIEPPREEWFIEEISLPSSVADTDLVLCHVILNKIEKEEEYEEEEEDDDDDEEEEEDC
BniB019533	CDS	ATGGAACAACCCCCAGCTCCTGCTAACGTCGTCGACTCATCATTCCAACGTCACCGGAACTTGAATCTCCCTCCATGTTACGGATTTCACGCCTCCGACGAACAGTTGTTGGAACTGTTCCTCCGTCCTTTCGTAGAAAGTAAGGAACCGAAGACTTGCCCTATCCATAACATCAGCGACGTATACTCCTCGACTCCAGAGGCTCTCACCGGTAAGTCCTTTCTTGACGAGAAACCTTCATTTCTTGATGAGAAACCTTCCTTTCTTTTGGGCTTTCTTGATGATGAACCAACATCTGTCATTGTTTGTCAAGGCGCATATGAACAGGGGGGAAACGATCAGTGGTTCTTCTTTGCTACCAAGAAGTACCATGACGTTACTTCAAGGGACGTTCGTGTT…
	PROTEIN	MEQPPAPANVVDSSFQRHRNLNLPPCYGFHASDEQLLELFLRPFVESKEPKTCPIHNISDVYSSTPEALTGKSFLDEKPSFLDEKPSFLLGFLDDEPTSVIVCQGAYEQGGNDQWFFFATKKYHDVTSRDVRVTTDGGGHWIRKGAIKKFFDQNNTLLGFKRTQDFYAQGMDLAYWRMEELSLRTELCIELYR
BniB022760	CDS	ATGAAAATATCAGTAAATGGACAGTCACAAGTGCCTCCTGGCTTTAGGTTTCACCCGACTGAGGAGGAGCTCTTGGAGTATTACCTCCGCAAGAAAATCTCTAAAGCCAAGATTGATCTCGATGTTATTCGTGATGTTGATCTCAACAAGCTCGAGCCTTGGGATATTCAAGAGATGTGTAAGATTGGAACAACGCCGCAGACTGATTGGTACTTCTTTAGCCACAAGGACAAGAAGTATCCCACGGGAACAAGAACCAACCGAGCCACCACGGTGGGGTTTTGGAAAGCAACCGGACGTGACAAGATCATATATAGCAATGGTCATAGGATCGGTATGCGGAAAACGCTTGTCTTCTACACAGGTCGAGCCCCTCATGGTCAAAAATCGAATTGGATC…
	PROTEIN	MKISVNGQSQVPPGFRFHPTEEELLEYYLRKKISKAKIDLDVIRDVDLNKLEPWDIQEMCKIGTTPQTDWYFFSHKDKKYPTGTRTNRATTVGFWKATGRDKIIYSNGHRIGMRKTLVFYTGRAPHGQKSNWIMHEYRLDENVLASSNHDDDVSVETSEVIGGDEGWVVCRVFLKKSLCKTVIMSSPPRSVKPSPETIEELFEVMGQSCKEEIIVDPFLKLPNLECPNNAVASCQRLMDDQVHNYHVPSFGTSWSTLDRLVASQLNGSNYEIPQSPLNGLNRPGFYNTGLTQDYYIAEMDIWNNTDFGRTTTSSSNPWCHVSNSSE
BniB022848	CDS	ATGGAGATAGGATCGTCGTCCACGGTGGCCGGAGGAGGACAGCTCTCAGTGCCTCCAGGGTTTCGGTTTCATCCAACAGAGGAGGAGCTTCTATATTATTATCTCAAGAAGAAGGTTTCTTATGAACCAATTGATTTAGATGTTATTAGAGAAGTTGATCTCAACAAACTTGAACCTTGGGAACTTAAAGAGAAATGCAGGATCGGGTCGGGTCCTCAAAACGAGTGGTACTTCTTTAGCCACAAGGACAAGAAGTATCCGACTGGGACCCGAACGAACCGGGCCACTGCAGCCGGGTTCTGGAAGGCTACTGGTAGAGACAAGTCTATACATTTAAATAGCTCCAAGAAGATTGGACTTCGTAAGACACTTGTCTTCTATACTGGTCGTGCTCCTCAT…
	PROTEIN	MEIGSSSTVAGGGQLSVPPGFRFHPTEEELLYYYLKKKVSYEPIDLDVIREVDLNKLEPWELKEKCRIGSGPQNEWYFFSHKDKKYPTGTRTNRATAAGFWKATGRDKSIHLNSSKKIGLRKTLVFYTGRAPHGHKTEWIMHEYRLDDNENEIQEDGWVVCRVFKKKNHFRGFHQEQDQDHQYISTNNDHDHHHHQHHTESNSNNHSSLIPHSLDHHHHMGRQIHMPLHEFANTLSHGSMHLPHLFSPDSAQPFVSSINTTDIECSQNLLRLTSNNNYGGDWSFLDKLLTTNNMNHQQQQQQQVQNHHAKCFGDSSSNDQAVVTHDNGGSSSSPDNQRFPFHYLGNNASLLRFPK
BniB028052	CDS	ATGGATGATGAAGAGAGCAGCAACGTAGAAAGATTCGATGACGTCGTTTTACCAGGGTTTAGGTTTCATCCCACAGATGAAGAACTCGTAAATTTCTACCTGAAACGAAAGGTTCTACACAGATCTCTTCCCTTTGAACTCATCAAGAAAGTCGACATATACAAATACGATCCATGGGACCTCCCAAAGCTTGCGGCCATGGGGGAGAAAGAGTGGTACTTTTACTGTCCAAGAGACAGGAAATATCGGAACAGCACGAGGCCTAACCGAGTAACTGGAGGTGGATTCTGGAAAGCAACCGGAACTGACCGACCTATATACTCATTGGACTCGACACGATGCATCGGTCTGAAGAAGTCGCTTGTGTTCTACCGTGGTCGAGCTGCTAAAGGAATCAAA…
	PROTEIN	MDDEESSNVERFDDVVLPGFRFHPTDEELVNFYLKRKVLHRSLPFELIKKVDIYKYDPWDLPKLAAMGEKEWYFYCPRDRKYRNSTRPNRVTGGGFWKATGTDRPIYSLDSTRCIGLKKSLVFYRGRAAKGIKTDWMMHEFRLPSLSDSHHSSSYPSYNNKKQHHNINNKEIPSNDAWAICRIFKKTNSVSSQRSVPQSWLNPAIPDTSQYNSLSQTTTLFASTDVFSNLATRQNLISSPVDEPASFTESAAAYFASQMLGVPYNIARNNGTGGAMFLRNSETGSALFPTNNEDNYFHNLAGGLTHELPNVRSMVETGFETTASEMSATSYSPNN
BniB040195	CDS	ATGGAGATAGGCTCGTCGTCCACGGTGGCCGGAGGAGGACAGCTCTCGGTGCCTCCAGGTTTTCGGTTTCATCCAACCGAGGAGGAGCTTCTATATTATTACCTCAAGAAGAAGGTTTCTTATGAACCAATTGACCTAGATGTTATTAGAGAAGTTGATCTCAACAAGCTTGAACCTTGGGACCTTAAAGAGAAATGCAGAATCGGGTCGGGTCCTCAAAATGAGTGGTACTTCTTTAGCCACAAGGACAAGAAATATCCTACTGGGACCCGAACGAACCGGGCCACTGCAGCCGGGTTCTGGAAGGCTACTGGTAGAGACAAGTCCATACATCTAAACAGCTCCAAAAAGATTGGACTTCGTAAGACTCTTGTCTTCTACACTGGTCGTGCTCCTCAT…
	PROTEIN	MEIGSSSTVAGGGQLSVPPGFRFHPTEEELLYYYLKKKVSYEPIDLDVIREVDLNKLEPWDLKEKCRIGSGPQNEWYFFSHKDKKYPTGTRTNRATAAGFWKATGRDKSIHLNSSKKIGLRKTLVFYTGRAPHGQKTEWIMHEYRLDDNENEIQEDGWVVCRVFKKKNHFRGFHQEQDQDHHHNQYISTNNDHDHHHHHHQTESNSNNHSSLIPPSLDHHHHMGRQIHMPLHEFSNTLSHGSMHLPQLFSPDSAAAAAAAAQPFVLSINTTDIECSQNLLRLTSNNNNYGGDWSFLDKLLTTTNMNQQQQVQNHQAKCFGDSSNNGNNDQAVTHDHLGNNNGNERFPFHYLGNDANLLKFPK
BniB041900	CDS	ATGATGTCGGAATCTATGAGCATATCAGTAAACGGACAATCTCAAGTGCCTCCTGGGTTTAGGTTTCACCCGACCGAGGAAGAGCTGCTGCAGTATTATCTCCGGAAAAAAGTAAATAGCATCAAGATCGACCTCGACGTTATTCGCGACGTTGATCTCAACAAGCTCGAGCCTTGGGATATTCAAGAGATGTGTAAAATAGGAACAACGCCTCAAAACGACTGGTATTTCTTTAGCCACAAGGACAAAAAATATCCGACGGGGACGAGAACTAACCGAGCTACGACGGTCGGATTCTGGAAAGCAACGGGCCGCGACAAGATCATATATAGTAATGGCCGTAGGATAGGAATGAGAAAGACTCTTGTTTTCTACAAAGGTCGAGCTCCTCATGGCCAG…
	PROTEIN	MMSESMSISVNGQSQVPPGFRFHPTEEELLQYYLRKKVNSIKIDLDVIRDVDLNKLEPWDIQEMCKIGTTPQNDWYFFSHKDKKYPTGTRTNRATTVGFWKATGRDKIIYSNGRRIGMRKTLVFYKGRAPHGQKSDWIMHEYRLEDVISPEDVTVHEVVTIIGEASQDEGWVVCRIFKKKNLHKTLNSPIGGASLSGSGDTARTSPSSQFFNDESLEQFLEFMGRSCKEELSLDPFMKLPNLESPNSQTFYNNCHVSSPDTNHAVQVSNVIDTSFVSSWSALDRLVASQLNGPSIADVDESHADQDHLALPSLRSPYRSLNRSGSYHDGLSQEHPAEMELWNTTTSSLSSPSDPFCHVSNGSG
BniB046995	CDS	ATGAAGGCGGAGCTAAATTTACCGGCGGGATTCCGATTTCACCCGACGGACGAAGAGCTAGTTAAGTTCTATCTCTGCCGGAGATGCGCGTCGGAGCCGATCAGCGTTCCGGTGATCGCGGAGATCGATCTTTACAAGTTCAATCCATGGGAGCTTCCAGACATGGCTTTGTACGGAGAGAAAGAATGGTACTTCTTCTCACATCGAGACCGGAAATACCCAAACGGTTCGCGTCCGAACCGGGCAGCAGGAACCGGTTATTGGAAAGCGACGGGAGCTGATAAACCGATCGGTAAACCGAAGACGTTGGGGATTAAGAAAGCGCTCGTTTTCTACGCGGGGAAAGCTCCGAGAGGTGTGAAGACGAATTGGATCATGCACGAGTATCGTCTCGCCAAT…
	PROTEIN	MKAELNLPAGFRFHPTDEELVKFYLCRRCASEPISVPVIAEIDLYKFNPWELPDMALYGEKEWYFFSHRDRKYPNGSRPNRAAGTGYWKATGADKPIGKPKTLGIKKALVFYAGKAPRGVKTNWIMHEYRLANVDRSASSNNKNNLRLDDWVLCRIYNKKGTMEKYYPAGEKETAMMMTNTTTTTTSDSKCSSHVISPDVTCSSEVQSESKWVDDLEEAFDASMFGSLLQNDAFVPQFPYQSDFAAMFDDPPEQKPFLNWSFAPQG
BniB047040	CDS	ATGAATCTACCACCGGGGTTCAGATTTTTTCCGACGGACGAAGAGCTCGTCGTCCACTTCCTCCAACGCAAAGCTTCACTCTTGCCTTGTCATCCTGACGTCATTCCTGACCTCGATCTTTACCCTTACGATCCTTGGGCCCTTCCCGGGAAAGCATTGCAAGAAGGGAGGCAATGGTACTTCTATAGTAGAAAGACACAAGAAAGAGTGACAAGCAATGGGTATTGGGGATCAATGGGAATAGACGAGCCAATCTTCACAAGCTCCACACACAAGAAAGTGGGCATCAAAAAGTATCTAACGTTCTATCTCGGAAATTCTCAGACAAACTGGATCATGCAAGAATATTCTCTCCCAGATTCCTCGTCTTCATCTAGTCGGTCTTCTAAGAGATCAAAC…
	PROTEIN	MNLPPGFRFFPTDEELVVHFLQRKASLLPCHPDVIPDLDLYPYDPWALPGKALQEGRQWYFYSRKTQERVTSNGYWGSMGIDEPIFTSSTHKKVGIKKYLTFYLGNSQTNWIMQEYSLPDSSSSSSRSSKRSNRGSTSSSHKPDYSKWVICRVYEQNCSDEEDDDGAELSCLDEVFLSLDDLDEVSLP
BniB048512	CDS	ATGTCTAAAGAAGCTGAGATGTCCATCGCTGTATCGGCCTTGTTCCCTGGGTTCAGATTCTCTCCAACCGATGTTGAACTCATATCGTATTACCTCCGTCGTAAAATTGAAGGTGACGAAAACTCTGTCGCAGTGATCGCCGAGGTCGAGATTTACAAGTTCGAGCCGTGGGACTTACCAGGAGAGTCCAAGTTGAAATCGGAGAACGAGTGGTTTTACTTCTGTGCAAGGGGAAGAAAATATCCACACGGGTCACAGAGCCGGCGAGCAACAGAGCTAGGATATTGGAAAGCTACTGGTAAAGAGCGAAGCGTGAAATCTGGGAACCAAATCGTTGGAACCAAGAGAACACTTGTCTTTCACATCGGTCGGGCTCCTCGGGGTGAAAGAACAGAGTGG…
	PROTEIN	MSKEAEMSIAVSALFPGFRFSPTDVELISYYLRRKIEGDENSVAVIAEVEIYKFEPWDLPGESKLKSENEWFYFCARGRKYPHGSQSRRATELGYWKATGKERSVKSGNQIVGTKRTLVFHIGRAPRGERTEWIMHEYCIHGASQDALVVCRLRKNADFRASSSQRQMEDGLVQDDDYVGQTGGGGSEREKKSYLVDEPDLQISNGDIAESSNVVEYPDDTNDDCYAEILNDDIIELDEGAVKANQALRPNYPTQQQTIFTEASSSKQMSECGTKKESKQTMNSYALFRITNGSTTASSSCWKIPNPLTHIKKDDSQRVTKKVLATTVFLTILMSVLFTVLTARNRD
BniB048538	CDS	ATGCTACGAATTCATAGAAATGTGGACGAGGCGGTAGAGAAGCTTAAAGCTCAGGAAATTGATGCATTTGGAATCATTTGTCATGTCTCTGATGCTCAACATCGCCAGAGTCTTGTTCAAAAGACAATTCAAGCACTTGCTGCCGAGATGGGACCGGACACAAGAGTGAACGCAGTACCTCCTGGTGTTGTGCCAACACACTTTGCCTCTTTCATCACCCGTAACTCTGAAGTGAGTCGGTTGGGGTTTCTTCTATGGTCGATCTTCACTAGCTCGATCAAGAAGAAACCAGCAAAATATAAACACTTGAAGATTTTATCAAAGATGATGGGGCCGGTGGATGAGTCGTCTATACCGCCTGGTTTTAGGTTTCATCCGACAGATGAAGAGCTTGTTGGA…
	PROTEIN	MLRIHRNVDEAVEKLKAQEIDAFGIICHVSDAQHRQSLVQKTIQALAAEMGPDTRVNAVPPGVVPTHFASFITRNSEVSRLGFLLWSIFTSSIKKKPAKYKHLKILSKMMGPVDESSIPPGFRFHPTDEELVGYYLKKKVASQSIDLDVIREIDLYKIEPWDLQERCRIGYEEQKEWYFFCHKDKKYPTGTRTNRATMAGFWKATGRDKAVYLNSKLIGMRKTLVFYRGRAPNGQKSDWIIHEYYSLESHQNAPAQEEGWVVCRAFKKRTTVPTKRRQLWDPNCFLYDDATLLEPLDKNVLIKRAKHNTDDLAVTPFKQERPFEANQIIDDGFFGSMYLKSIGDDELSQLPQLESPSLASDKLPETSRTGEDDAGAEKRITDWRALDKFVASQFLMSGEE
BniB024014	CDS	ATGGAGGCGGAGGCGGAGGCGGAGGCGATGGGAGGTTGCAAGGATACGGCGGCGTCAGTGGAAGCTGCGACGGTGTTTCCGGGGTTCAAGTTCTCGCCGACGGACGTGGAGCTGATCTCGTATTATCTGAAGCGGAAGATGGACGGTTTGGAGCGGTCCGTTGAGGTTATACCGGAAACTGATATTTACAACTTTGAGCCTTGGGATTTGCCCGATAAGTCGATAGTTAAATCTGATACGGAATGGTTCTTCTTCTGCGCCCGTGGCAAAAAGTATCCACATGGGTCACAAAACAGGAGAGCGACCAAGATGGGGTACTGGAAAGCCACTGGGAAAGAACGCGATGTGAAGTCTTCTTCTCAAGTCATTGGAACAAAGAGGACGCTTGTCTTCCATATG…
	PROTEIN	MEAEAEAEAMGGCKDTAASVEAATVFPGFKFSPTDVELISYYLKRKMDGLERSVEVIPETDIYNFEPWDLPDKSIVKSDTEWFFFCARGKKYPHGSQNRRATKMGYWKATGKERDVKSSSQVIGTKRTLVFHMGRAPKGERTEWLMHEYCMKEVSTDDALVVCRLRRNKEFHSSTSHKEPEPDLPAEKHKIMQNGGGASSRSPDDWDSMIDFYLAGESGEELLNEMAETAENLQVQTEEDFFADILRDEIINVDEAVTTGNIANEVPTLESASKAIRVLPLPSVIDKQMASLLEERPSQQKEGKGSSGTDQVSSCFMGIYSIKTVNRARWDVIICLVALIVMFFYLE
BniB040605	CDS	ATGTATGAATACAACAACATGTATGAATACAACGATGAAGATGGAGGGATTCAGTTTCAACCCTACGACGACCAACTCATCAATTTTTATTTAATCCCCAAGCTGCAAGGTAAACCGTGTAGAGAGATCACTACGAAGGATGTTTATTCAAAGGAGCCATGGTTGCTGGATCATCCCATGGGTTCGTTTTTCAAGAAGAACGAGTGGTACTACTTTGTGACGAGGACTCAACTTTCTAAGAAGAAAATTGGTTGTGGTAAGAAAGCGAAACGGATGATCACCCGAGACGACGATAGTGGGTCCTGGAAAGCTAATGCGAAAGACGAGATCAGGGACAAGGAAACAAATATGGTCATTGGTGAAAAGAAAACCCTAGCTTTTGTTACAAGTAACGTAAAT…
	PROTEIN	MYEYNNMYEYNDEDGGIQFQPYDDQLINFYLIPKLQGKPCREITTKDVYSKEPWLLDHPMGSFFKKNEWYYFVTRTQLSKKKIGCGKKAKRMITRDDDSGSWKANAKDEIRDKETNMVIGEKKTLAFVTSNVNNKKKQKMGDGTSCDVSRDSESWIMTEYMLPKEKDKFHELVICKIHVIKNSKKKKDDHNEACTSSNHHHHVSVLASSFSDQQLQYPINEAHLHEASTSHHHHQHHIESSTSDR
BniB007493	CDS	ATGATGATCAACAACCGCAAATCCTGGCCTAAACACTTTCTTCGAGACGAAAAAGCAAACGTGTATAACCTGAACCCATGGAGTCGCTTCAATACTCCGAACCCTATCGACTTCATCTTCGTCAAACGCAGAACAGATTCTTGCGGTAAGACCGATGGAAGTGTCTCTGGTTGCTGGAGGATCATGGCCCGTGATAAACTGATTAAGTCCGGGGAGACCGGAAGGATTCTAGGGTTCAAGAAGATTCTCAAGTTCTGTGAAAAGGACAAGAAACTATCAGGAGAAGATGAAGAAGAGCAGATAAGCTGGGTCATGGAAGAGTATAGGCTCGTCGCTAAATGGAAGCAAGATCAAGTGATTTGCAAAATTAGGGTTTTGCTACAAGATGAGGTTACTTCC…
	PROTEIN	MMINNRKSWPKHFLRDEKANVYNLNPWSRFNTPNPIDFIFVKRRTDSCGKTDGSVSGCWRIMARDKLIKSGETGRILGFKKILKFCEKDKKLSGEDEEEQISWVMEEYRLVAKWKQDQVICKIRVLLQDEVTSLLAKHISFLSKWIMPLSRRSFMPRWDLRGPKIPTDEIISYYLKMCVDVRNDWPSHFLQSEPVCGVVPWMIVDADQSSVELQEGPYFFVNRTEGSARTDGCDGGCWRIMRRDRVIISKRNKVLGFKRLFKFCVKEKSEPVYKFWAAEK
BniB039034	CDS	ATGGAGAAGAATCTTGTTGGATATAGGTTTAGTCCTACGGGAGAGGAACTGATCAACCATTACCTCAAGAACAAGGTTCTTGATAAACCATGGCTGGTCAACGAAGCCATTAACGAGATCAACATCTGTGCTTACGATCCAAAGTTCTTGCCTTCGTTATCGAAGCTGGAATCAAAGGATCTTGTATGGTACTTCTTCAATCCCAGGGAGTACCACGTATCTGAGAAGAAGAAGGGAACGAAGAGGACAACACCTTCTGGTTTCTGGAAAGCTACTGGTGTTGATCGGAAAATCAAGGATAAGAGAGGACACGGTGATGAGATTGGGATCAAGAAGACGCTTGTATACCATGAAGGTAAAGCTGCTAATGGAGTTAAGACTCCTTGGGTCATTCACGAG…
	PROTEIN	MEKNLVGYRFSPTGEELINHYLKNKVLDKPWLVNEAINEINICAYDPKFLPSLSKLESKDLVWYFFNPREYHVSEKKKGTKRTTPSGFWKATGVDRKIKDKRGHGDEIGIKKTLVYHEGKAANGVKTPWVIHEYHITSMPPTQRNYVICKVMYKGADGDSLFGNNSNDLSHFTMVSDLNTIREINTDPQVEQPRQDLGMSVDDLENPLNEQDDPTLFNADTFFDDNHCPYQQPQVPWDDDYISAMLSFNGGNHAAVLGDIDITMQEHRNDHRPKKALPGIIVDCSSDSDAKSISATSILNVVVKLLDPRAYHL
BniB039035	CDS	ATGGAGAAGAATCTTGTTGGATATAGGTTTAGTCCTACGGGAGAGGAACTGATCAACCATTACCTCAAGAACAAGATTCTTGATAAACCATGGCTCGTAGACGATGCCATTGGCGAGATCAACATCTATGCTTACCATCCAGAGTTCTTGCCTTCGCTATCGAAGATCCAATCAAACGATCTTGTATGGTACTTCTTCTGTCGAAGGGAGTGCCACGCAACTGATAAGAAGAAGGGAACGAAGAGGACAACACCTTCTGGGTTCTGGAAAGCTACTGGCGTTGATCGGAAAATCAAGGATAAGGGAGGGAATGGTGTTGAGATCGGGATCAAGAAGACGCTTGTGTACCATCATGGTAAAGCTGCTAATGGAGTTAAGACTCCTTGGGTCATTCACGAG…
	PROTEIN	MEKNLVGYRFSPTGEELINHYLKNKILDKPWLVDDAIGEINIYAYHPEFLPSLSKIQSNDLVWYFFCRRECHATDKKKGTKRTTPSGFWKATGVDRKIKDKGGNGVEIGIKKTLVYHHGKAANGVKTPWVIHEYHITSLPLNQRNYVICQVKYKGEDRSRLYGNNSDDLSHSTMASDLNTVREINTAPEVEQQRDKDLYMSVDDLANPLNEQDDVLFNPHTFFNDNYYPYQQPQAPCDDDDLSELLSYNGGNHADVLGDLDTILQEHRNDHRPKKALTGIIVDCSSDSDAESISATSYQGTSSPDSFHSLSGHFHTSGVEIPSLRKDSFTDLQSPAETSINRKIRKSHLTRRTVKEGKSKVINASMEKKSSSSLSTMKTEKMGWFITEEAMDRRNRKNP…
BniB039037	CDS	ATGGAGGCGAGTAAAGTGGGGTTTAGGTTTTGTCCAACAGACGAGGAGCTGATAAATTATTTTCTCAAGAACAAGATTCAAGGTAAACCATGGTTAGTTGACGATACGATTAGAGAGGTTAGCATATGTAGTTACGAACCAGCGTCTTTGCCTGCTTTATCGATGATCAAATCTAAGGATCCTATATGGTACTTCTTATCTCCAAAGGAGTACACATCTCCGAAGAAGAGCCTAACGAAGAGGACTACACCTTCGGGGTTCTGGAAATCTACCGGTAAGGATCGGAAAGTTAAGGAGGAAAAAAGAAGAAATGGTGTTGTGATCGGTGTTAAAAAGACTCTTGTGTACCACGAAGGTAAATCATCTAATGCTGTTCCAACTCCTTGGATTATGCACGAG…
	PROTEIN	MEASKVGFRFCPTDEELINYFLKNKIQGKPWLVDDTIREVSICSYEPASLPALSMIKSKDPIWYFLSPKEYTSPKKSLTKRTTPSGFWKSTGKDRKVKEEKRRNGVVIGVKKTLVYHEGKSSNAVPTPWIMHEYHITCLPLPDQSTYVICKIFYKGNAGDIPSGSNSSEPSYLVINDLNTVGATNTRPQVEQVCQESLSGFSANDVTMLMNEQENLCFWDALCPIPDTLFTDNNDNTNVQLQAPCLAQGDDEDLGAFTHIESLFTDHPEFITQENSEEYMINCLAYYSREIVLCGL
BniB039039	CDS	ATGGAAACAAATATAGTTGGGTTTAGATTTTGTCCAACGGACGAGGAGCTGATAAACTATTTTCTCAAGAACAAGATTCAAGGTAAACCATGTTCGATTAGAGAGGTCAACATCTGCAGTTACGAACCAGCTTCTTTGCCTGCTTTATCGATGATCAAATCGAAGGATCATGTATGGTACTTCTTATCTCCAAAGGAGTACACGTCCACGAAGAAGAACGTAATGAAGAGAACTACACCTTCTGGGTTCTGGAAATCTACCGGCAACGATCGGAATGTAAGGAAGGACAAAAGAAGAAACGGTGTTGTGATCGGTACTAAAAAGACGCTTGTGTACCATGAAGGTAAGTCTTCTAGTGCAGTTAGGAGTCCTTGGACTATGCACGAGTACAACATCACT…
	PROTEIN	METNIVGFRFCPTDEELINYFLKNKIQGKPCSIREVNICSYEPASLPALSMIKSKDHVWYFLSPKEYTSTKKNVMKRTTPSGFWKSTGNDRNVRKDKRRNGVVIGTKKTLVYHEGKSSSAVRSPWTMHEYNITCLPLVDQGNAGDIPSSINSSEPSHSLVIDDSNIVGAANTPPLGDQAGEESLYGFSVNDVTMITEKQEHLCPWDALCSIPNTLSIDNNDNPNGQLQAPCLAQDDDGFLGGLTHVNRKHVEFLFIYDQELTTEENSREL
BniB039040	CDS	ATGGAGACAAGTAAAGTGGGGTTTAGGTTTTGTCCAACGGACGTGGAGCTGATAAAGTATTATCTCAAGAACAAGATTCAGGGTAAATCATGGTTAGTCGACGATACGATTAGAGAGGTTAAGATCTGTAGTTACAAACCAGCCTCTTTGCCTGCGTTATCGATGATCAAATCTAAGGATCTTGTATGGTACTTCATCTCTCCAAAGGAGTACACGTCCCCGAAGAAGAATGTAAGGAAGAGGACTACACCTTCTGGGTTCTGGAAAGCTACTGGCAAGGATCGGAATGTGAAGGAGGACAAGCGAAGAAACAGTGTTGTGATCGGTATTAAAAAGACGCTTGTGTACTATGAACATAAATCTTCTAATGCAGTTCGCACTCCTTGGACTATGCACGAG…
	PROTEIN	METSKVGFRFCPTDVELIKYYLKNKIQGKSWLVDDTIREVKICSYKPASLPALSMIKSKDLVWYFISPKEYTSPKKNVRKRTTPSGFWKATGKDRNVKEDKRRNSVVIGIKKTLVYYEHKSSNAVRTPWTMHEYHITCLPLLDGRTYVICKIFYKGNVEDIQSGSIVGAANTPPLVEQTGEENISGFSVTMLMNKKEDICPWDVLYPIPNMQLQAPFLVQDDDDFLGALTHVNRKHVDFLFTDDQELIVTQENCEEYMLKWLC
BniB006326	CDS	ATGGCTCCTGTTTCAATGCCTCCTGGTTTCCGGTTTCATCCAACAGACGAAGAGCTTGTCATATACTACCTCAAACGAAAGATTAATGGCCGGACGATCCAATTAGAGATAATTCCCGAGATTGATCTTTATAAATGCGAGCCCTGGGATTTACCCGGGAAGTCCTTGCTCCCAAGTAAAGACCTAGAATGGTTTTTCTTCAGTCCTCGAGACCGGAAATATCCCAATGGCTCGAGAACTAACCGGGCGACAAAAGCAGGTTACTGGAAAGCCACAGGAAAAGATCGTAAAGTTACTTCCCATTCGCGGACTGTCGGGACAAAGAAAACGCTAGTTTATTATCGAGGAAGAGCGCCTCACGGCTCTCGTACCGATTGGGTCATGCATGAGTACCGTCTT…
	PROTEIN	MAPVSMPPGFRFHPTDEELVIYYLKRKINGRTIQLEIIPEIDLYKCEPWDLPGKSLLPSKDLEWFFFSPRDRKYPNGSRTNRATKAGYWKATGKDRKVTSHSRTVGTKKTLVYYRGRAPHGSRTDWVMHEYRLEEQECDSKSGIQDAYALCRVFKKSALANKLEEQHHVMKRKKATTNSEQSTSSTCLYSDGMYENLENSGYPVSPDHGLTQLGNISSSDMETIENKWSHFMSHDTSFNFPAQSQFCSQYGTITYPPSKAEIAFECARLKNRMLPPVPPLHVEDLAYSEHLGTNVANDTDQMLSKIIALAQASHEPHNSLGSWEFASASGNFQGNVCYPGEKASGSGVEANMKAVDMQVHDGRFKEERIVENLRWVGISSKELEKSFVEEHSTVVPVED…
BniB007771	CDS	ATGGACATTCCGTATTACCACTATGACCACGGAGGAGACAACCAATTTCTTCCTCCGGGTTTCAGGTTTCATCCGACAGATGAAGAGCTCGTCACTCACTACCTCCTCCGTAAGGTCCTCGACGGCTGCTTCTCAAGCCTTGCCATCACAGAGGTTGATCTCAACAAGTGCGAGCCTTGGCAACTTCCCGGGAAAGCTAAGATGGGAGAGAAAGAATGGTACTTTTTTAGCCTCCGTGACCGGAAATATCCGACGGGACTGAGAACGAACAGAGCAACGGAGGCTGGTTACTGGAAAGCTACCGGAAAAGATAGAGAGATTTATAGTTCAAAGACTTCTGCACTTGTTGGGATGAAAAAGACTCTTGTATTCTACAAAGGACGAGCTCCTAAAGGAGAG…
	PROTEIN	MDIPYYHYDHGGDNQFLPPGFRFHPTDEELVTHYLLRKVLDGCFSSLAITEVDLNKCEPWQLPGKAKMGEKEWYFFSLRDRKYPTGLRTNRATEAGYWKATGKDREIYSSKTSALVGMKKTLVFYKGRAPKGEKSSWVMHEYRLEGKFSYHFISRSSKDEWVISRVFKKTGLANTGASAGASISVGSGPGTSKKTKIPSNISTTCRDQPSSSSSVSLPPLLDPTTTLSYTDSSWSYDSRSTNTTVTTTAITEHVSCFSTATTTTALGLDVNVDSFNHLLPPASPGFDPFPRFVSRNVSPLSNFRSFQENFNHFPYFGSSSASTITTSVNLPSSHGGTGMNYWLQTTAEENDTKAGLLNGGLDCVWNY
BniB008382	CDS	ATGCAATTGGGGAGTTCATGTTTACCTCCAGGATTTAGATTCCATCCAACAGATCAAGAGCTCATAGGCTATTACTTAACTAGAAAAACAGAAGGTCTCGAGATCGAGCTTGAAGTCATTCCTGCTATTGATTTATACAAATTTGATCCTTGGGAGTTACCAGATAAATCTTTCCTTCCTAATAGGGACATGGAATGGTTCTTTTTCTGTCCAAGGGACAAAAAGTATCCAAACGGTTTACGAACCAATAGGGCTACAAAAGCCGGTTACTGGAAACCAACTGGTAAAGATCGAAAAATAACTTGTAGATCATCGGGATACCGGAAAACACTAGTTTTCTATGAAGGTCGTGCTCCATTGGGCAAGAGAACTAATTGGTTTATGCATGAATATCGTCTA…
	PROTEIN	MQLGSSCLPPGFRFHPTDQELIGYYLTRKTEGLEIELEVIPAIDLYKFDPWELPDKSFLPNRDMEWFFFCPRDKKYPNGLRTNRATKAGYWKPTGKDRKITCRSSGYRKTLVFYEGRAPLGKRTNWFMHEYRLNDDDLSQKSSKFKGAFALCRVVKKNQLKRTLKNKNEQAVGSGCSSLATSPCRDGTTQFQSFNPSSTTTNKSSSMWISPDFILDSSKDYPQIQEVASEYFPNFHFPVNVANHHVGLPVSSSYLNVDQDIDQSMQTGYPNYEYDQTGSSGSSNLF
BniB008985	CDS	ATGATGAAAGGAGGGGCTGGTTTGCAATTTCCACCGGGATTTAGATTTCATCCGACGGATGAGGAGCTCGTCCTCATGTATCTCTGCCGTAAATGCGCGTCGCAGCCGATCCCTGCCCCTATCATCACCGAACTCGATTTGTATAGATATGATCCTTGGGACCTTCCCGACATGGCTTTGTATGGAGAAAAGGAGTGGTATTTTTTCTCACCAAGAGACCGAAAGTACCCAAACGGCTCAAGACCGAACAGGGCTGCTGGTACTGGCTATTGGAAAGCTACAGGTGCTGATAAACCGATCGGTCGTCCTAAACCAGTCGGTATAAAGAAGGCTCTAGTGTTTTATTCCGGGAAGCCTCCGAGAGGAGAGAAAACCAATTGGATTATGCACGAATACCGG…
	PROTEIN	MMKGGAGLQFPPGFRFHPTDEELVLMYLCRKCASQPIPAPIITELDLYRYDPWDLPDMALYGEKEWYFFSPRDRKYPNGSRPNRAAGTGYWKATGADKPIGRPKPVGIKKALVFYSGKPPRGEKTNWIMHEYRLADVDRSVRKGNSLRLDDWVLCRIYNKKGVIEKRRSEVENGHVTAPVMINFDKPEMTGGSSCSDQHVVSPEFTCEAQTEPSRWGNGLQLPFSYVDAIADNEIVSRLLGGNQMWSTLDPLVVRHRTF
BniB012771	CDS	ATGAGCAAGAGTAATCATGCTGCTTCGGTGACGGGTTCGGATATAATAGATGCAAAGATCGAAGAACATCAACTTTGTGGATCCAAGAAGTGTCCCAGCTGCGGCCACAAGCTCGAGGGGAAACCAGATTGGGTTGGTTTACCCGCAGGAGTGAAATTTGACCCAACAGATCAGGAATTGATAGAACATTTAGAGGCAAAAGTCTTAGGGAAAGACATTAAATCTCACCCTCTCATTGACGAATTCATCCCCACCATTGAAGGCGAAGACGGCATTTGCTACACTCATCCCGAGAAGCTTCCCGGAGTGACTAGAGATGGTTTAAGCAGACACTTCTTTCATAGACCATCAAAGGCGTATACGACGGGAACAAGAAAGCGAAGGAAGATTCAAACGGAA…
	PROTEIN	MSKSNHAASVTGSDIIDAKIEEHQLCGSKKCPSCGHKLEGKPDWVGLPAGVKFDPTDQELIEHLEAKVLGKDIKSHPLIDEFIPTIEGEDGICYTHPEKLPGVTRDGLSRHFFHRPSKAYTTGTRKRRKIQTECDNNMQGSGSSGETRWHKTGKTRPVMVNGKQKGCKKILVLYTNFGKNRKPEKTNWVMHQYHLGTHEEEKEGELVVSKIFYQTQPRQCNWSSTSSLNAIGGGGGEANSGGGGGEYLMRRDSGTTSGGSCSSSREIMNVNPLNRSDEVGGAMAVPAAATAVAAGLPSYAMDQLSFVPFMKSFDEVCAEFCFIPFKIFV
BniB014394	CDS	ATGGAGAATAATCTGGTGGGATATAGATTTAGTCCTACTGGAGAGGAACTGATCAACCATTACCTCAAGAACAAGATTCTTGGTAATTCATGGCTCGTCGACCATGCCATTAGCGAGGTCAACATCTGTCGTTACCAACCATGGTTTTTGCCTTCGTTATCGAAGCTCGAATCGAAGGATCTTGTATGGTACTTCTTCTCTCCTAAGGAGTACACGTCTGAGAAGAAGAATGTAACGAAGAGAACTACACCTTCTGGATATTGGAAAGCTACAGGGGTTGATAGAAAAATCAAGGATAGGAGAGGAAATGGTGTTGAGATTGGTATTAAGAAGACGCTTGTGTACTATGAAGGTAGGGTTCCTAATGGAGTTTGGACTCCTTGGGTCATGCACGAGTAT…
	PROTEIN	MENNLVGYRFSPTGEELINHYLKNKILGNSWLVDHAISEVNICRYQPWFLPSLSKLESKDLVWYFFSPKEYTSEKKNVTKRTTPSGYWKATGVDRKIKDRRGNGVEIGIKKTLVYYEGRVPNGVWTPWVMHEYHIMSLPLNQRTYVICQVMYKGDGGDSLYGNNSNEPSSSMVSDSHTFRAINTSPEVEQQCQEDGMSMYDLLIPLNQQEDLSPCNVFNPNKIFTDNNNCYPQTPYGDDYWNGLLDYNGGNFEDVFRNQELIMQENQSNHRPKRPLTGIIVDDSCSDSDAESISATSYRGTSSPGDSDGSVDEIMWLRKGSSKDIQTSINGKTRGPRFTRRTIPSKQEVKEGKSKANDDASLDNKALSSMVKTEKKGWFITEEAMQRNHKNPPYIYLMN…
BniB015922	CDS	ATGGATAACATAATGCAATCGTGTATGCCACCGGGATTCCGTTTTCATCCAACAGAGGAAGAGCTCGTGGGTTATTACCTAGATAGGAAGATCAATTCAATGAAGAGTTCTTTAGATGTTATTGTAGAGATTGACCTCTACAAAATGGAGCCATGGGATATTCAAGCGAGATGCAAACTAGGGTATGAAGAACAAAACGAGTGGTACTTCTTTAGCCATAAGGATAGGAAGTACCCGACCGGAACTAGGACCAATAGAGCCACGGTCGCCGGGTTCTGGAAGGCCACCGGTAGAGACAAGGCGGTTCTTTCAAAGAATAGTGTCATAGGAATGAGAAAGACACTTGTCTACTACAAAGGTCGAGCTCCTAATGGAAGAAAATCAGATTGGATCATGCAC…
	PROTEIN	MDNIMQSCMPPGFRFHPTEEELVGYYLDRKINSMKSSLDVIVEIDLYKMEPWDIQARCKLGYEEQNEWYFFSHKDRKYPTGTRTNRATVAGFWKATGRDKAVLSKNSVIGMRKTLVYYKGRAPNGRKSDWIMHEYRLQNSELAPVQEEGWVVCRAFRKPIPNQRPLGYETWQNQLYHVDNSNNYSSSATMNTSHHIGASSSSQNLNQMVMSNNHYKANNLSSTMHQYGNIELPQLESPSLSPSLGTNKDRNESLEQEEEKSFNYVDWRTLDSLLEIQVTHQQNPSVLMSSFETQTYNLEHSFPSMHQNYNYEIGKRRDKLLNYMLFLRITPTLPNLFINLASPIVDVPFHVFFLGTLVGLIPAAYITVRAGLAIGDLESVKDLYDFKTLSVLFLIGFIS…
BniB018423	CDS	ATGACTTGGTGCAATGACCGTAGCGATGTTCAGACCGTTGAAAGAATCATTCCTTCCCCAACAGCGGCCGAGTCTCCTGCAGCCTCATTTCAAGTCTCTACTCACAAAACGTGTCCTTCTTGTGGCCATAAATTCAAGTTTCATGAACAGGCGGGGATCCATGACTTGCCGGGACTGCCTGCCGGAGTGAAGTTCGATCCGACAGATCAAGAGGTACTGGAGCATCTCGAAGGAAAGGTAAGAGACGACGCAAGAAAGCTTCATCCTCTCATCGATGAGTTTATTCGTACCATCGACGGTGAAAACGGCATCTGCTATACCCATCCTGAGAAATTGCCAGGTGTGAGCAAGGACGGGACGGTCCGTCATTTCTTTCACCGACCGTCGAAGGCATACACG…
	PROTEIN	MTWCNDRSDVQTVERIIPSPTAAESPAASFQVSTHKTCPSCGHKFKFHEQAGIHDLPGLPAGVKFDPTDQEVLEHLEGKVRDDARKLHPLIDEFIRTIDGENGICYTHPEKLPGVSKDGTVRHFFHRPSKAYTTGTRKRRKVHTDSDVGGETRWHKTGKTRPVLTGGRVRGYKKILVLYTNYGKQKKPEKTNWVMHQYHLGTNEEEKEGELVVSKVFYQTQPRQCGGSVAAAATAKEQPYLHGHGHHIHYQLHHNNGNVKGNGGGGSAGAGDYYNNIPAIISFNQTGIQNHMVHDSQAFIP
BniB018462	CDS	ATGAACAAGAGTAATCCTGCTGGTTCAGTGACCGGCTCGGATATAATTGACGCAAAGATCGAAGAGCATCAACTCTGTGGATCCAAGAAGTGTCCCAGCTGCGGCCACAAGCTTGAGGGCAAACCAAATTGGGTTGGTTTACCCGCAGGAGTGAAATTTGACCCAACGGATCAAGAGTTGATAGAACATTTAGAGGCAAAAGTCTTCGTTAAAGACAATAAATCTCACCCTTTAATTGACGAATTCATCCCGACCATTGAAGGCGAAGACGGCATTTGCTACACACATCCCGAGAAACTTCCCGGAGTGACTAGAGATGGTTTAAGCAGACACTTCTTTCATAGACCCTCAAAGGCGTATACGACAGGAACAAGAAAGCGAAGAAAGATTCAAACAGAA…
	PROTEIN	MNKSNPAGSVTGSDIIDAKIEEHQLCGSKKCPSCGHKLEGKPNWVGLPAGVKFDPTDQELIEHLEAKVFVKDNKSHPLIDEFIPTIEGEDGICYTHPEKLPGVTRDGLSRHFFHRPSKAYTTGTRKRRKIQTECDSNNMHGSGSSGETRWHKTGKTRPVMTQPRQCNWSSSTSSLNAIGGGGGEANSGGGGEYNMRRDSGTTSGGSCSSSREIVNVNPQNRSEEVCGVGGGVMAVAAAAAAVAAGLPSYAMDQLSFVPFMKSFDEVARRETLQTEQATCEDVMAEQLRHRHQESPSSTSHHHHHHHHQQHQRYHAFNISQPTHPMSTIISPSTSLHHAPINILDDNPYHVHRILLPNESYQVR
BniB018728	CDS	ATGGGTTTGAAAGATATTGGATCCAAATTGCCACCGGGGTTTCGGTTTCATCCAAGCGACGAAGAGTTGGTTTGTCACTATCTTTGCAACAAGATAAGGGCCAAATACGGCCATGGTGATGTTCAGGATGATGACGCTGATGAAGCCTTGAATGGTGCTACTGATCTTGTGGAGATTGACTTACATATTTGTGAGCCATGGCAGCTTCCTGATGTGGCAAAGCTGAACGCAAAAGAATGGTACTTCTTCAGTTTCCGCGATAGAAAATATGCGACTGGATATCGTACAAATAGAGCGACAGTAAGCGGATACTGGAAAGCAACAGGTAAAGATCGGACGGTGATGGATCCACGAACAAACCAATTGGTAGGGATGAGAAAAACACTGGTCTTCTACAGA…
	PROTEIN	MGLKDIGSKLPPGFRFHPSDEELVCHYLCNKIRAKYGHGDVQDDDADEALNGATDLVEIDLHICEPWQLPDVAKLNAKEWYFFSFRDRKYATGYRTNRATVSGYWKATGKDRTVMDPRTNQLVGMRKTLVFYRNRAPNGIKTTWIMHEFRLECPNMPPKEDWVLCRVFNKCRDSSLQDNNNEHQTQRFEVSDAPDLNYNNQSQPPLLSPPSTTIDPPHHHDQWEQLMKQPSMSTDHPYHYNCQHQTVACGWEQMMIGSMSSSSSHGRDRESLLNLLYADNNNSVNITDDNYGQNYEKILLSSDITSLNHDKTCMASSSDGGMVSDLHMECVGLSFETENLLAFH
BniB018779	CDS	ATGGGTGTTAGAGAGAAGGATCCGTTAGCCCAATTGAGCTTACCTCCAGGTTTTCGTTTTTACCCGACAGACGAAGAGCTTCTTGTTCAGTATCTCTGTCGGAAAGTCGCAGGCTATCATTTCTCGCTCCAGATCATCGGAGATATTGATCTCTATAAGTTCGATCCTTGGGATTTGCCAAGTAAGGCCTTGTTTGGGGAGAAGGAATGGTACTTCTTTAGCCCGAGAGATCGTAAATATCCTAACGGGTCAAGACCCAACAGAGTAGCCGGGTCGGGTTACTGGAAGGCAACGGGTACCGACAAGATCATCACGTCGGATGGTCACCGTGTCGGGATTAAAAAAGCTCTGGTTTTCTACGCCGGAAAAGCTCCAAAAGGCACGAAAACGAACTGGATT…
	PROTEIN	MGVREKDPLAQLSLPPGFRFYPTDEELLVQYLCRKVAGYHFSLQIIGDIDLYKFDPWDLPSKALFGEKEWYFFSPRDRKYPNGSRPNRVAGSGYWKATGTDKIITSDGHRVGIKKALVFYAGKAPKGTKTNWIMHEYRLIENSRSHGSSKLDDWVLCRIYKKTSASQRQAVVSPVQACLEDHSTNGSPSSSSSQLDDVLDSFPEMKDRAFDLPRMNSLRTLLNGNFDWASLAGLNQMPELAPMSNGLSSYGGYHAFQSAESGCRNYSQVDQEQNSSELTQSFGYGSSGFGLSGQRERLM
BniB023362	CDS	ATGGGTCGCGACTTCATGAGTACTGACCGGGTTTTGCCGGCGTCGGAGGCAGCTCTGGCTCCTGGATTCCGATTTCGTCCAACCGATGAAGAACTCATCAGCTACTACTTAAAGCGGAAGGTTCAGGGAAAACCATTGGCTCTCGATTTGATTGGGGAAGTGGATGTTTACAAGCAAGAAGACCCCTCTCACTTACCAGTTGATGGGGTTAACTACTGTTTTCAAGAGAAATCGAAGATGAAGACAAAGGACCGAGAATGGCTCTTCTTCACTACTCTAGAAAGGCACGAAAAACGTGGTTGTATAAAGCGAGCAACAACCAAAGGAAATCAAGCGAGGAGGAGGAGACGACGGTCAGGTGGTTGCCGTGGCTGTGGATCTGATGATCTCTTTCTTGAT…
	PROTEIN	MGRDFMSTDRVLPASEAALAPGFRFRPTDEELISYYLKRKVQGKPLALDLIGEVDVYKQEDPSHLPVDGVNYCFQEKSKMKTKDREWLFFTTLERHEKRGCIKRATTKGNQARRRRRRSGGCRGCGSDDLFLDTTLYLCDSVQTDAYVLCRLSNNSENINAPFSEQEWDDVSGRSLVPSLVLANETIQQESDSGSKNLFDLNELSREFDMNDDPKTVDQDDACLLPCVLNKEAHLPFIQYKRKRQIDYANSIQTTHQDHCSSPKTTSEATPSVDAAMLEESEPEPVDTTMVPTTSSHTEADQGSAEGEPADGCGAEEVDA
BniB023429	CDS	ATGGGGAAAACTCAGCTGGCTCCTGGATTCCGGTTTCATCCCACTGATGTCGAACTCGTGAGGTATTACTTGAAGAGGAAGGTGTTAGGGAAAAAGCTCCTCGTTGATGCAATTGCTGAACTTGACATTTACAAGTTCGAGCCTTCTGATTTACCCGACAAGTCCTATATAAAGAGTGGGGATCTTAAGTGGCACTTCTTCTGCCCAAGGGAAAAGAAATATTCAACTGGAGTTAGGGCAAACCGTGCAACTGCGTGTGGTTACTGGAAGACCACAGGGAAGGACAGAGATGTTTTGTGCAATGGTGAAGTTGCGGGAAAGATTAAGACTCTGGTTTATCACTTTGGCAAGTCTCCTCGTGGAGAGCGGACTGATTGGGTTATGCATGAATACAGGCTT…
	PROTEIN	MGKTQLAPGFRFHPTDVELVRYYLKRKVLGKKLLVDAIAELDIYKFEPSDLPDKSYIKSGDLKWHFFCPREKKYSTGVRANRATACGYWKTTGKDRDVLCNGEVAGKIKTLVYHFGKSPRGERTDWVMHEYRLEDKALTQKNVPQDTYVLCVLFKKDGPGPRNGAQYGAPFKDEDWSDGEQHTDVPAINHPAILHGETSLVVASSHVPNKDCFGGMISESCVSDFVPAATTTSDLPQLNDAANTPMPAAPLLDSNNIASLAPPTLEAPSNYDDIYSMLDLFVDEDEYLRFSELNNSEIRHDANVSAPICLGEGEGIFSDLPDFSNMQHNSMPRTPSYDLIENSELYLELQDLTAPLAPPQIGNASDPYLSHQGQFDFSAAANDDDPYVFSASMGHGPDI
BniB023433	CDS	ATGAAAGCAGAGCTAAACTTACCAGCAGGATTCCGATTCCATCCAACGGACGAAGAGCTTGTGAATTTCTACTTGTGCCGTAAATGCGCATCGGAGCAGATCTCAGCTCCGGTTATCGCCGAAATCGATCTCTACAAGTTCAATCCTTGGGAGCTTCCTGAGATGTCTCTGTACGGAGAGAAAGAGTGGTACTTCTTCTCACCTAGAGACCGGAAATACCCAAACGGTTCGCGTCCTAACCGAGCAGCAGGAACCGGTTATTGGAAAGCCACCGGAGCTGATAAACCGATCGGTAAACCGAAGACGTTGGGTATAAAGAAAGCTCTCGTCTTCTACGCTGGGAAAGCTCCTAAAGGGATTAAAACGAATTGGATTATGCACGAGTATCGCCTCGCTAAT…
	PROTEIN	MKAELNLPAGFRFHPTDEELVNFYLCRKCASEQISAPVIAEIDLYKFNPWELPEMSLYGEKEWYFFSPRDRKYPNGSRPNRAAGTGYWKATGADKPIGKPKTLGIKKALVFYAGKAPKGIKTNWIMHEYRLANVDRSASVHKKNNLRLDDWVLCRIYNKKGTMEKYYPADEKPKAMAAQSSSPFDTSDSTYPTLQEDDSSSSGGRVVSPDAREVQSEPKWGELENAFDTSMFGGSMDLLQSEAFVPQFLYQPSDYFNSWQDSPEQKPFLNWSFAPQG
BniB023649	CDS	ATGGGTCGCGGCTCAGTGACGTCACTCGCTCCTGGGTTCCGTTTCCACCCCACAGACGAAGAACTCGTTCGCTACTACCTCAAGCGCAAGGTCTGCAACAGACCCTTCAACTTCGAGGCTATCTCCGTCACCGATGTATACAAGTCCGAGCCTTGGGATCTACCAGACAAGTCGAAGCTGAAAAGCAGAGACTTGGAGTGGTACTTCTTCAGCATGCTCGATAAGAAGTACAGTAACGGTTCCAAGACGAATCGTGCTACTGAGAAAGGGTACTGGAAGACGACGGGGAAGGATCGGGAGATTCTTCGTAATGGTTCGAGAGCTGTGGGGATGAAGAAGACGCTTGTCTATCATAAAGGTCGAGCTCCTCGTGGTGAAAGGACTAATTGGGTTATGCAT…
	PROTEIN	MGRGSVTSLAPGFRFHPTDEELVRYYLKRKVCNRPFNFEAISVTDVYKSEPWDLPDKSKLKSRDLEWYFFSMLDKKYSNGSKTNRATEKGYWKTTGKDREILRNGSRAVGMKKTLVYHKGRAPRGERTNWVMHEYRLTDDELKKTGAPQDAFVLCRIFQKSGTGPKNGEQYGAPYVEEEWEEDKMTFVPEQDSLLSEGLAVDGDVYLDMEEKPENLVVYDAIPAQTNYCHGESSNNVESGNYEDSGNYIPPGNCVVDSGGYFEQPIETFEEDQKPIIRDGIIQPCSLFPDEQIGCGVEDENEVNLKASSDNVFVADTRYSDIPIDDTNYMHEEPFMDHSNNLPLSDGLYLETNGGLQDDFNFEDYLDFLEDEDTQNLSLDVSQLLGSEDALPDQEGLDQ…
BniB023716	CDS	ATGGAAGCATTTAGTGGTTTTCACAAGGAAGATGATGAGCAGATGGTTTTGCCTCCTGGGTTTAGGTTCCATCCAACAGACGAAGAACTCATCACCCACTATCTCCACAACAAGGTTCTCAACATTGATTTCTCAGCTAAAGCTATTGGTGAAGTGGATTTGAACAAAGCTGAGCCATGGGAGTTGCCATATAAAGCAAAAATGGGTGAGAAAGAATGGTACTTTTTCTGTGTGAGGGATAGAAAGTATCCAACCGGTCTGAGGACTAACCGGGCAACTCAAGCAGGTTATTGGAAGGCTACAGGGAAGGATAAGGAGATTTTCAGAGGCAAATCACTAGTTGGTATGAAGAAAACACTTGTTTTCTACAGAGGAAGAGCTCCAAAAGGGCAGAAAACA…
	PROTEIN	MEAFSGFHKEDDEQMVLPPGFRFHPTDEELITHYLHNKVLNIDFSAKAIGEVDLNKAEPWELPYKAKMGEKEWYFFCVRDRKYPTGLRTNRATQAGYWKATGKDKEIFRGKSLVGMKKTLVFYRGRAPKGQKTNWVMHEYRLDGKLSAHNLPKTAKNEWVICRVFHKTAGGKKIPISALIQIGSYGGSSLPPLTDSSPYNDKTKTEQTFVPCFSNQTETRGTLLNYFSNNPALCSIPLYQPQSLHVSDPVLTQEQPVSQTMFENNRRQSYKTLSISQETGVSNTDTSSGYELGRKEFNHQEVPSSSTGPVDLEPFWRY
BniB023847	CDS	ATGGATAATGTTAAGCTCGTCAGGAATGGTGTTATGAGATTACCACCTGGATTCAGGTTTCATCCCACAGATGAGGAGCTTGTGGTTCAGTATCTCAAGAGAAAAGTCCTTTCTTCTCCATTACCAGCTTCCATCATTCCTGACTTTGATGTTTGCAGAGCTGATCCTTGGGACTTACCCGGCAATTTGGAGAAAGAGAGATACTTCTTCAGCACAAGGGAAGCCAAGTACCCAAATGGGAACCGGTCTAATCGAGCAACCGGTTCCGGTTATTGGAAAGCTACCGGTATAGATAGACGGGTCGTGACCTCTAGAGGAAATCAAATAGTTGGTCTGAAGAAAACACTTGTGTTCTACAAAGGCAAACCACCTCATGGCTCGAGAACCGATTGGATCATG…
	PROTEIN	MDNVKLVRNGVMRLPPGFRFHPTDEELVVQYLKRKVLSSPLPASIIPDFDVCRADPWDLPGNLEKERYFFSTREAKYPNGNRSNRATGSGYWKATGIDRRVVTSRGNQIVGLKKTLVFYKGKPPHGSRTDWIMHEYRLSSSPPSSMGPTQNWVLCRIFLKKRAGDKNGDDDGDNRNVRYDNDQTEIITTNQTEDKTKPIFFDFMRKEKTTDLNLLPGSPTSDHASSGLTTEIFSSDEETSSCNSFRRNL
BniB029013	CDS	ATGTCAAACAACTACGAAGATGGAGGAGTTTACTATGATCCAGACAAAAACTTGTTCAATAATGATGAAGATGGAGGAATTTACTTTAATCCTGAAGACCAAGTACTCATCGAAAAGCATCTTTTACCCAAATTAGAAACGTATCTACAACACAAGCAACACAAGTCAGAAAATGAAGAATGTGAAGACTTCATCGAGATGAAGAACGTTTACGATAAGGAGCCATGGTTGCTGGACCATATCAATCATCCTTTGTTCAAGAAGAACGAGTGGTTTTATTTCGTGACAAGGACTCAGGTGTCAGTGAAGAACATTGGTCGTGGTAGGAACTCGAAGAGGAGGATCAATGGAGACAACGATGGTGGGAGTTGGAAGCTTAACGCTAAAAAATATATTAAG…
	PROTEIN	MSNNYEDGGVYYDPDKNLFNNDEDGGIYFNPEDQVLIEKHLLPKLETYLQHKQHKSENEECEDFIEMKNVYDKEPWLLDHINHPLFKKNEWFYFVTRTQVSVKNIGRGRNSKRRINGDNDGGSWKLNAKKYIKDEETKEVIGKKQTLKFIRSDNNKKKQKRGDGTSVVVPGSNSSWIMHEYSLPDENTFQELVLCKIRKISNSKDEDDHHESILASSSEQQPTNIDHESVLAPLSLEHQQPVFFHRGEANMVHQIEDAFAMMEMVPRRSSRKDEEVEAMEVTHNVEEEGWIGDLSDKFASTGLCVQQQAPIYARSQSSDPPARLGYKSLPIEVDDKDEDEVIMNQELDEHLFQYTKEV
BniB036526	CDS	ATGCTTGCGGTGGAAGATGTGTTGAGCGAGCTCAACGGAGAAGAAATAAACGATAGAGGATTGCCACCAGGTTTCCGGTTTCACCCGACGGACGAAGAGCTCATAACATTCTACTTAGCTTCCAAAGTATTCCATGGAGGTCTCTGTGGCATATACATCGCTGAAGTTGATCTCAATCGCTGCGAGCCTTGGGAACTTCCAGAAATGGCAAAGATGGGAGAGAGAGAGTGGTACTTTTACAGTCTAAGGGATAGGAAGTATCCGACGGGGCTAAGGACTAATAGAGCCACGACTGCTGGATATTGGAAGGCCACCGGAAAAGATAAGGAGATATTTTCCGGCGGCGGTGGAGGAGCGCTTGTCGGGATGAAAAAGACGCTTGTGTTCTACAAGGGAAGG…
	PROTEIN	MLAVEDVLSELNGEEINDRGLPPGFRFHPTDEELITFYLASKVFHGGLCGIYIAEVDLNRCEPWELPEMAKMGEREWYFYSLRDRKYPTGLRTNRATTAGYWKATGKDKEIFSGGGGGALVGMKKTLVFYKGRAPRGLKSKWVMHEYRLETDHSHRHTCKEEWVICRVFNKTGDKKNVGSHNQISYRHNTSLSTTHHLETLPPLFEPSKNLTNFPPLLHDDTHQNYNNNLLHGISGHNVDELKALINPVVSQLNGVIFSPENNYYTNEENDNFGMKTEQYSNGDNTHPDARDYLENPLFQEAGYCLLGLSSSPGPLMLY
BniB045215	CDS	ATGGAATCAGTCGATCAGTCATGTAGTGTTCCTCCGGGATTCAGGTTCCATCCAACAGACGAAGAGCTCGTTGGTTACTATTTAAGGAAGAAAGTGGCATCACAAAAGATCGATCTTGATGTCATTAGAGATATCGATCTCTACAGAATCGAACCATGGGATTTACAAGAGAAATGCCGAATCGGATATGAGGAACGAAATGAATGGTATTTCTTCAGCCACAAAGATAAGAAATATCCAACAGGAACAAGGACGAACAGAGCGACCATTGCTGGTTTTTGGAAGGCCACAGGTCGGGACAAGGCTGTTTATGACAAGTCAAAACTAATGGGTATGAGGAAAACACTTGTATTCTACAAAGGAAGAGCTCCTAATGGCCAAAAAACAGATTGGATTATG…
	PROTEIN	MESVDQSCSVPPGFRFHPTDEELVGYYLRKKVASQKIDLDVIRDIDLYRIEPWDLQEKCRIGYEERNEWYFFSHKDKKYPTGTRTNRATIAGFWKATGRDKAVYDKSKLMGMRKTLVFYKGRAPNGQKTDWIMHEYRLESDENAPPQEEGWVVCRAFKKKPTTGQAKNTETWRSSYFYDELPSGVGSAMEPLNYVSKQKQNIFAQDLLFKQELEGSDIGLNFIHCDQFIQLPQLESPSVPNMKRPMSSTSIASSEKIHNKYKRPLIEEDELINSQHKDKRKRTSVVTTDWRALDKFVASQLMSQEHGVLDFGGHQEDDIKNTGHCNNEESINNNGIEMASSSLLSDREEENRFISGFLCTNLDDDLYRDLHV
BniB000325	CDS	ATGGAGACGTTTTGCGGGTTTCAAAAGGAAGAAGAGCAGATGGATTTACCTCCAGGGTTCAGGTTTCATCCAACAGATGAAGAACTCATAAGTCACTATCTCCACAAGAAGGTTCTCGACATCAGCTTCTCAGCCAAAGCTATTGGTGAAGTTGACTTGAACAAATCTGAGCCATGGGAGTTACCATGGATGGCAAAAATGGGTGAGAAAGAATGGTACTTCTTCTGTGTTAGGGACAGAAAATATCCGACCGGTTTAAGGACTAACCGGGCAACTGAAGCCGGTTATTGGAAGGCAACCGGGAAGGATAAGGAGATTTACCGTGGTAAATCCCTTGTTGGGATGAAGAAGACACTTGTTTTCTATAGAGGAAGGGCTCCTAAAGGTCAGAAAACCAAT…
	PROTEIN	METFCGFQKEEEQMDLPPGFRFHPTDEELISHYLHKKVLDISFSAKAIGEVDLNKSEPWELPWMAKMGEKEWYFFCVRDRKYPTGLRTNRATEAGYWKATGKDKEIYRGKSLVGMKKTLVFYRGRAPKGQKTNWVMHEYRLEGKLSAHNLPKTAKNEWVICRVFQKSAGGKKIPISSLIRIGSLGTDFSPSLMPSLTDASTFNDKTKTEPVYVPCFSNQTDQAQGNTLNCYSSPNLSSIQADIFHRIPLYQTQSLQVSGNLQSPLMGQEHSVLHAMIDNNRRESLKVMSVSQETAVSTDMNTDISSDFEYGKGRAQEDPSSSAGPVDLEPFWNY
BniB001319	CDS	ATGGGTCGCGGCTCAGTGACGTCGCTAGCTCCAGGGTTCCGTTTCCACCCGACCGACGAGGAGCTCGTCCGCTACTACCTCAAGCGCAAGGTCTGCAACAAACCCTTTAAGTTCGATGCTATCTCCGTCACTGATATCTACAAATCCGAGCCCTGGGATCTACCAGACAAGTCGAAGCTGAAAAGTAGAGACTTGGAGTGGTACTTCTTTAGTATGCTTGACAAAAAGTACAGCAACGGTTCAAAGACGAACCGTGCCACGGAGAAAGGATACTGGAAGACGACTGGGAAGGATCGGGAGATTCGTAACGGCTCGAGGGCCATAGGGATGAAGAAGACCCTTGTTTATCACAGGGGTCGAGCTCCTCGTGGTGAAAGGACTAATTGGGTTATGCACGAG…
	PROTEIN	MGRGSVTSLAPGFRFHPTDEELVRYYLKRKVCNKPFKFDAISVTDIYKSEPWDLPDKSKLKSRDLEWYFFSMLDKKYSNGSKTNRATEKGYWKTTGKDREIRNGSRAIGMKKTLVYHRGRAPRGERTNWVMHEYRLTDEELKIAGVPQDAFVLCRIFQKSGTGPKNGEQYGAPYLEEEWEEDKMTFVPEQDALTEGLAVEDDVYVDIDDIDEKPENLVVYDAIPVQTNYCHGESSNNAESGNYEDAGNNVPPGNYVVDSGGYIEQPFETFEGDQKPIIRDCSIQPCSLFPDEQIGYDVQDENAENLETSNNNVFVAEADSCYSDIPIEANYLPDEPFMDPSNNLPLCDDLYLEKNDLSGGLQDDFNFEDYLNFFDDEDAQNLTLDVSQLLGSEDALPNQ…
BniB001465	CDS	ATGGAGACTTTTGGTGGGGTTCACAAGGAAGATGAGGAGCAGATGGATTTGCCTCCGGGGTTTAGGTTTCATCCCACAGACGAAGAACTCATAACCCACTATCTACACAAGAAGGTTCTCAACATTGATTTCTCGGCTAAAGCTATTGGCGAGGTGGATTTGAACCAAGCTGAGCCATGGGAATTGCCGTATAAAGCAAAAATGGGTGAGAAAGAATGGTACTTCTTCTGTGTGAGGGATAAGAAGTATCCAACCGGTCTGAGGACTAACCGGGCAACTCAAGCCGGTTATTGGAAGGCAACCGGGAAGGATAAGGAGATTTTCAGAGGCAAATCACTTGTTGGTATGAAGAAAACACTTGTTTTCTACAGAGGAAGAGCTCCAAAAGGCTTGAAAACA…
	PROTEIN	METFGGVHKEDEEQMDLPPGFRFHPTDEELITHYLHKKVLNIDFSAKAIGEVDLNQAEPWELPYKAKMGEKEWYFFCVRDKKYPTGLRTNRATQAGYWKATGKDKEIFRGKSLVGMKKTLVFYRGRAPKGLKTNWVMHEYRLDGKLSAHNLPKTAKNEWVICRVFHKTDGGKKIPLSTLIQIGSYGGSSLPPLTDSLPYNDKTKTEPVYVPCFSNQTETRGTILNCFSNPALSLIQPDFLHRIPLYQPQSLHVSENLQSTNPIHTHEQTVSQAMFGSRRRQSFRTVGTSHETRGLDHQEVPSSSAGPVDFESFWSY
BniB001635	CDS	ATGACTGATCCTGTTTCTGGTAATGATGCTTCGGCGGTGAAACCGATAGCTCCTGGCTTCAGATTTCATCCAACTGATGAAGAGCTCGTCACCTATTACTTGAAGAGGAAGGTTCAGGGAAAACCAATGCGTTTCGAAGCAATTGGGGAAGTCAATGTTTACAAGCACGAGCCCTCTGACTTAGCAGAGTATTCGAGGTTGAAAACAAAGGACCAAGAATGGTTCTTCTTCTGTGCCCTGGAGAAGAAGCACAACAGCCGTACTGTTATAAACCGAGCAACGAAGACAGGCTACTGGAAAAAAACAGGAGTAGACAAAGAGATCAAGCGAGGGGAGGGCGATAAGTTGATTGGTGTGGTCAAGAGCCTCGTGTTTTACAAAGGACGTGCTCCAAAGGGT…
	PROTEIN	MTDPVSGNDASAVKPIAPGFRFHPTDEELVTYYLKRKVQGKPMRFEAIGEVNVYKHEPSDLAEYSRLKTKDQEWFFFCALEKKHNSRTVINRATKTGYWKKTGVDKEIKRGEGDKLIGVVKSLVFYKGRAPKGNRTNWIIHEYHLVGNKLEIDSYVLCRVFLKEHAGPPTGCIYAQDWDDDDDDGINAKIQQENHLQSKKLSDNNNQEPLTRECIPFCVNKEAPFPLTQYKRKRQIDDSFRSYNNNSSQTTQDHCENEPEPVATMVPTTSSSTELINHLETEKQQMAVERGTYQLDLMSAEVMASFLQGKIDALRAENEELKKTTNSNKG
BniB001711	CDS	ATGGGGAAAACTGAATTGGCTCCTGGATTTCGGTTTCATCCGACTGATGTTGAACTCGTGAGATATTACTTGAAGAGGAAGGTGTTGGGGAAAAAGCTCCTCGTTGATGCAATTGCTGAACTTGACATTTACAAGTTCGAACCCTCTGACTTACCCGATAAGTCCTTTATAAAGAGTGGGGATCTTAAGTGGCACTTTTTCTGCCCAAGGGAAAAGAAATACGCAACCGGCGTTAGGGCAAACCGTGCAACTGAGTGTGGTTACTGGAAGACCACAGGGAAGGAGAGAGCCGTTCTGTGCAATGGTGAAGTTGTTGGAAAGATTAAGACTCTGGTTTATCACGTTGGTAAGTCGCCTCGTGGGGAGCGGACTGATTGGGTTATGCATGAATACAGGCTT…
	PROTEIN	MGKTELAPGFRFHPTDVELVRYYLKRKVLGKKLLVDAIAELDIYKFEPSDLPDKSFIKSGDLKWHFFCPREKKYATGVRANRATECGYWKTTGKERAVLCNGEVVGKIKTLVYHVGKSPRGERTDWVMHEYRLEDSVLTQKNVPQDTYVLCVLFKKDGPGPRNGAQYGAPFKEEDWSDEEHRTDVLATNNPAIFLHGPNEETSHAVAAPSHDPNKACFGGMISESCVSDFPPATATATISGTAHLTDAANTPVSAPLLDPNSNAAMAQTLQVPNDDDDIYSMLDLFVDEDEYLRFYEANNNEVRHDPNVSAPIRLGDEVIFDDLPDFSSMHNNSMPRTPSCDLIENSELYLELQDLTTPLAPPHIWNVSDSYLTAPLAPPQVGNVSDSYLTAPLAQPRI…
BniB001717	CDS	ATGAAAGCAGAGCTGAACTTACCTGCAGGATTCAGATTCCATCCGACGGACGAAGAGCTTGTGAAATTCTACTTGTGCCGGAAATGCGCATCGGAGCAGATCTCAGCTCCGGTTATCGCCGAAATCGATCTTTATAAGTTCAATCCTTGGGAGCTTCCAGAGATGTCTCTGTACGGAGAGAAAGAGTGGTACTTCTTCTCACCTCGAGACCGGAAATACCCAAACGGCTCCCGTCCAAACCGAGCAGCAGGAACCGGTTATTGGAAAGCCACCGGAGCAGATAAACCAATCGGTAAACCGAAGACGTTGGGTATTAAGAAAGCACTCGTCTTCTACGCTGGGAAAGCTCCAAAAGGGATTAAAACGAATTGGATAATGCACGAGTATCGTCTCGCTAAT…
	PROTEIN	MKAELNLPAGFRFHPTDEELVKFYLCRKCASEQISAPVIAEIDLYKFNPWELPEMSLYGEKEWYFFSPRDRKYPNGSRPNRAAGTGYWKATGADKPIGKPKTLGIKKALVFYAGKAPKGIKTNWIMHEYRLANVDRSASVNKKNNLRLDDWVLCRIYNKKGTMEKYYPADEKPRTTTSTADQSSSPFDTSDSTYQNDSSSSGGHVVTPDAKEVQSEPKWGELEDALEAFDTSMFGSSMDLLQSDGFVPQYLYQPDYFTPFQDPHEQKPFLNWSFAPQG
BniB002049	CDS	ATGGACGATCACTCTATAATATCTCAAGAAGACATGGGACACGACGACTACGCAACATTATCTCAAGAAGATCACTTGGTATTATATCAAGAAGACAACCAAATCGAACCAGAAGACGAGATCATAATCTCGTACTATCTGAACATGATGATCAACAACCGCAAATCCTGGCCTAACCACTTTCTCCGAGACGAAGAAGCGAACGTGTACAACCTGAATCCATGGAGTCGCTTCAATACTCCGAACCCTAACTACTTCGTCTTCGTCAAACGCAGAACAGATTCTTGCGGTAAGACCGATGGAAGTGTGTCTGGTTGCTGGAGGATCATGGCCCGTGATAAACTGATCAAGTCCGAGGAGACCGGGAGGATTCTAGGGTTCAAGAAGATTCTCAAGTTC…
	PROTEIN	MDDHSIISQEDMGHDDYATLSQEDHLVLYQEDNQIEPEDEIIISYYLNMMINNRKSWPNHFLRDEEANVYNLNPWSRFNTPNPNYFVFVKRRTDSCGKTDGSVSGCWRIMARDKLIKSEETGRILGFKKILKFCENDKKRSGEDEEEQTIWVMEEYRLVDKWKQDQVICKIRVLLQHEVTSLLAKHFSFLSRWIMPFSRRSFMPRWDLCGPTIPTDEIILYYLKMCVDARNDWPSHFLRSELVYGVVPWMIVDADRSSVELQEEGPYFFVNRTESSGRTDGCDGGCWRIMRRDRVITSKRNKVLGFKRLFKFCVKEEAEPVYKFWADEKYKVNECKVTWVIDEYRLVKKKEQGQVICRISLLFPAPLNSHFEHF
BniB003716	CDS	ATGGCTCCGGTATCGTTGCCTCCTGGTTTTAGGTTCCATCCAACCGACGAGGAACTAATCACTTACTATCTCAAAAGAAAGATCAACGGTCGAGAGATTGAGCTAGAGATTATCCCTGAAGTAGACCTCTACAAGTGCGAACCATGGGACTTGCCAGGCAAATCGTTGCTTCCGAGCAAAGACCAAGAATGGTACTTTTTCAGTCCACGGGACAGAAAATACCCCAATGGTTCAAGAACAAACCGGGCAACAAAAGGCGGTTATTGGAAAGCCACCGGCAAAGACCGGCGGGTGAGTCTGAGAGATCGAGCCATAGGAACCAAGAAAACACTAGTTTACTACCGTGGACGCGCCCCACACGGTATTAGAACTGGTTGGGTCATGCATGAATATCGCCTC…
	PROTEIN	MAPVSLPPGFRFHPTDEELITYYLKRKINGREIELEIIPEVDLYKCEPWDLPGKSLLPSKDQEWYFFSPRDRKYPNGSRTNRATKGGYWKATGKDRRVSLRDRAIGTKKTLVYYRGRAPHGIRTGWVMHEYRLDETECEPTAFGMQDAYALCRVFKKIIIEAKPRDQHHQHHQPYVHTSSNISGSSSFDVCSDLEISSNTHQVLPYNNVTETQPRFGDHDDRSQYLSQDMPPSFSNYGSPYVPYLNQSMVYTETECGMLQNQISLTPLRAENTPVQTSVFSNGMSQNSGQCGFGDFTFAASNPNHLYNNNVDDHLIHIGNLDEQLLSAGNSTWMNMSNENLEKSFVQDKEILASFEDNDQNLEYYGGSRTNTINNIEIDELFSFEDRVEDIDKSNITLN…
BniB011774	CDS	ATGTCAAAAGAAATTGAGCTGCCAGGTTTCAGATTCCACCCGACCGAGGAGGAGCTACTTAATTACTACCTCAAGAACATGGTTTATGGGAATATATCGAAAGTTGAAGTCATTGGTTTTCTCAACATCTATCGTCATGATCCATGGGACTTACCTCGTTTATCTACAATTGGGGAGAGGGAATGGTATTTCTTTGTGCCACGGGAAAGGAAGCATGGGAACGGAGGAAGGCCAAGCAGGACAACTGAGAAAGGATATTGGAAAGCAACTGGATCCGATCGTAAGATCATAAGCCTGTCTGAACCAAAACGCATGATTGGGCTTAAGAAGACCCTTGTGTTCTACAGAGGAAGAGCACCTGGAGGAAGCAAGACTGATTGGGTCATGAACGAGTTCCGG…
	PROTEIN	MSKEIELPGFRFHPTEEELLNYYLKNMVYGNISKVEVIGFLNIYRHDPWDLPRLSTIGEREWYFFVPRERKHGNGGRPSRTTEKGYWKATGSDRKIISLSEPKRMIGLKKTLVFYRGRAPGGSKTDWVMNEFRMPDNCTLPKDVVLCKVYRKATSLKVLEQRAEMGAKMNQTCPNSPLSSSDTISFVGKEEDMMMTSYPFPQEAAMKEANNNNFMLQGHTEEKQRETEMKEPSSSLKLPCGVLPLPELQLPKQGFEWGQDQFFSISPWLQNLTPIVNLLNF
BniB013914	CDS	ATGGATAAGGTTAAACTCGTGAAGAATGGTGTTATGAGATTGCCACCTGGATTCAGATTTCATCCCACTGATGAGGAGCTTGTGGTTCAGTATCTGAAGAGAAAAGTCTTGTCTTCTCCGTTACCAGCTTCCATCATTCCTGACTTTGATGTTTGCAGAGCTGATCCTTGGGACTTACCTGGCAATTTGGAGAAGGAGAGGTACTTCTTCAGCACAAAGGAAGCTAAGTACCCAAACGGGAACCGGTCTAATCGAGCAACCGGTTCGGGTTACTGGAAAGCTACCGGTATTGATAAACGGGTAGTAACCTCTAGAGGAAATCAAATCGTTGGTTTGAAGAAAACACTCGTTTTCTACAGAGGCAAACCACCTCATGGCTCAAGAACCGATTGGATCATG…
	PROTEIN	MDKVKLVKNGVMRLPPGFRFHPTDEELVVQYLKRKVLSSPLPASIIPDFDVCRADPWDLPGNLEKERYFFSTKEAKYPNGNRSNRATGSGYWKATGIDKRVVTSRGNQIVGLKKTLVFYRGKPPHGSRTDWIMHEYRLSSSPPSSMGPTQNWVLCRIFLKKRAGSKSEDEEGDNRNTRYDNDQIEIITTNQTEDKTKPIFFDFMRKERTTDLNLLPSSSSSDHASSGLTTEVFSPDEETSCCNSFRKNL
BniB013946	CDS	ATGGAGGTGGAGAAGAGGACAATGGTGAATGGAGGCATGAAATTACCAATTGGATACAGATTTCATCCAACGGACCAGGAGCTTATCCTTCATTACCTGCTCCCAAAAGCATTTGCTTCTCCTTTGCCTTCCTCCATCATCCCTGTCTTTGACGTCTTCTCCTCTCATCCTCTTACTTTCCCAGGGGATCAAGAGGAGAATAAGAGGTACTTCTTCTGCAAGAAGAGAAGTGAAGTATCTGGTAATGCGCATCGAATCAAGATTTCATCTGGTGATGGTTACTGGAAACCTATTGGGAAAGAGAGAGGAATCATTGCTTGTGGTAGAACAGTTGGGATTAGGAGAACACTTGCTTTCCATGAAACAAACAAATCCTCTTCCTATTGCAACAAAACTAAA…
	PROTEIN	MEVEKRTMVNGGMKLPIGYRFHPTDQELILHYLLPKAFASPLPSSIIPVFDVFSSHPLTFPGDQEENKRYFFCKKRSEVSGNAHRIKISSGDGYWKPIGKERGIIACGRTVGIRRTLAFHETNKSSSYCNKTKWSMTEYSLAGFASAKVLEAWAVYNVYERKASKGSRQRKSVGSYDEEDLSCIDFTVGSDHETGPPPPSPPTSADESGSII
BniB017177	CDS	ATGGAACAAGGACATCATCAGCAGCAGAAGAAAGAAGAAGAGGCTTTGCCTCCAGGTTTCAGGTTTCATCCAACGGATGAGGAACTAATCTCGTATTACTTGGTTAATAAGATCGCTGATCAAAACTTCACTGGAAAAGCAATCGCCGATGTTGATCTCAACAAGTCCGAGCCTTGGGAGCTTCCTGAGAAGGCGAAAATGGGAGGAAAAGAATGGTATTTTTTTAGCCTACGCGACCGAAAGTACCCGACGGGTGTGAGAACAAACCGAGCGACCAATACAGGATATTGGAAAACCACAGGAAAAGACAAAGAGATACTCAACAGCACAACCTCAGAGTTGGTCGGAATGAAGAAGACTTTGGTCTTCTACAGAGGAAGAGCTCCTCGTGGGGAGAAG…
	PROTEIN	MEQGHHQQQKKEEEALPPGFRFHPTDEELISYYLVNKIADQNFTGKAIADVDLNKSEPWELPEKAKMGGKEWYFFSLRDRKYPTGVRTNRATNTGYWKTTGKDKEILNSTTSELVGMKKTLVFYRGRAPRGEKTSWVMHEYRLHSKSSYRTSKQDEWVVCRVLKKTEATKKYISNSSSSTSHHHPSHTRASILSTNNNNPNYSSNLLQLPAHLQPHTSLNINQTLMANAVHLAELSRVFRASTSSTMDSAHQQLMSYNHMPVSGLNLNLGGGLVQPAPLAVSLEDVVAVSASFNGQNGFRNVEMSQCMDLDGYWPSY
BniB017786	CDS	ATGGGAAGTTCATGTTTACCTCCAGGATTCCGGTTTCATCCTACTGATGAAGAACTCATCGACTATTACTTGAAAAGAAAAGTGGAAGGACTTGAGCTCGAGCTTGAAGTCATTCCGGTTATTGATCTTTATAAATTTGATCCTTGGGAGTTACCAGACAAGTCTTTTCTCCCAAACCGGGACATGGAATGGTTTTTCTTCTGTTCAAGGGACAAAAAATATCCTAATGGTTTTCGTACAAACCGAGGAACAAAGGCCGGTTACTGGAAAGCAACCGGAAAAGACCGGAAAATTACATGTCGTTCGTCTTCTACAATCGGCTATAGGAAAACCCTAGTTTTCTATAAAGGTCGTGCTCCGTTAGGCGATAGAACCAGTTGGCTCATGCATGAATATCGA…
	PROTEIN	MGSSCLPPGFRFHPTDEELIDYYLKRKVEGLELELEVIPVIDLYKFDPWELPDKSFLPNRDMEWFFFCSRDKKYPNGFRTNRGTKAGYWKATGKDRKITCRSSSTIGYRKTLVFYKGRAPLGDRTSWLMHEYRLCDDEGSSQGSQSFKGAFVLCRVAKKNEIKSNSKIQRTLSEQTLGSGESSGYSSRVTSPSGDGTMPFHTFVNPVSTETDSSNIWISPDFILDSSKDYPQIQDVAPEYFQNFDFPVLGNQNVDVPASTLNASVDQSMDESMQAGYWTNSWYDQTGLFD
BniB017879	CDS	ATGAGTAACCAAGTCAACAACAACAACAACAATGAAAAAGATATAGAAGAGGATACTCATGGAGGCGGCCACGAGAGTCGTGTTCAAAATGATGATGAAGCTGATGACCATGATCATGACATGGTCATGCCTGGATTCCGATTCCATCCCACCGAAGAAGAACTTATAGAGTTTTATCTTCGCCGGAAAGTAGAAGGCAAACGCTTCAATGTAGAACTCATCACTTTCCTCGATCTTTATCGCTACGATCCTTGGGAACTTCCAGCGATGGCGGCGATAGGAGAGAAAGAGTGGTACTTCTATGTGCCAAGAGATCGGAAGTATAGAAATGGAGATAGACCAAACCGAGTAACGACTTCGGGGTATTGGAAAGCCACCGGAGCTGATCGGATGATCAGA…
	PROTEIN	MSNQVNNNNNNEKDIEEDTHGGGHESRVQNDDEADDHDHDMVMPGFRFHPTEEELIEFYLRRKVEGKRFNVELITFLDLYRYDPWELPAMAAIGEKEWYFYVPRDRKYRNGDRPNRVTTSGYWKATGADRMIRSETSRPIGLKKTLVFYSGKAPKGTRTSWIMNEYRLPHHETEKYQKAEISLCRVYKRPGVEDHPSLPRSLSTRHHNHNSAASSSRLALRQQQQHHSSSSNHSDNNLNNNNNNINNNLDKLSTEYSGDGSTTTTTNSNSDVTIALANQNIYRPMPYGASNTPIVSTTNQEDDETAIVDDLQRLVNYQISDGVNINHQYYQIAQQFHNQQLSANANALQLVAAATTAALTPQTQAALAMNMIPAGTIPNNALWDMWNPLVPDHGNKDHY…
BniB018358	CDS	ATGATCGAAAACGGAGCATCCTGGACACAACACTTCTTCGAAGACGCAAACGTGTTCAACAAGAATCCAAGCAAAGTATTCAAAACTGTCTTCGTGATCGTTAAACCCCGAACAGAGGCATGTGGTAAAACCGACGGATGTGACTATGGTCGCTGGAGGATCATGGCCGGTGATAAAATGATCAAGAACGAGGAGACCGGGAAACTTCTAGGGTTCAAGAAGATCCTCAAATACTGCATAAAGAAGACGACGAGAGCCAGAGAGTACAAGAGAAGCTGGGTCATGGAAGAGTACAGGCTTCCGAGTAAATGGAACCCTAAGCAAGATCACGTGATTTGCAAGGTTCGGCTTTTGTTCCAAACCGAAATACGTTCCTTGCTATCCAAGCATTTCTCGTAT…
	PROTEIN	MIENGASWTQHFFEDANVFNKNPSKVFKTVFVIVKPRTEACGKTDGCDYGRWRIMAGDKMIKNEETGKLLGFKKILKYCIKKTTRAREYKRSWVMEEYRLPSKWNPKQDHVICKVRLLFQTEIRSLLSKHFSYSSGPLPATTRSLPAYGYRLPNGGEVGAYYLQHLVGHENEWPSHVTNDVYCMHPSALVDPYQDQMFARFGLCIFANRTEACGYTDGGCDSGCWRIMKGDKPISSITVMGETFGYMRVFKFCEVNGKPKYFYTDPDGEVVWMTWIMEEYRLAEEVMKGKVLCVIKFQGRR
BniB018882	CDS	ATGGAAGTGTTATCGCTTGACTCACTACCGGCGGGGTTCAGATTCAGTCCAACGGACGAGGAGTTAGTCCGTTACTATCTCCGTCAAAAGATCAACGGCCGTGATGACGACGTCAGAGTGATCCGTGCCATCGATATCTGCAAAAAGGAGCCATGGGATTTTCCTGTCTGTAAAAACGATCCCTCTGATGACGTTGATGATGTTGCAGATTTGTCTGTGGTGAAGACAACAGACTCAGAGTGGCTCTTCTTCTGTCCACTTGACCGCTCAACCGAGCTGTTCAGTAACCAGAATGGTGCTCATGTTCAGACTCAGTACGCTTCAGACGAGACCGACCAATCTATGTTTGAGCTCTTGGATTCGGTTCTTCAGTTTCCTTATGAGTTTCAAGAGCAGAAA…
	PROTEIN	MEVLSLDSLPAGFRFSPTDEELVRYYLRQKINGRDDDVRVIRAIDICKKEPWDFPVCKNDPSDDVDDVADLSVVKTTDSEWLFFCPLDRSTELFSNQNGAHVQTQYASDETDQSMFELLDSVLQFPYEFQEQKHVVQPTP
BniB019142	CDS	ATGCAAATGGGAAGTTCATGTTTACCTCCTGGATTTAGATTTCATCCAACTGATGAAGAGCTCATAGGCTATTACTTGAGTAGAAAAGTCGAAGGTCTCGAGATTGAACTTGAAGTCATTCCTGTTATCGATTTATACAAATTCGATCCTTGGGAGTTACCAGATAAATCGTTCCTACCCAATAGAGATATGGAATGGTTCTTTTTCTGTCCAAGGGACAAAAAATATCCAAACGGTTCTCGAACCAATAGGGCTACAAAAGCCGGTTATTGGAAAGCAACCGGTAAAGATCGGAAAATCACTTGTAAATCATCTGGTGCTATAACCGGATACCGGAAGACACTAGTTTTCTATGAAGGTCGTGCCCCATTGGGTGATAGAACTAGCTGGTTTATGCAT…
	PROTEIN	MQMGSSCLPPGFRFHPTDEELIGYYLSRKVEGLEIELEVIPVIDLYKFDPWELPDKSFLPNRDMEWFFFCPRDKKYPNGSRTNRATKAGYWKATGKDRKITCKSSGAITGYRKTLVFYEGRAPLGDRTSWFMHEYRLCDDDLSQKSPNLKGAFVLCRVVKKNGLKTKTLKTKNEQAIGSGCSSLATSPCRDETAQFQPFKPSLATNESSSIWISPDFILDSSKDYPQIQEASASEYFPNYNLPVNEASYQVGFPESSSYLNIDQENYEYNQTGHWPNYEYDQTGSFGCSNLF
BniB025157	CDS	ATGAAGGTTACTCGAGGTCCCACAAATATAGATCTCATCAACATCCTTCGTAGCAGAATCCAACATGACAAACGACCTAGTTTCATAGCCGAGATGCACAATTTGTACGAGAAAGAACCGTGGCTTATTCAGCACGTAAGGCACGTTAGTTCCGTCGAGAACTTGTGGTTTTACTTTGTCAGGAGGAAACAGCGTCCGGGGATTAAAAAATCTGACTCGAAGAGACCGAGCAGGAAGGTTGTTGGGTCAGGTAGATGGAAGACAACTGGTGTTTTGACTGAGAATAAAGATAGGGTTGGTTCTGTGAAGACTATAAGCTTCAAAGCCAATAGTGAAACGGTGAAAGATGGGATAACTACTGGCTGGGTGATGCATGAGTTTGTTTTGGATAAACCGGGA…
	PROTEIN	MKVTRGPTNIDLINILRSRIQHDKRPSFIAEMHNLYEKEPWLIQHVRHVSSVENLWFYFVRRKQRPGIKKSDSKRPSRKVVGSGRWKTTGVLTENKDRVGSVKTISFKANSETVKDGITTGWVMHEFVLDKPGFQELALCRIQFYPRKDNAQYAPRLTPIVIGLERQDGSKLVENNSQNHMTSIHHGAAAPVKIHQGQGMEQWSGSCSGEVVSNLALQHQNIMAQDSNYPIFNGGMKKHQDFRSYGQQKTPVPGHMEQYQGSGDRVEYQNQYLGQEMMDPKKVPMMVNQALNEYSGHLPSQQHQHFSLNGSKEQLQRLSSCGGLLGESSGQQQHHSLGRQATYLSLMEVQLSAQAMEEQQQQQQGNGYSALYSSKPYVQRMMDRQIFGSSALRMAQKNE…
BniB025429	CDS	ATGGATTACGAGGTATCAAGAACTGGTGATGAGATCATAGAAGATTCAGAGCAGATTGATCTGCTACCTGGCTTCAGATTTCACCCAACAGATGAAGAACTCATAAGCCACTACCTTAGACCGAAGGTTCTAAACACCCTCTTCTCCGCTATAGCCATTGGTGAAGTTGATCTCAACAAGGTTGAGCCTTGGGACTTGCCATGGAAGGCTAAGATTGGTGAAAAGGAGTGGTACTTCTTCTGCGTAAGAGATCGGAAATACCCAACCGGTTTAAGGACGAACCGGGCTACTAAGGCCGGTTACTGGAAAGCCACAGGGAAAGACAAAGAGATCTTCAAAGAAAAATCTCTTGTTGGTATGAAGAAAACATTGGTTTTCTACAAAGGAAGAGCTCCAAAG…
	PROTEIN	MDYEVSRTGDEIIEDSEQIDLLPGFRFHPTDEELISHYLRPKVLNTLFSAIAIGEVDLNKVEPWDLPWKAKIGEKEWYFFCVRDRKYPTGLRTNRATKAGYWKATGKDKEIFKEKSLVGMKKTLVFYKGRAPKGVKTNWVMHEYRLEGMYATDNLPKTAKNEWVISRVFQKGADGKKMHLYGLKMLGSGINQVEPAGLPPLVDSLAGSLSRVTCFSDQTTVEDKSHISEPKGECNIAMLGSSSTHLIPNIGSLIYSDPLFMQDNSSILKMLLDSEETQFKKDIQGFHTAENELTTSSWYGHGLAGSTGSVEVDCYWDF
BniB033340	CDS	ATGGCGGTTGTGGTGGAAGAAGGCGTGGTATTGAATCATGGAGGTGAGGAGCTTGTTGATATGCCACCTGGATTCAGGTTTCATCCAACAGACGAAGAGCTCATAACATGCTATCTCAAAGAGAAGGTTTTAGACAGCCGTTTTACGGCTGTGGCCATGGGAGAGGCCGATCTCAACAAGTGCGAGCCCTGGGATTTGCAAAAGAGGGCAAAGATGGGGGAGAAAGAGTTATATTTCTTCTGTCAAAGGGACAGGAAGTACCCCACCGGGTTGAGGACGAACCGTGCCACAGAATCCGGGTACTGGAAAGCCACCGGGAAGGATAAGGCGATCTTCAAAGGCAAAGGTTGTCTCGTTGGGATGAAGAAAACACTTGTATTTTATAGAGGAAGAGCTCCA…
	PROTEIN	MAVVVEEGVVLNHGGEELVDMPPGFRFHPTDEELITCYLKEKVLDSRFTAVAMGEADLNKCEPWDLQKRAKMGEKELYFFCQRDRKYPTGLRTNRATESGYWKATGKDKAIFKGKGCLVGMKKTLVFYRGRAPRGEKTNWVMHEYRLEGKYSYHNLPKSARDEWVVCRVFHKNNPATTTQKMTRIPLEDLTRMDSFDNIDHLLDFSSLPPLMDPSFTGQPEQNNFKSVNPPTYDIPSPIHPHHFNSSHQSIFSHHGFGSASGSGSSYNNNKDMIKMEHSLVSVSQETCLSSDVNAATTTEVSSVPAMKQEMSMMGMMNGSKSYDDLCDLRGILWDY
BniB036791	CDS	ATGGAATCAGTGGATCAGTCATGTAGTGTTCCTCCGGGATTCAGGTTCCATCCAACAGACGAAGAGCTCGTTGGTTACTATTTGAGGAAGAAAGTGGCATCACAAAAGATCGATCTTGATGTCATTAGAGATATTGACCTCTACAGAATCGAACCATGGGATTTACAAGAAAGATGCCGAATCGGATATGAAGAAAGAAATGAATGGTATTTCTTCAGCCACAAAGATAAGAAATATCCAACAGGAACAAGGACAAACAGAGCGACCATGGCTGGTTTTTGGAAGGCTACAGGTCGAGACAAGGCTGTCTATGACAAGTCAAAACTGATGGGCATGAGGAAAACACTTGTATTCTACAAAGGAAGAGCCCCTAATGGCCAAAAAACTGATTGGATCATG…
	PROTEIN	MESVDQSCSVPPGFRFHPTDEELVGYYLRKKVASQKIDLDVIRDIDLYRIEPWDLQERCRIGYEERNEWYFFSHKDKKYPTGTRTNRATMAGFWKATGRDKAVYDKSKLMGMRKTLVFYKGRAPNGQKTDWIMHEYRLESDENAPPQEEGWVVCRAFKKKPTTGQTKNTEAWRSGYFYDQLPSGVGSGMEPLNYVSISKQKQNIFAQDFMFKQELGGSDIGLKFIDCDQFIQLPQLESPSLPLMKRPVSSTSITSLEKNHNKYKRPLIEDDENFNELVRSKSKDKKKKASVMTTDWRTLDKFVASQLMSQEDGVSDFGAHQEVDNNKTGHCNNEESNNNGIEIPSSSLLSDREEENRFISGFLCTNLDYDLI
BniB038500	CDS	ATGTGGCGGCGTCAGTGGAAAGCGTCGACGGTGTTTCCAGGGTTCAAGTTCTCGCCTACGGACGTGGAGCTGATCTCGTATTACCTGAAGCGGAAGATGGACGGCTTGGAGAGGTCCGTTGAGGTTATACCGGAAACCGATATCTATAGTTTCGAGCCTTGGGATTTGCCCGATAAGTCGATAGTTAAATCGGATACCGAGTGGTTTTTTTTCTGTTCCCGTGGCAAAAAGTATGCACATGGTTCGCAGAACAGGAGAACAACCAAGATGGGATACTGGAAAGTCACTGGGAAAGAACGTGATGTCAAGTCTTCTTCTCAAGTGATTGGAACAAAGAGGACGCTTGTCTTCCAGATTGGTCGTGCACCGAAAGGCCAAAGAACAGAGTGGCTTATGCAC…
	PROTEIN	MWRRQWKASTVFPGFKFSPTDVELISYYLKRKMDGLERSVEVIPETDIYSFEPWDLPDKSIVKSDTEWFFFCSRGKKYAHGSQNRRTTKMGYWKVTGKERDVKSSSQVIGTKRTLVFQIGRAPKGQRTEWLMHEYCMKGGVFMDDALAVCRLRRNREFRTCTSQKAPPEPDLAADKHMILQNGAEWDNHLTETADNLQEETEEDFYGDILRDEIINLDEVVMRGKTPNEVPTLESASMAIRILPLPNTIGRQMASFLEERPSQEKKGKGGSVTESLSSCFFGIYSIKSDCQRWPLRRSGNEAKRTRVIILDTEGHASRGPSRLHRYSLPPENPHSVHRTTPELEASAHFQSRNTFDLMNDHYRIDPITVARSYPSSITASTHEKA
BniB044251	CDS	ATGAAGAACACATGTAACCTCATAGATTCAAAGCTCGAAGAACATCATTATCTTACCGGATCAAAGCAGTGTCCTGGATGTGGCCGCATGATTCAAGCTGCTACTAAACCAAACTGGTTTGGACTGCCGGCTGGAGTGAAATTCGATCCTACCGATCAAGAGCTTGTTGAGCATTTAGAAGCAAAAGTGAAGGGAAAAGAAGAAAATAAGAAATGGTTTCCGTCTCATCCACTTATAGATGAGTTCATCCCAACCATTGATGGAGAAGATGGGATCTGTTACACTCACCCACAGAAGCTTCCAGGGGTAACAAAAAATGGCTTAAGCAAACACTTCTTCCACAAACCATCAAGAGCTTACACAACCGGAACAAGAAAACGGCGCAAAATCATTCAAACG…
	PROTEIN	MKNTCNLIDSKLEEHHYLTGSKQCPGCGRMIQAATKPNWFGLPAGVKFDPTDQELVEHLEAKVKGKEENKKWFPSHPLIDEFIPTIDGEDGICYTHPQKLPGVTKNGLSKHFFHKPSRAYTTGTRKRRKIIQTDHQSELTGSPSETRWHKTGKTRPVMINGRQRGCKKILVLYTNFGKNRRPEKTNWVMHQYHLGINEEEREGELVVSKIFFQTQPRQCVGNINWSEHNVSSKDLIGIGAGDEICGVAAALQSLGSGDVDTRVNMNPFIRAFGEGTAEASKGRENRRVSGTCEEVHDGIIRPSSTSSHYMIHDHNHPHQIGDIGEFDIPSSSSYQHKPIFNTTSVVPFQQQQLRGRSSGSGLEDLIMGCTSTCTEEENSEAIPQQSADWLTFPPFW
BniB049004	CDS	ATGGACTTCGACCTCCCTGAGCTCCGTTCTTGCAATGTTGATCCTTGGGACTTGCTAGGAGATAAGAACACGGAAGTGTATTACTTTGTGAAGAAGGAAGAGCGAGAGAAGAAGGGAAGAGAGACGTTATCCGGTTACTGGGAAGAGTGTGATGATGAGGAAGTAATGGAGTCTGGAGATCGTGGTTGTAATTATTTAGAAGGAAGGAAAAGGACATTTGCTTTCTATATTGGGAAAAAACCTCGAGGAACAATAACTCCATGGATAATGTACGAGTTTCGGCTTCTTTCCTCTAGGGCTACAAAGAGGTCATCTTCCTCTCTGCCGCGGGGTGAGGTAGAGAACTGGAGGGCGGTGAAGGTGATCGTCAAGGAAGAGAATGATGAGGAGACCGAGGAG…
	PROTEIN	MDFDLPELRSCNVDPWDLLGDKNTEVYYFVKKEEREKKGRETLSGYWEECDDEEVMESGDRGCNYLEGRKRTFAFYIGKKPRGTITPWIMYEFRLLSSRATKRSSSSLPRGEVENWRAVKVIVKEENDEETEEDEQASDESDGEEVVQSR
BniB019048	CDS	ATGGCGGATTCGTGTTTAAAAGGTGGTAAATTCAGTGCACCAGGGTTTCGATTTCATCCGACCGATGAGGAGCTGGTCATGTATTATCTCAAGAGGAAGATTTGTAAGAGAAAGCTCAAAGTCAGTGCCATCGGCGTCGTCGATGTTTACAAGTTCGATCCCGAAGAATTGCCTGGTCAATCGGTGTTAAAGACGGGAGATCGACAGTGGTTCTACTTCACTCCAAGGAGCAGGAAGTATCCAAACGCAGCTAGGTCTGGTAGATGCACAACCACTGGGTATTGGAAAGCTACTGGAAAGGATCGAGTCATATCGTACAACTCGAGGTCAGTAGGACTCAAAAAGACTCTTGTTTTCTATAGAGGTCGTGCACCTACTGGTCAGCGAACTGATTGGGTG…
	PROTEIN	MADSCLKGGKFSAPGFRFHPTDEELVMYYLKRKICKRKLKVSAIGVVDVYKFDPEELPGQSVLKTGDRQWFYFTPRSRKYPNAARSGRCTTTGYWKATGKDRVISYNSRSVGLKKTLVFYRGRAPTGQRTDWVMHEYTMDEDELGRCKNAKEYYALYKLFKKSGAGPKNGEEYGAPFQEEEWADDEDGDDIAVPEEPVVRYEDTRRVDNVNLVNVQLDDLEEILSGIPYAPGVPQTCTSIPQVYREEELQSTLVNNYAREFLKPQEIGDFLPNDRPSSYESIDVTSAPNNSVMEPLVFEKEDYIEMDDLLTPELGASLVENPGEYGDFNDFDQLFHDISMSLDMEPIFADNTSDCEQQFLYQQFQDQTPENKLNKTMDPSPNLNQFTDDLWLEDDNQAV…
BniB005977	CDS	ATGGACATTCCACTTTACCGATACGACCACGGCGGAGACAGCCAATATCTTCCGCCAGGTTTCAGGTTTCATCCCACAGATGAAGAACTCATCACCCATTACCTCCTCCGAAAGGTTCTTGACGGTTGCTTCTCGAGCCGTGCCATTGCAGAGGTTGATCTGAACAAGTGCGAGCCTTGGCAACTTCCCGGGAAAGCTAAGATGGGAGAGAAAGAATGGTACTTTTTCAGCCTCCGTGACAGGAAGTATCCGACGGGACTGAGAACGAACAGAGCAACGGAGGCTGGTTACTGGAAAGCTACCGGAAAAGACCGAGAGATTTATAGTTCAAAGACTTCTGCACTTGTTGGGATGAAGAAGACTCTTGTCTTTTATAAAGGAAGAGCTCCTAAAGGAGAG…
	PROTEIN	MDIPLYRYDHGGDSQYLPPGFRFHPTDEELITHYLLRKVLDGCFSSRAIAEVDLNKCEPWQLPGKAKMGEKEWYFFSLRDRKYPTGLRTNRATEAGYWKATGKDREIYSSKTSALVGMKKTLVFYKGRAPKGEKTNWVMHEYRLEGKFSYHFISRSSKDEWVISRVFKKTGLANNTGASGGGASASVSSCTGGSKKTKVPSTISTNYSEQPSSPSSVSLPPLFDPITTLGYTDSCYSYNSRSTNTTLTATAITEHVSCFSTATTTTALGLDVNVDSFNHLLPPAPPGFDPFPRFVSRNFSPLSNIRSFNENSNHFPYFGSSSASTMTPSVNLPSSHGGTGMNYWLQTTAEENETKAGLLTGGLDCVWNY
BniB031360	CDS	ATGAGTTGGTGTGATGATTCAGATGATAACTACGATCCCAATCTTGAAAGAGCATCCAACATTGATCATCCATCAATTCAACTCAGAAACCAATCTCAATCATGTGTCACGAGAGGTCCAGATTCCAAGATTATCGTTGAAGCTCCCATCGTCATGACTTGTTCTTCTTGTGGACAAAAGATCCATCAACAAGACGAACAGGTTGGCAGTATCAAAGATTTACCAAGCTTACCGGCAGGAGTAAAATTCGACCCATCCGATAAGGAGATTCTTAAGCATTTGGAGGCAAAAGTATCATCCGATAAAAAAAAAATTCATCCATTGATCGATGAATTTATACCGACGCTTGAAGGAGAGAATGGAATTTGTTATACGCATCCTGAGAAACTTCCTGGAGTA…
	PROTEIN	MSWCDDSDDNYDPNLERASNIDHPSIQLRNQSQSCVTRGPDSKIIVEAPIVMTCSSCGQKIHQQDEQVGSIKDLPSLPAGVKFDPSDKEILKHLEAKVSSDKKKIHPLIDEFIPTLEGENGICYTHPEKLPGVSKDGQVRHFFHRPSKAYTTGTRKRRKVSTDEEGHETRWHKTGKTRPLLSQAGVAGFKKILVLYTNYGRQKKPEKTNWVMHQYHLGHSEDEKDGEPVLSKVFYQTQPRQCGGSTEPKPKSRVNLNRFSYENHAGFGYDHGGRNEESTQVIRELVVREGDGSCSFLSFTCDANKGKESFMKKL
BniB031443	CDS	ATGTATGAATACAATGACATGTATGAATACAACGACGAAGATGGAGGGATTCAATTTCAACCCTACGACGACGAACTCATCAACCAATATTTAATCCCCAAATTGGAAGGTAAACCGCGTGGAGAGATCACTATGAAGGATGTTTACTCAAAGGAGCCATGGCTGCTGGACCATCCCATGGGTTCGTTCTTCAAGAAGAACGAGTGGTACTACTTTGTGACAAGGACTCAACTCTCTAAGAAGAAAATTGGTTGTGGTAAGAAAGCGAAACGCATGATCACCCGAGACGACGATAGTGGGTCTTGGAAAGCTAATGCGAAAGGCGATATCACGGACAAGGAAACAAAGACGGTCATTGGTGAAAAGCAAACCTTAGCTTTTGTTAAAAACAAAGTAAAT…
	PROTEIN	MYEYNDMYEYNDEDGGIQFQPYDDELINQYLIPKLEGKPRGEITMKDVYSKEPWLLDHPMGSFFKKNEWYYFVTRTQLSKKKIGCGKKAKRMITRDDDSGSWKANAKGDITDKETKTVIGEKQTLAFVKNKVNNKKQKRGDGTSCDVLVPGSESSWIMTEYMLPEIEGKFHELVICKIHVIENSNKQKGHDDR
BniB004956	CDS	ATGGAGGAAAAGCCTGGTTTTGAATTCCGTCCGTACGACGAGGAGCTCGTGGGTTTCTATCTCCGTCACAAAATTCTCGGAAACGATAGTCTCGTCGGCGGAGTCATCAGAGAGATCAAAATCTGCAGCTTAGATCCTTGGGACTTGCACTGGATGAAGCTTATCTGCTTTGTTGCTGGTTTTATTTTTTTACAGAGGAGGACCTATGTCATCTGCAGATTGGAGTATAAGGGTGACGAAATGAACATTCTGTCGGCTAACCCAACAGATGCCATTCCAACTTTTGCTCCTACTATGGCCAATAGTGCAAGCTCTGTGGTCGACCAATCACTTCAAGGGAATTCTGGACATTACAACACTTTCTCCGAGTATGATTCAGCGTATCAGGGGCATCAGTTT…
	PROTEIN	MEEKPGFEFRPYDEELVGFYLRHKILGNDSLVGGVIREIKICSLDPWDLHWMKLICFVAGFIFLQRRTYVICRLEYKGDEMNILSANPTDAIPTFAPTMANSASSVVDQSLQGNSGHYNTFSEYDSAYQGHQFNGNFDTQQLLQYFNPTSEYDLANQSHWFTNPQQQHSATYQDDSDMWKQVVEENWPSLIGRDTWSSTDSVGSKDGPYHTPKDSTPSVSTVELLHHHEAQEQPKQLELQWQGKEKVINKQHSECEWKMAEDAFKKAPPTSAVKQSWIVLEEISQKNSRWIYLKNIIGLLLFIFIIGCIILVG
BniB005328	CDS	ATGGCGAGATCATATTTACCACCTGGTTTCAGATTTCACCCAACAGATGAAGAACTAGTGGGGTATTACCTGCACAGGAGAAACGAAGGGCTTGAAATTGAGCTCGAAATAATTCCATTAATGGATTTATACAAGTTTGATCCTTGGGAACTTCCTGAGAAATCCTTCTTGCCAAATCGAGATATGGAATGGTTTTTCTTCTGTCACCGAGACAGAAAATACCAGAACGGATCTCGAATAAACAGAGCAACTAAATCTGGTTACTGGAAAGCCACTGGTAAAGATAGAAAAATCGTTTGTCAGTCTTCTTCTTCCTCGTCTTCATCAATCAGTGGGTGTCGAAAAACCCTTGTTTTTTATTTGGGTCGAGCCCCTTTTGGTGGTAGAACAGAGTGGGCA…
	PROTEIN	MARSYLPPGFRFHPTDEELVGYYLHRRNEGLEIELEIIPLMDLYKFDPWELPEKSFLPNRDMEWFFFCHRDRKYQNGSRINRATKSGYWKATGKDRKIVCQSSSSSSSSISGCRKTLVFYLGRAPFGGRTEWAMHEYRLFDNDTSEGSLNFKGDFAICRVVKRNEVTLKKCETSSLEIPDEPLTNNVDIPCEARYIGKGSCDARDTLRASPDFILESSTKGNSQSQTEEDSGFQVFALPEFEYPPEFFADLTFEWVMENPFTFVNYQEAHADDEVINLGVLR
BniB017456	CDS	ATGGAAGAAAATCTTCCCCCGGGGTTTAGATTTCATCCTACAGACGAGGAGCTGATAACGCAGTATCTTTGTCGGAAAGTCTCCGATACTGGATTCACCGGTAAAGCTGTTGTCGACGTTGATCTCAACAAGTGTGAACCTTGGGATTTGCCAGCCAAGGCTTCAATGGGAGAGAAAGAGTGGTACTTCTTCAGCCTAAGAGACCGGAAATACCCAACCGGGTTAAGGACAAACCGAGCAACTGAAGCCGGTTATTGGAAAACCACAGGTAAAGATAAAGAGATATACCTAAGTGGAGTGCTGGTTGGGATGAAGAAAACCCTTGTTTTCTACAAAGGAAGAGCTCCAAAGGGTGAGAAAAGCAATTGGGTTATGCATGAGTATAGGCTTGAGAACAAA…
	PROTEIN	MEENLPPGFRFHPTDEELITQYLCRKVSDTGFTGKAVVDVDLNKCEPWDLPAKASMGEKEWYFFSLRDRKYPTGLRTNRATEAGYWKTTGKDKEIYLSGVLVGMKKTLVFYKGRAPKGEKSNWVMHEYRLENKQPFKPAKEEWVVCRVFEKSTAAKKPQEQQPQSSFGSPCDANSSMANEFEDIELQNMNTNSSTIDYSHIHQFSQNGLYSQDNAISTAGLNMNMATNIPSWSTTSLLGQPLSPINSLLLKAFQIRNSYSFTNTNPSTLHQQGVSNNTMQNGSSSSQPQPPEEAFNMDSIW
BniB024746	CDS	ATGGCGAGTGCTTGGATTGTAGATGGCCCAGGAATCGCTTCCAAAGTGAAGAATGCTTCTCTCTCTTCACCTTTGCAGACCAGAGACTGTGGAGCTTCTATCCAGTGCCCCAACTGCTGTTTCCGCATTGACAACACCAATGTGCTCGTTCCATGGCCTGGCCTTCCTAAAGGTGTTAAGTTCGAGCCAACTGATGCTGACATCATCGAGTTCTTGGAAGCTAAATGTGGGATTGGTGGCTCAGAACCACACGTGCTCATCGAGGAGTTCATTCGGCCAGTCACTGAAGATGTTGGAATCAATTACACTCACCCTGAAAACCTTCCTGGTGCAAACAAAGATGGAGTAGGTGCCTTCTTCTATCACACGACTGTGCAAGCATACGGAACAGGACAAAGG…
	PROTEIN	MASAWIVDGPGIASKVKNASLSSPLQTRDCGASIQCPNCCFRIDNTNVLVPWPGLPKGVKFEPTDADIIEFLEAKCGIGGSEPHVLIEEFIRPVTEDVGINYTHPENLPGANKDGVGAFFYHTTVQAYGTGQRKRRKITPTCLNEEPVRWHKTGKTKHVLLNGVERGCKKIMVLYKSAINGAKPEKTNWVLHQYHLGTEGNERGEYVVSKITYQKEKVKDEGESSGVRGGPTTPMTNTPPPPRPVDEKAFDDDKMFDPFFEGLESIPEAALWSKKARIEEDVAVNLSEDNLTCNESIEASSLWENQILPNPGLGELDGFALSDLENVDLGTPPDFLTLASQDSLMNWMGWL
BniB024817	CDS	ATGGATTACGAGGTATCTAGAACCGGGCAGATAGTAGAAGATTCAGAGCAGATTGATTTACCACCTGGCTTCAGATTTCACCCAACAGATGAAGAGCTCATAAGCTGCTACCTGAGACCAAAGGTTCTAAACACCTTCTTCTCTGCTGTAGCCATTGGTGAAGTTGATCTCAACAAGGTCGAGCCATGGGACTTGCCATGGAAGGCTAAGATTGGTGAAAAAGAGTGGTACTTCTTCTGCGTAAGAGATCTGAAATACCCGACCGGTTTAAGAACGAACCGGGCTACCAAGGCTGGTTATTGGAAAGCTACAGGCAAAGACAAAGAGATATTCAAAGAAAAATCTCTTGTTGGTATGAAGAAAACTTTGGTTTTCTACAAAGGAAGAGCTCCTAAAGGT…
	PROTEIN	MDYEVSRTGQIVEDSEQIDLPPGFRFHPTDEELISCYLRPKVLNTFFSAVAIGEVDLNKVEPWDLPWKAKIGEKEWYFFCVRDLKYPTGLRTNRATKAGYWKATGKDKEIFKEKSLVGMKKTLVFYKGRAPKGVKTNWVMHQYRLEGEYAIDNLPKTAKNEWVISRVFQKQADGKKMHISSLMKLGSGINQFKPVGLPPLMDSSPYLKSGGGDTFAGSLSHVTCFSDQTTEDKSHFSVSKDECNFTMFGSSSTHLIPNVGSLLHSDPMFSQDNSSILKMLLDSEETQFKKHLQDFSTSENELTASSWHSHNLSGSTAPVEVDCFWNF
BniB031193	CDS	ATGCCGCCGATGAGTTTGCCTCCAGGTTTCAGGTTTCTTCCAACAGACGAAGAGCTAGTGGCATACTATCTGGACAGGAAGGTCAACGGCCGAACCATTGAGCTTGAGATCATCCCCGAAGTTGATCTCTATAAATGCGAGCCATGGGATTTGCCTGAGAAGTCATTTTTGCCGGGGAACGACATGGAATGGTACTTTTACAGCACAAGTGATAAAAAGTATCCAAATGGGTCTAGGACAAACCGTGCGACCCGAGCGGGTTACTGGAAAGCAACAGGGAAAGACCGTGTAGCAGAATCAAAGAAGATGATGGGGATGAAGAAGACGCTAGTTTATTACCGAGGAAGGGCTCCTCATGGCCTTCGTACTAATTGGGTGATGCATGAATATTGTCTCACT…
	PROTEIN	MPPMSLPPGFRFLPTDEELVAYYLDRKVNGRTIELEIIPEVDLYKCEPWDLPEKSFLPGNDMEWYFYSTSDKKYPNGSRTNRATRAGYWKATGKDRVAESKKMMGMKKTLVYYRGRAPHGLRTNWVMHEYCLTYPSSSSSIQF
BniB031203	CDS	ATGGAGTCGGAGGAGGAGAAGGAAAGTAGTATAAGCACGGTGGAGGCAAAGTTGCCCCCAGGATTCAGGTTTCACCCAAAGGACGACGAGCTTGTCTGCGATTACTTGATGGCACGATCGCTTGGTCACAATATAAATCAAACTCCTCCTCCTCTCCTCTTAATCCAAGTCGATCTCAACAAGTGCGAGCCTTGGGACATCCCCAAAACGGCATGCGTGGGAGGCAAAGATTGGTATTTCTACAGCCAAAGAGATAGGAAATACGCGACGGGGCTGAGAACAAACAGAGCAACGGCGACCGGTTATTGGAAAGCCACAGGGAAAGACAGAGCCATTCTAAGAAAGAGTAAGCTTGTCGGGATGAGGAAGACATTGGTGTTCTATCAAGGTCGAGCTCCC…
	PROTEIN	MESEEEKESSISTVEAKLPPGFRFHPKDDELVCDYLMARSLGHNINQTPPPLLLIQVDLNKCEPWDIPKTACVGGKDWYFYSQRDRKYATGLRTNRATATGYWKATGKDRAILRKSKLVGMRKTLVFYQGRAPRGRKTDWVMHEFRLQGSFDPPTLNSPEVQEDWVLCRVFHKNTEGVLSRDNMGSCFDETASAPLPPLMDSYINFDQEPSSYLGDDQHFITNEQVPCFSNLSQNQTLTNSVSELKTPCKNPIPLFTGGSVPTTLPGLDSFCSSDQMVLRALLSQLTKIDGGIEVKESQSYGEGSSESLLTGIGIPSTAWN
BniB034809	CDS	ATGGAAGAAAATCTTCCTCCAGGGTTCAGATTTCATCCTACAGACGAAGAGCTCATAACACATTATCTTTGTCGGAAAGTCTCCGATGTTGGATTCACTGCTAAAGCTGTCGTCGACGTTGATCTCAACAAGTGTGAACCTTGGGATTTGCCAGACAAGGCTTCAATGGGAGAGAAAGAGTGGTACTTCTTCAGCCTACGAGACCGGAAATACCCAACCGGGTTAAGGACAAACCGAGCAACTGAAGCTGGTTATTGGAAAACCACCGGTAAAGATAAAGAGATATACCGAAGTGGAGTACTGGTAGGGATGAAGAAAACCCTAGTTTTCTACAAAGGAAGAGCCCCAAAGGGTGAGAAAAGCAATTGGGTTATGCATGAGTATAGGCTTGAGAACAAA…
	PROTEIN	MEENLPPGFRFHPTDEELITHYLCRKVSDVGFTAKAVVDVDLNKCEPWDLPDKASMGEKEWYFFSLRDRKYPTGLRTNRATEAGYWKTTGKDKEIYRSGVLVGMKKTLVFYKGRAPKGEKSNWVMHEYRLENKQPFKPAKEEWVVCRVFQKSATTKKPQEQQPQSSYGSPCDANSSMANEFEDIELPSLNSNSLTVDYNHIHQQYSQNNVYSDNITSTAGLNMNMATNLPAWTTSLLGPPLSPINSLLLKAFQIRNSYNINPSLLQQGVSNVMQDGSSSSQQQPKEEAFNMDSLW
BniB035085	CDS	ATGGGTCGCGAATCTGTGGTTGCTGCTGTGTCTTCTCCACCGACGGCGACTGCGCCGAGTACTGTCGTGGCGGCGACGGCGCTTGCTCCTGGGTTTCGATTTCATCCCACTGACGAGGAGCTAGTGAGCTATTACTTGAAGAGAAAGGTTCTGGGGAAACCTGTGCGCTTCGATGCGATTGGGGATGTTGATATCTACAAGCATGAGCCCTGGGACTTAGCAGTGTTTTCGAGGTTGAGGACAAGGGACCAGGAATGGTACTTCTACAGCGCGTTGGATAAGAAGTACGGTAACGGTGCTAGGATGAACCGAGCAACTAACAAAGGCTACTGGAAAGCAACTGGTAAAGACAGAGAGATCCGCAGAGATGTTCAGATTCTCGGTATGAAAAAGACGCTC…
	PROTEIN	MGRESVVAAVSSPPTATAPSTVVAATALAPGFRFHPTDEELVSYYLKRKVLGKPVRFDAIGDVDIYKHEPWDLAVFSRLRTRDQEWYFYSALDKKYGNGARMNRATNKGYWKATGKDREIRRDVQILGMKKTLVFHSGRAPDGLRTNWVMHEYRLVDYETESNGNLVQDAYVLCRVFHKNNIGPPSGNRYAPFMEEEWADDGVALIPGVDVSVRAEQLPLANGNNQMDQDIRLASKDVININEPPRETTPIDIELNHHENALKPQENKHYDEEEEALKREDADEDERPSPLCILNKEAPLPFLQYKRRRQNEPNNNNSSKTTQDHCSSTTTTVDNTPTLISSSTIAAATNTAISALLEFSLMGISDKNENPPQPLTPLPPPEAKLNVLQKEIHQMSVER…
BniB035086	CDS	ATGGCTGCTGAGTCCTCGCCGCCGTCTGCGATTGCTCCGGGTACTGCTGTCTCGGCGACTTCCCTTGCTCCTGGGTTTCGATTTCATCCCACTGACGAGGAGCTGGTGAGCTATTACTTGAAGAGGAAGGTTCTGGGTAAACCCGTGCGGTTCGATGCGATTGGGGAGGTTGATATCTACAAGCATGAGCCTTGGGACTTAGCAGTGTTTTCGAGGTTGAAGACAAGGGACCAGGAATGGTACTTCTACAGCGCGTTAGACAAGAAGTACGGTAACGGCGCTAGAATGAACCGAGCTACTAACAAAGGCTACTGGAAAGCAACTGGTAAAGACAGAGAGATCCGCCGTGATGTTCAGATCCTCGGTATGAAAAAGACACTCGTTTTCCACAGCGGTCGT…
	PROTEIN	MAAESSPPSAIAPGTAVSATSLAPGFRFHPTDEELVSYYLKRKVLGKPVRFDAIGEVDIYKHEPWDLAVFSRLKTRDQEWYFYSALDKKYGNGARMNRATNKGYWKATGKDREIRRDVQILGMKKTLVFHSGRAPDGLRTNWVMHEYRLVDYETESNGNLVQDAYVLCRVFHKNNIGPPSGNRYAPFMEEEWSDDGVAMIPGVDVSVRAEPLPQANGNNHMGQESKDLININEPPRETTQMDIELNHQENNNNNRDDEVEEALKREQTEEDERPPPTPSVCVLNKEAPLPLLQYKRRRQNESTRTTQEHCSSTTTTVDNTPTLVPSSTAAATNTAISALLEFSLMGISDKKENPPQPPRKEASPPPATLSSPEEKLNDLQKEVHQMSVERETFKLEMMS…
BniB035087	CDS	ATGGGTCGTCGTGGTGGTAGCTCCTCAGAGACATCGCTCGCTCCCGGTTTCCGATTCCATCCAACGGACGAAGAGCTCGTCCGTTACTACCTAAAACGCAAGATCTGCAACAAACCCTTCAAGTTCGACGCGATCTCCGTCACCCACGTGTACAAATCCGAGCCGTGGGATCTCCCTTCTCAGTCGAAGCTGAAGAGCAGAGACTTGGAGTGGTACTTCTTCAGCGTGCTCGACAACAAATACTCGAACGGGTCCAAGACGAACCGCGCGACGGAGAAGGGGTACTGGAAGACGACGGGGAAGGATCGGGAGATTCGTAATGGGTCGAGAGGAGGAGTCGTTGGGATGAAGAAGACGCTTGTTTATCATAGAGGTCGTGCTCCTCGTGGTGAGAGGAGT…
	PROTEIN	MGRRGGSSSETSLAPGFRFHPTDEELVRYYLKRKICNKPFKFDAISVTHVYKSEPWDLPSQSKLKSRDLEWYFFSVLDNKYSNGSKTNRATEKGYWKTTGKDREIRNGSRGGVVGMKKTLVYHRGRAPRGERSNWVMHEYRLVDDEIVKAGGVQKDAYVVCKIFQKSGSGPKNGEQYGAPFVEEEWEEEDGMTFVPDQDPGSLEDQVYVDIDGIDQKPDNLVVHDAIPIHLGFDQGECSNNVETNYSDSRNYVQPGNYVHDNFEPPVEEQKHIIHDGNLPNEENGSGVQEESRANLTSSDNIFDADSLLYNDFPVEGNYFTGEEFMDPNGSLLQNDGLYLETDDLNNTQEDGFNFEDYLTFFDEDDQNLTFDPSQLMGTEDAIPDQEELFQMAETEAAS…
BniB035144	CDS	ATGGAGGAGGCGATGGGATCATGGGACACAAGAAGGGAAGAACAAGAAGAAGAAGAAGAGAAACAAGTGTTAAAACTTCCAGGGTTTAGGTTTCATCCGACAGATGAAGAGCTTGTAGGATTCTATCTCTCCAAGAAAGTACTCCTCAAGAAATCCAGCAAGATAGATGAGATCATCAGCCAAATTGATATCTATAAATTCGATCCGTGGGATATTCCTCGCTCGAGGAGTACGGAGAAGGAGAGCTACTTCTTCTGCAGGAGAGGTAGGAAGTACAGAAATAGCATAAGACCGAACCGAGTGACTGGTTCCGGTTTTTGGAAAGCCACAGGAATCGATAAACCTGTCTATTCCGATGGATCCAGCAAAGCCGTGATCGGTCTAAAGAAGACACTCGTT…
	PROTEIN	MEEAMGSWDTRREEQEEEEEKQVLKLPGFRFHPTDEELVGFYLSKKVLLKKSSKIDEIISQIDIYKFDPWDIPRSRSTEKESYFFCRRGRKYRNSIRPNRVTGSGFWKATGIDKPVYSDGSSKAVIGLKKTLVYYLGSAGKGSKTDWMMHEFRLPTANDTIPGGSTLLNPTPSLLHAEVWTLCRIFKRNVSSRKYTPDWRELAGGRRMKPQKSKYQEAYISFGDNESSSSTNNINVMERKDNYERNVFQLQQTPHHHQPIPVDTTITTQVDNTVPHFSNDNIHDITYENWDELRSVVEFAFGPSSFS
BniB035207	CDS	ATGGATGTCTTTAGTGGTTGGGAGAGATCAGGATATGAAGACGAAACCATAATGCCACCTGGGTTTAGGTTTCATCCAACTGATGAAGAGCTCATCAATTACTACCTCCTCAAGAAGGTCCTTGACTCCAGTTTCACTTGTGCTGCTATATCTCAAGTTGATCTCAACAAGTCTGAGCCTTGGGAGCTTCCCGAGAAAGCGAAACTAGGGGAGAAAGAGTGGTACTTCTTCACACAAAGAGATCGTAAGTACCCGACGGGACTGAGAACGAACAGAGCAACAGAAGCTGGTTACTGGAAAGCAACCGGTAAAGACAGAGAGATCAAAAGCTCGAAGACAAAGTCGCTTCTCGGGATGAAGAAAACGCTCGTCTTTTACAAAGGCAGAGCTCCTAAAGGT…
	PROTEIN	MDVFSGWERSGYEDETIMPPGFRFHPTDEELINYYLLKKVLDSSFTCAAISQVDLNKSEPWELPEKAKLGEKEWYFFTQRDRKYPTGLRTNRATEAGYWKATGKDREIKSSKTKSLLGMKKTLVFYKGRAPKGEKSCWVMYEYRLDGKFSYHYITSSAKDEWVLSKVCLKSNVVGRETKLVSSGVNVSSSTGSVIAPIIDAFATEHVSCFSNTSAAAHADSSFPPKYLPAPPTSLPRQPRRIGDDDDDVAFGQFMGLGSSGLFNVDDAAFSPNLLSLPPTVLPPPLYGGSALSFWPFAM
BniB035220	CDS	ATGGGTATCCAAGAACTGGGTCCGTTAGCCCAACTAAGCTTACCACCGGGTTTCCGGTTTTACCCGACGGACGAAGAGCTGATGGTTGAATATCTATGCAGAAAAGCTGCCGGTCACGATTTTTCTCTCCAGCTCATCGCCGAGATCGATCTCTATAAGTTCGACCCGTGGGTCTTACCGATTAAGGCGTTATTCGGAGAAAAAGAATGGTATTTCTTCAGCCCGAGGGATAGGAAGTATCCTAACGGGTCGAGACCTAACCGGGTTGCTGGGTCGGGTTACTGGAAAGCCACCGGTACAGATAAGGTTATATCGACGGAGGGAAGAAGAGTTGGGATCAAGAAAGCTTTGGTGTTTTACGTCGGAAAAGCACCAAAAGGCACCAAAACTAATTGGATC…
	PROTEIN	MGIQELGPLAQLSLPPGFRFYPTDEELMVEYLCRKAAGHDFSLQLIAEIDLYKFDPWVLPIKALFGEKEWYFFSPRDRKYPNGSRPNRVAGSGYWKATGTDKVISTEGRRVGIKKALVFYVGKAPKGTKTNWIMHEYRLIESSRRYGSTKLDDWVLCRIYKKQSSAEKQVYSNLMTRGREYSNNDDSSTSSSSHRYNDVLESLHEIDNRSLGLVAGSTNAPPHHSHRPSLTEQKTGFLNLDTEPSFDWPSYGVHNSVPELTPSHIVPSLRYGDGGGYFQSVKDE
BniB035221	CDS	ATGGAGAGTACAGATTCTTCCGGTGGTCCTCCGCCGCCGCAGCCTAACCTCCCTCCAGGATTCCGTTTTCATCCGACCGATGAAGAGCTCGTCGTTCACTACCTCAAACGCAAAGCCGCCTCCGCTCCTTTACCTGTCTCCATCATCGCTGACGTCGATCTCTACAAGTTCGATCCATGGGAACTTCCTGCTAAGGCGTCGTTTGGAGAGCAGGAATGGTACTTCTTCAGTCCTAGAGATCGGAAGTATCCGAACGGAGCGAGACCAAACAGAGCGGCCACGTCTGGTTATTGGAAAGCCACGGGTACTGACAAACCGGTGCTTGCCTCAGACGGGAACCAAAAGGTCGGCGTGAAGAAGGCACTCGTCTTCTATAGTGGCAAACCTCCAAAAGGTGTT…
	PROTEIN	MESTDSSGGPPPPQPNLPPGFRFHPTDEELVVHYLKRKAASAPLPVSIIADVDLYKFDPWELPAKASFGEQEWYFFSPRDRKYPNGARPNRAATSGYWKATGTDKPVLASDGNQKVGVKKALVFYSGKPPKGVKSDWIMHEYRLIDNKPNNRPPGCDYGNKKNSLRLDDWVLCRIYKKNNAGRHVDNDKDHDMIDYIFRKIPSGLNHNVSRSMNFFPGRFPGGYGMFSDGDPSLYDGSGMMCSNGADAVNLNVCNGNLSSEAVGNGLNPASSSGPMMMMANLKRALPVPYWPAAEEEQDDSPSKRFHGVGGGVDCSNMSSSMVEEPPPLMQQQGGVLGDGLFRTTSSYQLPGLNWYSS
BniB035298	CDS	ATGGCTCCTGTCGGATTACCTCCAGGCTTCAGATTTCATCCAACGGACGAAGAACTCGTAAACTATTATCTTAAAAGAAAGATTAATGGTCAAGAAATCGAGCTAGATATAATACCTGAGGTTGATCTCTACAAATGTGAGCCATGGGACCTCGCAGAGAAGTCGTATCTACCAAGTAGAGATCCAGAATGGTATTTTTTCGGGCCACGTGACCGGAAGTATCCGAATGGGTTTAGGACGAACCGAGCAACGAGAGGCGGATATTGGAAATCGACTGGGAAAGATAGGAGAGTGACGAGTCAAAGCAGAGCGATTGGAATGAAGAAAACTTTGGTTTACTATAGAGGAAGAGCTCCTCAAGGGATCCGTACGGACTGGGTTATGCATGAGTATCGTCTC…
	PROTEIN	MAPVGLPPGFRFHPTDEELVNYYLKRKINGQEIELDIIPEVDLYKCEPWDLAEKSYLPSRDPEWYFFGPRDRKYPNGFRTNRATRGGYWKSTGKDRRVTSQSRAIGMKKTLVYYRGRAPQGIRTDWVMHEYRLDDKDCDPSSLQDSYALCRVFKKNGICSELETEQQLQTGQCSFTTASMEISSCNNNINYNNDYETLSPEVGGSSACVEDVADDKDDSWMQFITDDVWVTSSNAAAMGHGQAVYIDY
BniB036210	CDS	ATGATGGGATCAAGGGACAACAGAAGGGGAGAACAAGAAGAAGAGGAGGAACAAAAGTTAAAGCTTCCAGGGTTTAGGTTTCATCCTACCGATGAGGAGCTTGTAGGGTTTTATCTCTCTAAGAAAGTACTTCTCAAGAAACCCAACAAGATCGATGAGATCATCAGCCATATAGATATTTATAAATTTGATCCATGGGATCTTCCCCGGTTAAGGAACACGGAGAAGGAGAGCTACTTCTTCTGCAAGAGAGGAAGGAAGTACAGAAACAGTACAAGACCGAACCGAGTGACTGGTTCTGGTTTCTGGAAAGCGACAGGAATCGACAAGCCTGTATACTCAGATGGATCCAGCAAAGCCGTGATCGGTTTAAAGAAGACACTCGTTTATTACATCGGA…
	PROTEIN	MMGSRDNRRGEQEEEEEQKLKLPGFRFHPTDEELVGFYLSKKVLLKKPNKIDEIISHIDIYKFDPWDLPRLRNTEKESYFFCKRGRKYRNSTRPNRVTGSGFWKATGIDKPVYSDGSSKAVIGLKKTLVYYIGSAGKGSKTDWMMHEFRLPTANDTITGGSTHLNPTPPSLLDAEVWTMCRIFKRNVSSRKYTPDWRELSGVKCVKPQQSKYQEAYISFGDNESTISTNNINIMESKGNYERNVFQLYQTPHQHQPILMDTASTTQVDNMGPHFSNADVHNTTYVNWDELRSVVEFAFGPSLS
BniB036211	CDS	ATGGATGTTAAAGAAGAGAACAAGGGCAGCATAAGTATGGTTGAGGCTAACTTGCCTCCTGGGTTTAGATTCCACCCGAGAGACGACGAGCTTGTCTGCGACTACTTAATGAAAAGAACCGTTCGCAGCCTCTATCAACCAGTTGTTTTGATCGAGGTTGATCTCAACAAGTGCGAGCCTTGGGACATTCCTCAAACGGCGAGAGTGGGATGTAAAGAATGGTATTTTTACAGCCAAAAAGATCGAAAATACGCAACGGGACAAAGGACAAACCGGGCTACGGCCACAGGTTACTGGAAAGCCACCGGTAAAGATAGATCAATCCACAGAAATAGTAGTCTTGTGGGCATGAGAAAGACACTTGTATTTTACAAAGGTCGAGCCCCTAAAGGTCGTAAA…
	PROTEIN	MDVKEENKGSISMVEANLPPGFRFHPRDDELVCDYLMKRTVRSLYQPVVLIEVDLNKCEPWDIPQTARVGCKEWYFYSQKDRKYATGQRTNRATATGYWKATGKDRSIHRNSSLVGMRKTLVFYKGRAPKGRKTDWVMHEFRLHGTFLHHPPNSLKEEWVLCRVFHKNTNEVNRDNNMRSCSNGTASALMDSYINFDHQHIISQQVPCFSNLSQNQTSQSGFVSKNPNPLSSHSSDQMVLRALLSQLTKSGKESKSYGEGSSESHLTDVGIPSHDAWKY
BniB036281	CDS	ATGGATATGGATGTTTTTAATGGTTGGGAGAGATCGAGATACGAAGATGAAACCATAATGCCACCTGGGTTTAGGTTTCATCCTACTGATGAAGAGCTCATCACGTACTACCTCCTCAAGAAGGTCCTTGACTCCAGTTTCTCCTGTGCCGCCATTTCTCAAGTTGATCTCAACAAGTCTGAGCCTTGGGAGCTTCCCGAGAAAGCGAAGATGGGGGAGAAAGAGTGGTACTTCTTCACGCTAAGAGACCGGAAGTACCCAACGGGACTGAGGACGAACAGAGCAACAGAAGCTGGTTACTGGAAAGCTACCGGTAAAGACAGAGAGATCAAAAGCTCAAAGACAAACGCTCTCCTCGGGATGAAGAAAACGCTCGTCTTTTACAAAGGCAGAGCTCCT…
	PROTEIN	MDMDVFNGWERSRYEDETIMPPGFRFHPTDEELITYYLLKKVLDSSFSCAAISQVDLNKSEPWELPEKAKMGEKEWYFFTLRDRKYPTGLRTNRATEAGYWKATGKDREIKSSKTNALLGMKKTLVFYKGRAPKGEKSCWVMHEYRLDGKFSYHYITSSAKDEWVLSKVCLKSSVVSRETKLISSSGGVNCSSFAGSMIAPIIDNASFATEHVSCFSNTSAAHATDASFPTYLPTPTPPSLPRQPRRFGDDVAFGRFMDVGASSGQFGIDAAFLPNLPSLPPTVFTPPSQSFGMYGGSAVGSWPFAL
BniB036292	CDS	ATGGAGAGTATCGATTCTTCAGGTGGTCCTCCGCCGCCGCAACCTGACCTTCCTCCAGGATTTCGTTTTCACCCTACCGACGAAGAGCTCGTGGTTCACTACCTCAAACGCAAAGTGGCCTCCGCTCCTTTACCTGTCGCCATCATCGCTGAAGTTGATCTCTACAAGTTCGATCCATGGGAACTTCCTGAAAAAGCTTCGTTTGGAGATAAGGAGTGGTATTTCTTCAGCCCTAGAGACCGGAAGTATCCAAACGGAGCGAGGCCGAACAGAGCTGCCACGTCGGGATACTGGAAGGCGACGGGGACTGATAAGCCGGTGCTAGCCTCCGACGGGAAGCAGAAGGTGGGCGTGAAGAAGGCACTCGTCTTCTACAGTGGGAAACCTCCAAAAGGTGTT…
	PROTEIN	MESIDSSGGPPPPQPDLPPGFRFHPTDEELVVHYLKRKVASAPLPVAIIAEVDLYKFDPWELPEKASFGDKEWYFFSPRDRKYPNGARPNRAATSGYWKATGTDKPVLASDGKQKVGVKKALVFYSGKPPKGVKSDWIMHEYRLIDNKSNNRPPGCDFGNKKNSLRLDDWVLCRIYKKNSGGRYVHNDKDNDMTDYIFRKIPPSLSTGLNHNVSRSMSLYDGDHGLYYGSGMICNNVSSGNPNATNVFIGNGLNPASSSGPMMMANLKRPLPVPYWPVAEAEQDVSPSKRFHGVRGGGEDCSNVSSSMMEEHPPLIQQLGGVSGDDGLFRTTSYQSPGLNWYSS
BniB040493	CDS	ATGGCTCCTGTCTCGTTACCTCCAGGTTTCAGATTTCATCCAACTGACGAGGAGCTAATTACTTACTATCTCAAAAGAAAAATCAACGGTCTAGAAATCGAACTTGAGGTTATCGCTGAAGTTGATCTCTACAAGTGCGAGCCATGGGACTTACCAGGGAAAGCCTTGCTTCCAAGCAAAGACCAAGAATGGTACTTCTTCAGTCCACGGGACCGTAAGTATCCCAACGGTTCAAGGACAAACCGCGCAACCAAAGGTGGGTACTGGAAGGCCACGGGTAAAGACCGCCGGGTTAGTTGGAGAGACCGAGCCATTGGAACAAAGAAGACATTGGTTTACTACCGTGGACGCGCGCCTCATGGTATAAGAACCGGTTGGGTCATGCATGAATATCGACTC…
	PROTEIN	MAPVSLPPGFRFHPTDEELITYYLKRKINGLEIELEVIAEVDLYKCEPWDLPGKALLPSKDQEWYFFSPRDRKYPNGSRTNRATKGGYWKATGKDRRVSWRDRAIGTKKTLVYYRGRAPHGIRTGWVMHEYRLDETQCEPSAYGMQDAYALCRVFKKIVIEAKPRDQHRSYVHAMSNVSGNSSFDACSDLEISSTTHQVQNAFQPRFGNGRFNSNAMISNEDWSQYYGSSYAPFPTPYKVNNEIECSMLQHNMSLPPLRVENSAVSDCDFFTTMTHNNNHGVLEDFTFATSSSNHYNSAGDQAIHIANYDEPPLMMSNHHMNQGYTEEQKIISSLDDNNQDLGFQGDNTNDNINIDDFFSFDIYNEENVNQVEGNEADVNTNETLDSSGFEVVEEETRF…
BniB040774	CDS	ATGTCTCCTGTCTCGTTACCCCCAGGTTTCAGATTTCATCCAACCGATGAGGAGCTAATCACTTACTATCTTAAAAGAAAAATTAACGGTCTAGAAATCGAACTTGAGGTTATCGCTGAAGTTGATCTCTACAAGTGCGAGCCATGGGACTTACCAGGGAAGTCCTTGCTTCCTAGCAAAGACCAAGAATGGTACTTCTTCAGCCCACGAGACCGGAAGTATCCTAACGGTTCCAGGACAAACCGAGCAACTAAGGGCGGGTATTGGAAGGCCACGGGTAAAGACCGCCGAGTCAGCTGGAGAGACCGAGCCATTGGAACCAAGAAGACATTGGTTTACTACCGTGGACGTGCGCCACATGGTATTAGAACCGGTTGGGTCATGCATGAATATCGACTC…
	PROTEIN	MSPVSLPPGFRFHPTDEELITYYLKRKINGLEIELEVIAEVDLYKCEPWDLPGKSLLPSKDQEWYFFSPRDRKYPNGSRTNRATKGGYWKATGKDRRVSWRDRAIGTKKTLVYYRGRAPHGIRTGWVMHEYRLDEKECEPSAYGMQDAYALCRVFKKIVIESKPRDQHRSYIHAMSNVSGNSSFDACSDVEISSTTYQVQNAFQPQFGKGRFNSNASNENWSQYYGSSYLPSPTPYKVNSEIECSMFQHNISLPPLRVENTAVNDYDFYNTSMTHSNNHGV
BniB041121	CDS	ATGGCGTCTTCTTCTAAGCGTTCGTGGTCGTTGTCGTCTCTGCCACGCGAGATAACACAAGAAATATTCTACAGGACTCCGGTGGAATCTCTGGTCCGATCAAAACCGACGTGCAAGGAATGGTACGCTCTCCTCACCGACAAAACTTTCATCTACGAACACTTGCGTCGCTCTCATCAAGAAGAACGATTCTTAAGAATCTTTGGTGATATGGTACAAACCATGGACCCAGTGACCAGAACACGCTCAGTTTCACCGATCCCAAGCGAGTTTCGACCTCCGTACGAGATTGACACCATGGTTCACTGCGATGGACTCATGTTGTGTAAGTGTGCCGACTCGATGAAACAAAGATTCATCGCACTTTGGAACCCCGTCACCAGGAAAACCAGATTGGTC…
	PROTEIN	MASSSKRSWSLSSLPREITQEIFYRTPVESLVRSKPTCKEWYALLTDKTFIYEHLRRSHQEERFLRIFGDMVQTMDPVTRTRSVSPIPSEFRPPYEIDTMVHCDGLMLCKCADSMKQRFIALWNPVTRKTRLVEPAEILTSSDYYGIGYNSKKKTRDDGYKIVRFTCGLFEFEGYEIYEFETGSWRSIGGKADVDVKVTCKCVSVLGNMYWVAYREETPEEDFIRCFDFSDETFKHICFCPTSYVNSHLASFNGDSLSLLQQDQATRNIEVWVSSKLGDGDGDVSFSKYFSLSGPDLPALRVNLNAARPVYCFVKPTSVIVWCVGVELGEGDKRDFRTNPSNKVPSFASMGRESVSAVSTPPTATAVATALAPGFRFHPTDDELVSYYLKRKVLGKPVR…
BniB041122	CDS	ATGAGTCGCGATTCTGTGGCTTTTGAGTCCTCGCCGAGTACGGCGGTGGCGGCGACGGCGCTTGCTCCCGGGTTCCGATTCCATCCGACAGACGAGGAACTCGTGAGTTATTACTTGAAACGAAAGGTTCTCGGTAAACCCGTACGGTTCGATGCGATTGGGGATGCGGATATCTACAAGCACGAGCCTTGGGACTTAGCAGTGTTTTCGAGGTTGAAGACAAGGGACCAGGAATGGTACTTCTACTGCGCGTTAGACAAGAAGTACGGCAACGGCGCTAGGATGAACCGATCCACCAACATAGGCTACTGGAAAGCCACCGGTAAAGACAGAGAAATCCGCCGTGACGTTCAGCTGCTCGGTATGAAAAAGACGCTCGTTTTCCACAGCGGGCGTGCC…
	PROTEIN	MSRDSVAFESSPSTAVAATALAPGFRFHPTDEELVSYYLKRKVLGKPVRFDAIGDADIYKHEPWDLAVFSRLKTRDQEWYFYCALDKKYGNGARMNRSTNIGYWKATGKDREIRRDVQLLGMKKTLVFHSGRAPDGLRTNWVMHEYRLVDYETESNGNLVQDAYVLVKVFHKNNIGPPSGNRYAPFLEEEWADDGVALIPGVDVKVRAEPLPVGNGNNQMDQETQSESKGLININEPPREATPMDIEVNHHEDTLKPQENDNINHDEGEKALKREDVEEDQGPPASGVLNKEAPLPLLQYKRRRQNESNNNNSRRTTQDHWSSTATTLISPSAAAATSTAISALLEFSLMGISEKKENTIASTPLPSPEEKLNDLHKEIHEMSVERETFKLEMMSAEAM…
BniB044379	CDS	ATGGAGGAGATCCGGTCTGCCAAGTACGCGTATGGCGCCAAAGACGATCATTGCACAACAAATGACGAGAAAATAATGTCAATTTATCTGCAAAGTATGAACGATTACGGAGATTCATGGCCTGATCACTTCTTCGGAGACACAGACTTGTTCACCATGAATCCAAGCGAGGTATTCGATTCTGAGAACCCTATTTTCGTCTTCGTTTACCCTATAACGGAAGCCTGTGGTAGAACCGATGGAAGCGGCTCCGGTGGATGGAGGATCATCGGTCAAGATAAACTGATCAAAGACGAGGAAACAGGGAAGATTCTAGGGTTCAAGAAGATCCTCAAGTTCTGCTGCGGAGGAACGAAAGCGAGAGGCTACAAGAGAACTTGGGTGATGGAGCAGTACAGG…
	PROTEIN	MEEIRSAKYAYGAKDDHCTTNDEKIMSIYLQSMNDYGDSWPDHFFGDTDLFTMNPSEVFDSENPIFVFVYPITEACGRTDGSGSGGWRIIGQDKLIKDEETGKILGFKKILKFCCGGTKARGYKRTWVMEQYRLPSKWNPKQDHVVCKIQLLFQTEISSLLAKHFSYSSSDPFPAAQSLPAYGVCLANPQDDGAYHLQTIFDSGGNEWPSYVTNDVYHLHPSTFVDHKDKRFLESGLCVFANRTEACGYTDECESGWRVLEEDNAIYSVSHEVMGYRRVFKFCEEDEDRFFDIVNGVLLTWIMEEYRLAEEAMKDKVLCVIKLCRTVSVYSLLIGSTILLHSRSAELLNLPHHRDMSSIGEEQDESPPDSPVCDGGRGIDGSDVDVGLLRQVKKLKTSE…
BniB044485	CDS	ATGGAGGAGATCCGGGCTGCCAAGTACGCGGATACCGACGACGATCCCAGCAAAGCAAATGACGTGAAAATAATGTCAACTTATCTGCAATGCGTGAAGGACAACGGAGATTCATGGCCTGAACACTTCATCGAAGACGCAGACGTGTTCACCAAGAAACCAAACGAGGTATTCGATTCCGAGAACCCTATCTTCGTTTTCGGTTACCCTCGTACAGAAGCCTGTGGTAGAACCGATGGATGCGACTCTGGTGGTGGATGGAGGATCATCGGTCAAGATAAACTGATCAAAGACGAGGAAACAGGGAAGATTCTAGGGTTCAAGAAGATCCTCAAGTTCTGCTGCGGAGGAACAAAAGCGAGAGGTTACAAGAGAACTTGGGTGATGGAGAAGTACAGG…
	PROTEIN	MEEIRAAKYADTDDDPSKANDVKIMSTYLQCVKDNGDSWPEHFIEDADVFTKKPNEVFDSENPIFVFGYPRTEACGRTDGCDSGGGWRIIGQDKLIKDEETGKILGFKKILKFCCGGTKARGYKRTWVMEKYRLPSKWNPKQDHVVCKIQLLFQTEISSLLSKHFSYSSSPDPFPAAQSLPAYGVCLANPQDDGAYHLQTIFDSGGNEWPSYVTNDVYCVHPSTLVDREDKRFKESGLCVFANRTEACGYTDGCESGRWRIMEEDDAIYSMSREVMGYKRVFKFYEEDKGGYFDIVDGEEVLRTWTMEEYRLVEEAMKDKVLCVIKRLGGKQH
BniB044547	CDS	ATGGAAGATCACTCTGTAACATCTCAAGAAGACGTAGAAGATTACTCTATAATATCTCAAGAAGACATGGAAGATTACTCTATAATATCTCAAGAAGACATGGAAGATTACTCTATAGTATCTCAAGAAGACATGGAAGATCACTCTATAGTAGACAACAAAATCAAACCAGAAGACGAGATCATAATCGCCTACTATCTGAACATGATGATTAACAACCGCAAATCCTGGCCTAGCCACTTCATCCGTGACGAAGAAGCAAACGTGTACAACCTGAACCCATGGAAACTCTTCAATACTCACAACCCTAACTACTTATTGTTCGTCAAACGCCGGACAGAGGCTTGTGGTAAGACCGACGGAAGTGACTCTGGTTGCTGGAGGATCATGGCCCGTGAT…
	PROTEIN	MEDHSVTSQEDVEDYSIISQEDMEDYSIISQEDMEDYSIVSQEDMEDHSIVDNKIKPEDEIIIAYYLNMMINNRKSWPSHFIRDEEANVYNLNPWKLFNTHNPNYLLFVKRRTEACGKTDGSDSGCWRIMARDKLIKTEETGTILGFKKILKFCEKEKKQSEEEEEQRVWVMEEYRLVDRWKHDQVICKIRLLLQPEVSSLLAKHFSFLPKWIIPFSRKDFKPRWDLCAPTIPTDEIISYYLKMCVDDRNDWPSHFLQSEQVYGVVPWKIVDADQSSAELQEGPYFFVNRTERSGRTDGCDGGCWRIMRRDRVIVSKRNKVLGFKRVFKFCVRGKAEPVYKFWGDEKYEVNECKVTWVMDEYRLAKKKNQGKVICRISLLFPTPLEIHVRHF
BniB044548	CDS	ATGATAAGCAAGGATCCAAGATCAAGTTTACCACCAGGGTTTCGATTCCATCCAACTGATGAAGAACTCATCCTCCATTACTTGAGGAAGAAGGTTTCTTCTTTGCCAGTCCCGCTTTCAATCATCGCAGATGTCGATATCTATAAGTCTGATCCATGGGATTTACCAGCTAAGGCTCCGTTTGGAGAGAAAGAATGGTACTTTTTCAGTCCAAGGGACAGGAAGTATCCTAATGGAGCAAGACCAAACAGAGCGGCTGCGTCTGGATATTGGAAAGCTACGGGAACGGATAAATTAATCGCGGTACCAAACCGTGAAGGGTTTAATGAAAACATTGGTATAAAAAAGGCTCTTGTGTTTTACACAGGAAAGCCACCAAAAGGTGTTAAAACCAATTGG…
	PROTEIN	MISKDPRSSLPPGFRFHPTDEELILHYLRKKVSSLPVPLSIIADVDIYKSDPWDLPAKAPFGEKEWYFFSPRDRKYPNGARPNRAAASGYWKATGTDKLIAVPNREGFNENIGIKKALVFYTGKPPKGVKTNWIMHEYRLAESLSPKRVAHARNSSQVNNLGDMNLKSKEYSMRLDDWVLCRIYKKSHASLSSAEVASATSEDQEHEENDNEPFVVSETLLANDQTLKRQKSSFSNLLDATDFTFLTNFLNETPENRTESDFSFMFGDFSNPDIYGNSYLDHKLPKLSSPTSETRVIGNKRERVDYSEEMINTSKKMINNFSYNNSMDHLDHSMVQQSSFLNQEFLMSPHLQYQG
BniB045768	CDS	ATGGTGGAAGAAGGAGGTGTAGTTGTGAACCAAGGAAGGGACCAAGATGTGGTGGATTTGCCTCCAGGGTTTCGGTTTCATCCAACTGATGAGGAGATCATAACTCACTACCTCAAAGAGAAAGTCTTCAACGTCCGATTCACCTCGGCTGCAATTGGTCAAGCCGACCTTAACAAGAACGAGCCATGGGATCTACCAAAAATTGCAAAGATGGGGGAGAAGGAGTTTTACTTCTTTTGCCAAAGGGATCGGAAGTATCCCACCGGTATGAGGACGAACCGTGCAACCGTGTCCGGTTATTGGAAGGCGACCGGGAAGGACAAGGAGATCGTTAGAGGCAAAGGTTGTCTTGTTGGGATGAAGAAAACACTTGTGTTCTATAGAGGAAGAGCTCCAAAA…
	PROTEIN	MVEEGGVVVNQGRDQDVVDLPPGFRFHPTDEEIITHYLKEKVFNVRFTSAAIGQADLNKNEPWDLPKIAKMGEKEFYFFCQRDRKYPTGMRTNRATVSGYWKATGKDKEIVRGKGCLVGMKKTLVFYRGRAPKGEKTNWVMHEYRLDGIYSYHNLPKSARDEWVVCRVFHKNAPSPTTIATPTNQLTRIDSLDNIDHLLDFSSLPPLIDPGFLSQPGPSFSGAGQQHDFKPIPHNPTTVQINNTYPSAQTLNYPYHSVPNYGFGSGYGTGLGNKNNGMIKLEHSLVSVSQETGLSSDVNTTATPEISSSYPVMGNPAANAAMVDGNNTSYDDDDLGIFWDDY
BniB045828	CDS	ATGGAAGTTCTATCGCTTGACTCACTGCCGGTGGGATTCAGATTCAGTCCGACGGACGAGGAGTTAGTCCGTTACTATCTCCGTCAAAAGATCAACGGCCGTGACGAAGAAGTCAGAGTGATCCGTGAAGTCGATATCTGCAAGTATGAGCCTTGGGATTTGCCTGATCTTTCTGTGGTGAGGACAACAGACTCGGAGTGGCTCTACTTCTGTCCGTTGGACCGGAAGTATCCGAGTGGAAGTAGGATGAATCGAGCCACTGTTGCTGGATACTGGAAGGCCACTGGTAAAGACCGGAAGGTCAAATCAGGGAGCACTAAGATTATAGGTGTTAAGAGGACTCTTGTCTTCTACACTGGTCGTGCTCCTAAGGGGACACGAACCAGTTGGATTATGCAT…
	PROTEIN	MEVLSLDSLPVGFRFSPTDEELVRYYLRQKINGRDEEVRVIREVDICKYEPWDLPDLSVVRTTDSEWLYFCPLDRKYPSGSRMNRATVAGYWKATGKDRKVKSGSTKIIGVKRTLVFYTGRAPKGTRTSWIMHEYRATEKDLDGTKPGQNPFVVCKLFKKGDVVTEASPECEVEPAVSSPTVVDEMRSEVEVSDVSLAFPTKEEPKHSDVAESSLVVSGECQSDISAPEVTTTELDHIDWSSYLEFESLDHTMFSPLHSQVQSELGSAFDGFQYGSTEPFRNQNDAHIQTQYGSNDPDQYMLDLLDSTFQIPYDLPEMKHLAQPEQILYEPQSLVNTSNKINNDVSDTGIKIRTRRAQAPPCADQFVMQGNASRRLRLQVNNNSPKPEADSPQLQSIKK…
BniB045881	CDS	ATGGAGAGTCTGTCACACATTCCTCCCGGCTATCGATTCCATCCGACTGATGAAGAACTCGTAGACTATTATCTTAAGAATAAAGTTGCATTACCTGGAATGCAAGTTGATGTTATCAAAGATGTTGATCTCTACAAAATCGAGCCATGGGACATCCAAGAGTTATGCGGAAGAGGGGCAGGAGAAGAGAGGGAATGGTATTTTTTTAGCTACAAGGACAAGAAATATCCAACGGGGACACGAACCAATAGAGCAACGGGCTCGGGATTTTGGAAAGCAACAGGTCGGGACAAGACCATATACTCGAAACAAGAGCTTGTAGGAATGAGGAAGACTCTAGTGTTTTACAAAGGCCGGGCCCCAAATGGTCAAAAGTCAGATTGGATAATGCATGAATAT…
	PROTEIN	MESLSHIPPGYRFHPTDEELVDYYLKNKVALPGMQVDVIKDVDLYKIEPWDIQELCGRGAGEEREWYFFSYKDKKYPTGTRTNRATGSGFWKATGRDKTIYSKQELVGMRKTLVFYKGRAPNGQKSDWIMHEYRLETDENGPPHEEGWVVCRAFKKKLTTMNYNNSRTMMGSSSSGQESNWFAQQMDVANGNYYHLPDLESPIMFQGASLSSLHDNDNDPYGVVLSTINATPTTLVQRDDEGDHGQKKERGCKNMAYAAMKPTKAGLEEPLEQIHKIRITLSSKNVKNLEKVCADLVRGAKDKRLRTKGPVRMPTKVLKITTRKAPCGEGTNTWDRFELRVHKRVIDLFSSPDVVKQITSITIEPGVEVEVTIADS
BniB047130	CDS	ATGAATCTACCACCGGGATTCAGATTTTTTCCAACGGACGAAGAGCTCGTCGTCCACTTCCTCCACCGCAGAGCTTCACTCTTGCCTTGTCATCCTGACGTCATCCCTGACCTCGAACTTTACCCTTACGATCCTTGGGACCTTCCTGGGAAAGCTTTGGGAGAAGGGAGGCAATGGTACTTCTATAGTAGAAAGACACAAGAAAGAGTGACAAGCAATGGGTATTGGGAATCAATGGGCATAGACGAGCCCGTCTTCACAAGCTCTACACACAAGAAAGTGGGCATCAAAAAGTATCTGACTTTCTATCTAGGGGATTCTCAGACTAACTGGGTCATGCAAGAATACTCCCTCCCTGATGCATCTTCTTCATCTGGTCGATCTTCTAAGAGATCAAGC…
	PROTEIN	MNLPPGFRFFPTDEELVVHFLHRRASLLPCHPDVIPDLELYPYDPWDLPGKALGEGRQWYFYSRKTQERVTSNGYWESMGIDEPVFTSSTHKKVGIKKYLTFYLGDSQTNWVMQEYSLPDASSSSGRSSKRSSRGSTSSGRKPDYSKWVICRVYEQNGSEEEDDDGAELSCLDEVFLSLDDLDEVSLP
BniB032323	CDS	ATGGCGGAGGTTACTAGGGATACATCGGTGTCTGCAGTGGCGGTTTCGACGGCGTTTCCTGGTTTCAAATTCTCTCCGACGGACATCGAGCTTATTTCGTATTATTTGAAACGGAAGATGGATGGCTTGGAGAGGTCCGTCGAGATTATCCCTGAGCTCGATATTTACAACTTCGAGCCTTGGGACTTGCCTGATAAATCGGTCGTTAAATCTGAGAGTGAATGGTTCTTCTTCTGTGCTCGTGGTAAGAAGTATCCACACGGTTCACAGAACAGAAGAGCAACCACGATGGGATACTGGAAAGCCACAGGGAAAGAACGTAACGTCAAGTCTGGTTCTGAGGTTATTGGTACAAAGAGGACGCTTGTCTTCCACATTGGTCGTGCTCCTAAAGGTGGA…
	PROTEIN	MAEVTRDTSVSAVAVSTAFPGFKFSPTDIELISYYLKRKMDGLERSVEIIPELDIYNFEPWDLPDKSVVKSESEWFFFCARGKKYPHGSQNRRATTMGYWKATGKERNVKSGSEVIGTKRTLVFHIGRAPKGGRTEWIMHEYCMLGISLDALVICRLRRNTEFQGATTTRKPPPPQPSLNTNMQSETVSENISGWENNVVDYYLSGESGHELLSEITESSQSSHNPQVPGEEDFYADILRDDIVKLDDPADSGGNTLIDVPRLQSESTTTRVLPLPSMVDKQMQSLLQRLPLQNDIGEENNISMSSCFIGIYSIKSINRARWDVVAWVLVMIAVLVFYLV
BniB003279	CDS	ATGAATAATGAAACACCAAGAATCTCGCTTGCGCGTTTCAGTCCCACACGTGTTGAGCTCGTCAACATCCTTCGCAAGCGAATCGATAGAGGGGAACGTTCTAGTCTCATAACCGACAATCATATTCTGTACGAGACAGCACCGTGGCTTATTCGACACGTAAGACATGGTACCTTCTATGAGAACGAGTGGTATTACTTTGTCACGAGGAAACAACCTCCGGCGATAACCAGAAAACCTGGCTCGTGGAGACCGTGCCGTAAGGTGGGTGAGGCAGGGAGATGGAAGACAACTGGTTTGACTACGGTTGTCGACAAAAATGGAGTTAGGGTCGGCTCTCTGAACTATGCAAGCTTCAAAACCAATGGTGCAACACAAAGACATGGGAAATCGACTGGT…
	PROTEIN	MNNETPRISLARFSPTRVELVNILRKRIDRGERSSLITDNHILYETAPWLIRHVRHGTFYENEWYYFVTRKQPPAITRKPGSWRPCRKVGEAGRWKTTGLTTVVDKNGVRVGSLNYASFKTNGATQRHGKSTGWAMHEYVLDRPGFQELVLCRIRFRPGQDNAQYAPRLSPIMIGQSQQPPVETHRDPVTDQWTAFWSDEAGLPDPESSYPIWDGGMEQRQNIGSYDQQQDHILGHMGQNGQGFGDLVDNPIQYLRQETMDRLQIPMMMNQALNEEQQWNGYSGPSLAHQYLGQDMVPMTQHFAAQHQHFSVDEHHGLDSSVQIFGESSGQQQNHILGTQALMEDPSHLAPAREDEEHQEFGYSSLFLAQNNQYLRQNNDLLAPGELTAQQQLLGQDSN…
BniB004699	CDS	ATGGAGACCTTTTGTGGGTTTCAGAAGGAAGATGAGCAGATCGATCTACCTCCTGGGTTTAGGTTTCATCCAACAGATGAAGAACTCATAAGTCAGTATCTCCATAAGAAGGTTCTTGACATCAGCTTCTCAGCTAAAGCTATTGGTGAAGTTGACTTAAACAAGTCTGAGCCATGGGAGTTACCATGGATGGCAAAAATGGGTGAGAAAGAATGGTACTTCTTCTGTGTGAGGGACAAAAAATATCCAACCGGTTTGAGGACTAACCGGGCTACTGAAGCCGGTTATTGGAAGGCGACAGGGAAAGATAAGGAGATTTACCGAGGTAAATCACTTGTTGGGATGAAGAAGACACTTGTATTCTATAGAGGAAGAGCTCCTAAAGGTCAGAAAACCAAT…
	PROTEIN	METFCGFQKEDEQIDLPPGFRFHPTDEELISQYLHKKVLDISFSAKAIGEVDLNKSEPWELPWMAKMGEKEWYFFCVRDKKYPTGLRTNRATEAGYWKATGKDKEIYRGKSLVGMKKTLVFYRGRAPKGQKTNWVMHEYRLEGKLSAHNLPKTAKNEWVICRVFQKTAGGKKIPISSLIQIGSLGTDFSPSLLPSLTDKTKTEPVYVPCFSNQAAQVQGSTLNSFSSPIFNSIQADISHRLPLYQSLMLAQERSVQLATIDNNTRQSLEAMSVSQETAVSIDMNTDTSSDFEYGKRRLNAQADPSYSTGLVDPEPFWNY
BniB009756	CDS	ATGAGCTGGTGTGATGGTTCAGATGAAAACTACGACCTCAATCTTGAAAGAGCATCCAACATTGATCATCCATCGATTCAACAAAAAGACCAATCTCAATCATGTGTCACGAGCCGTCCAGATTCAAAGATTATCGTTGAATCTCCCATCATGACTTGTTCTTCTTGTGGACATAAGATGCATCAACCCGACGACCAGGTTGGCAGCATCAAAGATTTACCAAGTTTACCGGCAGGAGTCAAATTCGACCCCTCGGATAAAGAGATCCTTATGCACTTGGAGGCGAAGGTTTCATCCGATAAGCGGAAGCTTCATCCGTTGATCGATGAGTTTATACCGACACTCGAAGGAGAGAATGGAATTTGTTATACGCATCCTGAGAAACTTCCTGGAGTGAGC…
	PROTEIN	MSWCDGSDENYDLNLERASNIDHPSIQQKDQSQSCVTSRPDSKIIVESPIMTCSSCGHKMHQPDDQVGSIKDLPSLPAGVKFDPSDKEILMHLEAKVSSDKRKLHPLIDEFIPTLEGENGICYTHPEKLPGVSKDGQVRHFFHRPSKAYTTGTRKRRKVSTDEEGHETRWHKTGKTRPVLSQTGEAGFKKILVLYTNYGRQKKPEKTNWVMHQYHLGHSEDEKDGEPVLSKVFYQTQPRQCGGSTETKPKNLVNLNRFNYENLQAGFGYEHGGKSEETTQVIRELVVREGDGSCSFLSFTCDASKGKESFMKNQ
BniB009785	CDS	ATGAATTCATTTTCTCACGTTCCCCCGGGTTTTAGATTTCACCCAACAGACGAAGAACTTGTAGACTACTACCTAAGAAAAAAAGTTGCATCAAACAGAATAGAAATCGATTTCATAAAGGACATTGATCTTTATAAGATTGAGCCATGGGATCTTCAAGAGTTGTGTAAAATTGGACATGAAGAGCAGAGTGATTGGTACTTCTTTAGCCATAAAGACAAGAAGTATCCCACAGGGACTCGAACCAATAGAGCAACAAAAGTAGGGTTTTGGAAAGCCACTGGAAGAGATAAGGCTATATATTTGAGGCATAGTCTTATTGGAATGAGGAAAACACTTGTTTTTTACAAGGGAAGAGCCCCAAATGGACAAAAATCCGATTGGATCATGCATGAATAC…
	PROTEIN	MNSFSHVPPGFRFHPTDEELVDYYLRKKVASNRIEIDFIKDIDLYKIEPWDLQELCKIGHEEQSDWYFFSHKDKKYPTGTRTNRATKVGFWKATGRDKAIYLRHSLIGMRKTLVFYKGRAPNGQKSDWIMHEYRLETDENGTSQEEGWVVCRVFKKRLAAVRRMGDYDSSPSHWYGDQLSFMASELETNGPRRILPNHQQQHQYEHQQQLPYGLNASTYTLKNPNLLCKQELELQYNHLVQQHDLLHESSLSLIHLPQLKIPNIQQDNSHSNSLTYGTSNNDNKSSHIANLQQSNLAHEEQLNQGNQSLSSLYMNGGNEQGMDQITDWRVLDKFVASQLSNEEAATASVSLQNNAKDTSNVEYQVNEEEDQKRVSDMGEEYAASTSSSCQIDLWK
BniB011001	CDS	ATGTCAAAAGAGATTGAGCTTCCAGGTTTCAGATTCCACCCAACCGAGGAGGAGCTTCTTGATTTCTACCTCAGGAACATGGTTTACGGAAAATTTTCCAAAGTCGAAGTCATTGGTTTTCTCAACATCTATCGTCATGATCCATGGGACTTACCACGTTTATCGAAAATCGGAGAGAGGGAATGGTATTTCTTTGTTCCAAGGGAAAGGAAGCATGGGAACGGAGGGAGACCAAGCAGGACAACTGAGAAAGGATACTGGAAAGCAACTGGTTCCGATCGTAAAATCATAAGCTTGTCTGAACCAAAACGTGTGATTGGTCTCAAGAAGACCCTTGTGTTCTACAGAGGAAGAGCACCAGGAGGAAGCAAGACTGATTGGGTCATGAACGAGTACCGT…
	PROTEIN	MSKEIELPGFRFHPTEEELLDFYLRNMVYGKFSKVEVIGFLNIYRHDPWDLPRLSKIGEREWYFFVPRERKHGNGGRPSRTTEKGYWKATGSDRKIISLSEPKRVIGLKKTLVFYRGRAPGGSKTDWVMNEYRMPDNCTLPKDVVLCKIYRKATSLKVLEQRAEMEAKMNQTCPNSPLSSSETISFDGKEEDLMMNSFPFPQPSAMQEANNNFMLQGHTENAKNEEKQRETEMKESSSSLKLPCGVLPLPELQLPKQGLEWGQDQFLSISPWLQNLTPIVNLLNF
BniB011117	CDS	ATGGGGGATTCGACCATAGGGCCCGGTCATCCGCATCTCCCTCCCGGGTTTCGGTTTCACCCGACAGACGAAGAACTTGTAGTTCATTACCTCAAGAAGAAAGCTGCTTCAATTCCACTTCCGGTCTCAATCATCGCCGAGATTGATCTTTACAAGTTTGATCCTTGGGAGCTTCCAAGCAAGGCAAGTTTTGGAGAACAAGAGTGGTACTTCTTTAGTCCTAGAGATCGGAAGTATCCCAATGGCGTTAGGCCTAATCGGGCAGCAACTTCCGGTTACTGGAAAGCCACGGGAACCGATAAACCAATATTTACGTGCAATAGTCACAAGGTTGGGGTCAAGAAAGCGCTTGTGTTCTATGGTGGAAAACCTCCTAAAGGGATTAAAACTGATTGGATC…
	PROTEIN	MGDSTIGPGHPHLPPGFRFHPTDEELVVHYLKKKAASIPLPVSIIAEIDLYKFDPWELPSKASFGEQEWYFFSPRDRKYPNGVRPNRAATSGYWKATGTDKPIFTCNSHKVGVKKALVFYGGKPPKGIKTDWIMHEYRLTDGNLNTPAKPPESTTTRKNSLRLDDWVLCRIYKKNSSQRPTMERVLLREDLMEGMLSKSSANSSSTSVLDNNNNNNNNEEHFFDGMAVSSDKRSLCGQYRIGHEASGSSSFGSFLSSKRFHHTSDINNDNYNVSFVSMLSEIPQSSGFHGNGVIDTTSTLADHGVLRQAFQLPNMNWHP
BniB027173	CDS	ATGAATTCCTTTTCAAATGTTCCTCCTGGCTTCAGATTTCATCCAACCGATGAAGAACTTGTAGACTACTACCTAAGGAAAAAGGTTGCATCAAAGAGAATAGAAATCGATTTCATCAAAGACGTTGATCTCTACAAGATTGAGCCATGGGATCTTCAAGAGTTATGCAAAATAGGAAATGAAGAGCAAAGTGAATGGTACTTCTTTAGCCATAAAGACAAGAAGTATCCCACGGGAACTCGAACCAATAGAGCGACAAAAGCAGGATTCTGGAAAGCCACTGGAAGAGACAAGTCTATATATTTAAGACATGGTCTTATCGGTATGAGGAAGACACTCGTGTTTTACAAAGGAAGAGCCCCAAATGGACAGAAATCGGATTGGATCATGCACGAGTAT…
	PROTEIN	MNSFSNVPPGFRFHPTDEELVDYYLRKKVASKRIEIDFIKDVDLYKIEPWDLQELCKIGNEEQSEWYFFSHKDKKYPTGTRTNRATKAGFWKATGRDKSIYLRHGLIGMRKTLVFYKGRAPNGQKSDWIMHEYRLETNENGTPQEEGWVVCRVFMKRLAATMRKMGDYDSSPSHWYDDQLSFMASELDSNPQNRTLHNHHLYNRHHHQQALPYGLDASSAYTLNNNPNLQCKQELELLYNHMVQYQEKNNPFDDSMFIQLPQLESPNSNCNSLPYGSSNNGNNTRNIGNLQQSSNLTHEEHMQQGGQSLRSVCYDQGDQASTDWRVLDKFVASQLSSEDVAAAASASTSTHQNNNKIDARNTDYQVHEGMNMLENDSERVVDLGEEHANAHAGINSSSC…
BniB028875	CDS	ATGGCAGTCGTATCATCCACAACAAGCATCATCACCATGATGAGTAACCAAGTCAACAACAACACTGAAAAAGGTATAGAAGAAAATGCTCACAGAGGCGGCCACGAAAGTCGTATTCAAAATGATGATGAAGCTGATGATAATGATCAGGACATGGTCATGCCTGGATTCAGATTCCATCCCACGGAAGAAGAACTCATAGAGTTTTATCTTCGCCGTAAAGTTGAAGGCAAGCGTTTCAATGTAGAGCTGATCACTTTCCTCGATCTTTATCGCTATGATCCTTGGGAGCTTCCGGCTATGGCGGCTATAGGAGAGAAAGAGTGGTACTTCTATGTGCCAAGAGATAGAAAGTATAGAAATGGAGATAGACCAAACCGAGTAACGACTTCTGGGTAT…
	PROTEIN	MAVVSSTTSIITMMSNQVNNNTEKGIEENAHRGGHESRIQNDDEADDNDQDMVMPGFRFHPTEEELIEFYLRRKVEGKRFNVELITFLDLYRYDPWELPAMAAIGEKEWYFYVPRDRKYRNGDRPNRVTTSGYWKATGADRMIRSETYRPIGLKKTLVFYSGKAPKGTRSGWIMNEYRLPHHDTEKYQKAETSLCRVYKRPGVEDHPSLPRSTSTRLHNHDSSSRLAARQQQQHLPSSSNHSDNNLINNNNLDKLSTEYSGDGSTITTTNSNSDVTIALANQNIYRPMPYGASNTPIISNQEDDETAIVDDLQRLVNYQISDGGSNINHQYYQIAQQFHNQQQLNANANALQLVTAATTATLTPQTQAALAMNMIPAGTIPNNALWEMWNPLVPDGNKD…
BniB029360	CDS	ATGGGAAGTTCATGCTTACCTCCAGGGTTCCGTTTTCATCCTACTGATGAAGAACTCATCGACTATTACTTGAAAAGAAAAATCGAAGGTCTCGAGATCGAACTTGAAGTCATTCCTGTTATTGATCTTTATAAATTTGATCCTTGGGAGTTACCAGACAAGTCTTTTCTTCCAAACCGGGACATGGAATGGTTCTTCTTCTGTTCAAGGGACAAAAAATATCCGAATGGTTTTCGTACAAATCGAGGAACAAAGGCCGGTTATTGGAAAGCAACCGGAAAAGACCGGAAAATTACTTGTCGTTCATCTTCTACAATCGGCTATAGAAAAACCCTAGTTTTCTATAAAGGTCGTGCCCCGCTAGGCGATAGAACCACTTGGATCATGCATGAGTATCGA…
	PROTEIN	MGSSCLPPGFRFHPTDEELIDYYLKRKIEGLEIELEVIPVIDLYKFDPWELPDKSFLPNRDMEWFFFCSRDKKYPNGFRTNRGTKAGYWKATGKDRKITCRSSSTIGYRKTLVFYKGRAPLGDRTTWIMHEYRLCDDESSSQGSQHYYKGAFVLCRVAKKNEIKTSSKIRGSLSEQTLGSGESSGYSSRVTSPSRDGTMPFHTFVNPVSTETDSSNIWISPDFILDSSKDYPQIHDLTSEYFQDFAFPVIGQEVDFPASTLHTNVDGNMDESMKTGYWTNYGYDQTGLFGYSELS
BniB029481	CDS	ATGATGAATAATCGGGTGGGATATAGGTTTAGTCCTACGAATGAGGAACTAATAAACTTTTATCTGAAGAACAAAATTCTGGGGCTCGTTGACGATTCGATCAGCGAGGTCGACATCTACAGCTTCGACCCAAAGCTTCTGCCTCCGTTATCAAAGATCTACTCGAATGATCGTGTATGGTACTTCTTCTATCCGAATGAATCCACGAAGCAGAGGAGGAGGAGGTCTACACCGACTGGGTTTTGGAAACCTACTGGTCAAGATCGGACAATCCAGGATAAGGGAGGAAAAGGCTATGTGATCGGGATTTTGAAGACGTTGGTGTACCATGAAGGAAAGAGTCCCCATGGAGTTTGGACTCCTTGGGTTATGCACGAGTATCATATCACTTGCTTGCCT…
	PROTEIN	MMNNRVGYRFSPTNEELINFYLKNKILGLVDDSISEVDIYSFDPKLLPPLSKIYSNDRVWYFFYPNESTKQRRRRSTPTGFWKPTGQDRTIQDKGGKGYVIGILKTLVYHEGKSPHGVWTPWVMHEYHITCLPPSQRTYVICKIIYKGEDFRSGCSEVGIIPSGGNEVGNVSTGGNEVGNFSSAGSVVGNFPSCGNISSDLCHSSVSDLNSTRATTVTELDKHQQCLPSVQRLVDDTVRAANFAKMYKLLQNLPSVEIQGKLNSNAAP
BniB034068	CDS	ATGACCATGAGTAACCAAGTCAACAACAACAGTGAAAAAGGTATAGAAGAAGATGCACATAGAGGGGGACACGAGAATCATGCCCAAAATGATAATGAAGCTGATGATCATGATCATGACATGGTCATGCCTGGATTCCGGTTCCATCCCACCGAAGAAGAACTCATAGAATTTTATCTTCGCCGAAAAGTCGAAGGCAAACGTTTCAATGTAGAACTCATCATATTCCTCGATCTTTATCGCTTTGATCCTTGGGAACTTCCAGCTATGGCGGCTATAGGAGAGAAAGAGTGGTACTTCTATGTGCCAAGAGATCGAAAGTATAGAAATGGAGATAGACCAAACCGAGTAACGACTTCAGGGTATTGGAAAGCCACCGGAGCTGATCGGATGATCAGA…
	PROTEIN	MTMSNQVNNNSEKGIEEDAHRGGHENHAQNDNEADDHDHDMVMPGFRFHPTEEELIEFYLRRKVEGKRFNVELIIFLDLYRFDPWELPAMAAIGEKEWYFYVPRDRKYRNGDRPNRVTTSGYWKATGADRMIRSETSRPIGLKKTLVFYSGKAPKGIRTSWIMNEYRLPHHETEKYQKAEISLCRVNKRPGVEDHPSLPLFLSTRHHNRSSSSSSSNPSDNNLNNNNNNNPEKLSTEYSGDGSTTTTTNSNSEVTIALANQNIYRPMPYGTSNTPMISTSNKEDDDENAIVDDLQRLVNYQISDGSSNINHQYYQVAQQFHNQQQLNVNALQLVAAATTAALVPQPQAALAMNMIPGGTIPNNALWDLWNPLVPDGNKDHYTNTLFREFN
BniB034400	CDS	ATGGGCATCCAAGAAACCGACCCGTTAGCCCAATTGAGTTTACCACCGGGTTTCCGGTTTTATCCTACCGACGAAGAGCTTATGGTTCAATATCTCTGCAGAAAAGCAGCCGGTTATGATTTTTCTCTCCAGCTTATTGCTGAAATCGATCTCTACAAGTTCGATCCTTGGGTCTTACCAAGTAAGGCACTATTCGGAGAAAAGGAATGGTATTTTTTTAGTCCGAGGGATAGAAAGTACCCAAACGGGTCAAGACCGAACCGGGTAGCTGGGTCGGGTTATTGGAAAGCTACGGGTACGGACAAAATCATCTCGACGGAAGGAAAAAGGGTCGGTATCAAGAAGGCTTTGGTGTTTTACATCGGTAAAGCGCCTAAAGGCACTAAAACCAATTGGATC…
	PROTEIN	MGIQETDPLAQLSLPPGFRFYPTDEELMVQYLCRKAAGYDFSLQLIAEIDLYKFDPWVLPSKALFGEKEWYFFSPRDRKYPNGSRPNRVAGSGYWKATGTDKIISTEGKRVGIKKALVFYIGKAPKGTKTNWIMHEYRLLEPSRRDGSSKLDDWVLCRIYKKQSSAQKQAYEHVVTSTRELSNNGTSSTTSSSSRFEDVLDSLHHETDNRNFQYANPNRFSSLRPDLTGDKTGFNGLSDTSSFDWGSFVGNVEHSSGPKLGLSHVVPSLEFNSGYLKMEEEFNNPDDFGFAQNGYGIDSVGFGYSGQVGGFGFI
BniB037742	CDS	ATGGTGGATCCGCATCCGGTGGCCATGGGTTTCAGATTCCGTCCGACCGACGATGAGATCGTGAACCATTACCTCAAGTCGAAAAATATGGATGGTAACACGAGTCATGTAGATGAAGTCATTAGCACAGTGGATATCTATAGCTTCGATCCGTTGGAGTTAGCTTCCCAGTCGAGTTCGACGAGGAAGGCTACGGACAATGTTTTGTATTTCTTCTGTCGGAAGGAGAACAAATATAACAGAGGAGAGAGACAGAGCAGGAAAACCAAGTCTGGTTCTTGGAAGAAAACCGGAGTTACAACGAATATCATGCGAAAGAGAGGAGATCGCGAGAAGATTGGTGAGAAAAGGGTCTTTGTGTTTCAGTACAGTAAGATTCTTGGTGGAGCGAAACTTAAA…
	PROTEIN	MVDPHPVAMGFRFRPTDDEIVNHYLKSKNMDGNTSHVDEVISTVDIYSFDPLELASQSSSTRKATDNVLYFFCRKENKYNRGERQSRKTKSGSWKKTGVTTNIMRKRGDREKIGEKRVFVFQYSKILGGAKLKSDWVMHEYVATFVSLTQTRAVTYTLCKVMFKGDASDLPYFSSAAAPAGGGGSGGGGGSGGSGGGGCDGGGGDGGGGGGCNGGGGDGGGGGGCDGGGRGGCDGGGSGGGDGGGGSGGGGSGGCDGGGGGGCDGGGSGGCDDGGSGGGGDGCGEVEHTHSLITPINNPGGGLSAEAERSSSELHNSGQFTGFLHLEEETQIEDAIRRAINNLSPHDLNCLLNYDYDDEEQGNSQEVSFYYLSFSETYHS
BniB038652	CDS	ATGGAGAGTCTCTCGCACATTCCTCCCGGCTATCGATTCCATCCTACCGATGAAGAACTCGTTGACTATTATCTTAAGAAGAAAGTTGCATTTCCGGGAATGCAAGTTGATGTGATCAAAGATGTTGATCTCTATAAAATCGAGCCATGGGATATACAAGAGTTATGTGGAAGAGGGACAGGAGAAGAGAGGGAATGGTATTTCTTTAGCCACAAGGACAAGAAGTATCCAACAGGGACAAGAACCAATAGAGCAACGGGCTCAGGATTTTGGAAAGCAACGGGTAGAGACAAGGCCATATACTCCAACCAAGAGCTTGTGGGGATGAGGAAGACTCTTGTTTTTTACAAAGGTCGGGCCCCAAATGGTCAGAAGTCTGATTGGATAATGCATGAATAT…
	PROTEIN	MESLSHIPPGYRFHPTDEELVDYYLKKKVAFPGMQVDVIKDVDLYKIEPWDIQELCGRGTGEEREWYFFSHKDKKYPTGTRTNRATGSGFWKATGRDKAIYSNQELVGMRKTLVFYKGRAPNGQKSDWIMHEYRLETDENAPPHEEGWVVCRAFKKKLTTMSYNTPRTMMGSSSGQESNWFTQQMVVANGSYYHLPDLESPRMFQGSSSLHHNDNDPYGIVLSTINATPTTLMQGDDEEDRGRIITNDDDPGHIITNDDDHGHFVTNDDDHMIMMNTNTDRHRHHQSELLLNDDHNDQVMDWQTLDKFVASQLIMSQEEEEVNKDPSDNSSSETFHHLAEDQATMASMNASSSSSPCSFYSWPQNTNT
BniB005531	CDS	ATGAGTTCGATGAATGGAGGTGTACCGCCAGGTTTCCGATTTCACCCAACAGACGAAGAACTTCTTCATTACTACTTGAAAAAAAAGATTTCTTATGAAAAGTTCGAGATGGAAGTCATAAAGGAGGTTGATTTGAACAAGATTGAGCCGTGGGATTTACAAGATAGATGCAGAATAGGTTCAACGCCTCAAAGCGAGTGGTATTTTTTCAGCCACAAGGATAAGAAATATCCAACAGGTTCGAGGACGAACCGTGCGACTCACTCAGGTTTTTGGAAGGCGACGGGACGTGACAAATGCATAAGAAACTGTTACAATAAGATAGGCATGAGGAAGACTCTTGTCTTCTATAAAGGAAGAGCTCCTCATGGCCAAAAGACCGATTGGATCATGCACGAG…
	PROTEIN	MSSMNGGVPPGFRFHPTDEELLHYYLKKKISYEKFEMEVIKEVDLNKIEPWDLQDRCRIGSTPQSEWYFFSHKDKKYPTGSRTNRATHSGFWKATGRDKCIRNCYNKIGMRKTLVFYKGRAPHGQKTDWIMHEYRIEDTNDEPSEDGWVVCRVFKKKNLFKVGNDAGSSINNNRLEAQNNFVRRENTYHGVTAFELNNPGEIGLHQYQPPMFQSQAILTSPHQKKPISIGYDYSLALLQRESESEGVQHHQACEQSGVEVGTCKSVGEGGTVTCHMADHDDSSRAMRFDKDEGNNNSSSVQPSSNLLSLRGENGFLGLF
BniB011874	CDS	ATGTATGAATACAACGACATGTATGAATACAACGACGAAGATGGAGGGATTCAGTTTCAACCCTACAACGACGAACTCATCAATGAATATTTAATCCCCAAGTTGCAAGGTAAACCGTGTCGAGAGATCACTATGAAGGATGTTTATTCAAAGGAGCCATGGTTGCTGGACCATCCCATGGGTTCGTTTTTTAAGAAGAACGAGTGGTACTACTTTGTGACAAGGACTCAGATCTCTAAGAAGAAAATTGGTTGTGGTAAGAAAGCGAAACGGATAATCACCCGAGACTATGATAGTGGGTTTTGGAAGGCTTATGCGAAAGAAGATATCAGGGACAAGGAAACAAATATGGTCATTGGGGAACAGCAAACCCTAGCTTTTGTTAAAAGCAAGGTAAAT…
	PROTEIN	MYEYNDMYEYNDEDGGIQFQPYNDELINEYLIPKLQGKPCREITMKDVYSKEPWLLDHPMGSFFKKNEWYYFVTRTQISKKKIGCGKKAKRIITRDYDSGFWKAYAKEDIRDKETNMVIGEQQTLAFVKSKVNNKKKQKRGDGTSCDVVVPGSESSWIMTEYMLPEIDDKFRELVICKIHVIENSNKNKKDDSHEASTSSYHHQHESALASSFSDQQLQHPINEPHHQHESALASSFSDQQLQHPINEPHHQHASALASSFSDQQLQHQDHEASTYLHHIYSSTSTSEQQPINIFDHGTLLTPNLEQHLASLSFERQTMNLYDDLASLSFEQQPINLYADLASLSFEEEPNNVTCKIQENNKKDDHEAHRLVPEIPLIGSENNDQVFEDSRQVSEKDEQ…
BniB026268	CDS	ATGGGTTCGTCGTCGAATGGAGGAGTGCCACCTGGGTTTCGGTTTCATCCGACGGACGAAGAACTTCTCCATTACTACTTAAAGAAGAAAATCTCTTACCAGAAGTTTGAGATGGAAGTTATCAGAGAGGTTGACTTAAACAAGCTTGAGCCTTGGGATTTACAAGAGAGATGCAAGATAGGGTCAACTCCTCAAAACGAATGGTATTTCTTTAGCCACAAGGACAGGAAATATCCGACGGGATCAAGGACAAATCGTGCAACTCAAGCAGGATTCTGGAAGGCGACGGGACGTGACAAGTGCATAAGGAACTCTTACAAAAAGATAGGAATGAGGAAGACTCTTGTGTTCTACAAAGGAAGAGCTCCTCATGGGCAAAAGACTGACTGGATCATGCAT…
	PROTEIN	MGSSSNGGVPPGFRFHPTDEELLHYYLKKKISYQKFEMEVIREVDLNKLEPWDLQERCKIGSTPQNEWYFFSHKDRKYPTGSRTNRATQAGFWKATGRDKCIRNSYKKIGMRKTLVFYKGRAPHGQKTDWIMHEYRLEDADDPQGNPSEDGWVVCRVFMKKNLFKVVNDGGSSINSADQNNHDASNNNNSLQARSFMHRDSPYQLVRNHGATTFELNKPDPALHQYPPIFHKPPSLGFDYSSGLQRDCENAASEGLQYQQACEPGLEVGTCETVANHNHQQGLGEWSMMDRLVTCHMGNEDSSRGIRCEDGNNNSSAVVQPVPTSNQLSLRSEMDFWGYSK
BniB026365	CDS	ATGGATGACTACTCTATCTTATCTCAAGAAGACATGGGAGAGTACTACTGTATAATATCTCAAGAAGATCATTACTTGGTATTATCTCAAGAAGACAACCAAATCGAACCAGAAGACGAGATCATAATCTCGTACTATCTGAACATGATGATCAACAACCGCAAATCCTGGCCTAACCACTTTCTCCGAGACGACGAAGCAAACGTGTACAACCTGAATCCATGGAGTTCCTTCAATACTCCGAACCCTAACAACTTCATCTTCGTCAAACGCAGAACAGATGCTTGCGGTAAGAGCGATGGAAGTGTCTCTGGTTGCTGGAGGATCATGGCCCGTGGCCATGATAAACTGATCAAGTCCGGGGAGACCGGGAGGATTCTAGGGTTCAAGAAGATTCTC…
	PROTEIN	MDDYSILSQEDMGEYYCIISQEDHYLVLSQEDNQIEPEDEIIISYYLNMMINNRKSWPNHFLRDDEANVYNLNPWSSFNTPNPNNFIFVKRRTDACGKSDGSVSGCWRIMARGHDKLIKSGETGRILGFKKILKFCEKDMKRSEEQIIWVMEEYRLVDKWKQDQVICRIRVCYNLRLVPCSPSIFLFSING
BniB026921	CDS	ATGCCTATTATTAAATCTCACACTCTCGTGGCGACTGTTGTGTACGCTGGAGCCTTCATGGAGGTGGAGCCGGTGGGAGTTTCTAAGGATACTATGGAAGCGTCAACGGTGTTTCCAGGGTTCAAGTTCTCGCCGACGGACGAGGAGCTGATCTCGTATTACCTGAAGCGGAAGATGGACGGTTTAGAGCGGTCCGTTGAAGTTATACCGGAAACCGATATTTACAACTTCGAGCCTTGGGATTTGCCCGGTAAGTCGATAATTAAATCTGATACCGAGTGGTTCTTCTTCTGCGCCCGTGGCAAAAAGTATCCACATGGCTCACAGAATAGGAGGGCAACCAAGATGGGATACTGGAAAGCCACTGGGAAAGAACGTGATGTTAAGTCTTCCTCTGAG…
	PROTEIN	MPIIKSHTLVATVVYAGAFMEVEPVGVSKDTMEASTVFPGFKFSPTDEELISYYLKRKMDGLERSVEVIPETDIYNFEPWDLPGKSIIKSDTEWFFFCARGKKYPHGSQNRRATKMGYWKATGKERDVKSSSEVIGTKRILVFHIGRAPKGERTEWIMHEYSMKGVSLDDALVVCRLRKNREFHTSTSQKAPEPTSAVEKHMILQNGVASSGSPSDWDSMIDFYLAGDSGENLLAEMAETSSNLQVHADEDFFADIISDEIINLDEAVMTGNTPNEVPTLESASSAIRVLPLPNMIDKQMASLLEEGPSQEKKGKENSGTEPLSSCFVGLYSIKTVNRARWDTIICVVALLAVLFYLE
BniB027750	CDS	ATGCTAAAGCCAAGAAAGCCATTTAAGTTTGTAAATGCGCTTGTTGATACGCCAGATTTTCTTGCGCTGGTGGAGAGTTTCTGGACTGGAACTGAGAGTTTGTTTATATCAACTTCGGCTCTGTTTAGGTTGTCAAAGAAGTTAAAATCTTTGAAACCAATGCTGAGGAAGTTGGGTAAAGACAAGGTGGGAGATATTTTTAAACGAACGGCAGAAGCATATAAGGTTCTCTGCGAAGCTCAGACAAAGACCTTGGAGGATCCTAATCAGAGTAATGTGACAGCAGAATCTTTTGCTTATGGAAGATGGTCCCTTTTATCTATGGTGGAAGAACGGGTGATAACTCAAAGGGCAAAAATCCATTGGCTTAGCGTGGGAGATGGAAATAATAAAAACTTT…
	PROTEIN	MLKPRKPFKFVNALVDTPDFLALVESFWTGTESLFISTSALFRLSKKLKSLKPMLRKLGKDKVGDIFKRTAEAYKVLCEAQTKTLEDPNQSNVTAESFAYGRWSLLSMVEERVITQRAKIHWLSVGDGNNKNFHRAAKVREVRNSIREIKRIDGSVAGNQEDIKREAVEYFHNFLTHTPPDYKEIPSDDLKELLNYQCSEDDGRMLIGVVTAEEVKKVLFSMAADKSPGPDGYTSEFFRASWSITGRDFVAAIQSFFEKVGLRFRPTDEELVRFYLRRKINGHDDDVSAIREIDICKWEPWDLPDFSVIKTNDSEWLFFCPLDRKYPNGSRQNRATIAGYWKATGKDRKIRSGKDSIIGVKRTLVFHSGRAPKGTRTNWIMHEYRATEDDLSGTNPGQS…
BniB028982	CDS	ATGAGTTCGTCGTCGAACGGAGGAGTGCCACCTGGGTTTCGGTTTCATCCGACAGACGAAGAGCTTCTCCATTACTACCTAAAGAAGAAAATCTCTTACCATAAGTTTGAGATGGAAGTTATCAGAGAGGTTGACTTAAACAAGCTCGAGCCTTGGGATTTACAAGAGAGATGCAAGATAGGGTCAACTCCGCAGAACGAATGGTATTTCTTCAGCCACAAGGATAGGAAATACCCAACGGGTTCAAGGACCAACCGTGCTACTCATGCAGGGTTTTGGAAGGCAACAGGACGAGACAAATGCATAAGGAACTCTTACAAGAAGATAGGAATGAGGAAGACACTTGTGTTCTACAAAGGAAGAGCTCCTCATGGCCAAAAGACTGATTGGATCATGCAT…
	PROTEIN	MSSSSNGGVPPGFRFHPTDEELLHYYLKKKISYHKFEMEVIREVDLNKLEPWDLQERCKIGSTPQNEWYFFSHKDRKYPTGSRTNRATHAGFWKATGRDKCIRNSYKKIGMRKTLVFYKGRAPHGQKTDWIMHEYRLEDADDSQGNPSEDGWVVCRVFMKKNLFKVVTEGGSSINSTDQYNHDASNNCNTLQARSFMHRDSPYQLVRNHGATTFELNKPDLTLHQYPPIFHKPPSLGFDYSAGLPRDCESAASEGLQYQQACEPGLEVGTCETVASHNHQQGLGEWSMMDRLVTCHMGNEDSSRGIRFEDGNNNSSSVVQPVPETNQLSLRSEMDFWGYSK
BniB028985	CDS	ATGGGGAAAACTGAGTTGGCTCCTGGATTTCGGTTCCATCCGACTGATGTTGAACTCGTGAGATATTACTTGAAGAGGAAAGTGTTGGGGAAAAAGCTCCTCGTTGATGCGATTTGTGAACTTGACATTTACAAGTTCGAACCTTCTGATTTGCCTGATAAGTCCTATATAAAGAGTGGGGATCTGAAGTGGCACTTCTTCTGCCCAAGGGAAAAGAAGTATGCAACTGGGGTTAGGTCAAACCGTGCTACAGAGTGTGGTTACTGGAAGACCACAGGCAAGGAGAGAGCCGTTCTATGCAATGATGAAGTTGTGGGGAAGATTAGGACTCTGGTTTATCACGTTGGTAAGTCACCTCGTGGGGAGCGGTCTGATTGGGTTATCCATGAATACAGGCTT…
	PROTEIN	MGKTELAPGFRFHPTDVELVRYYLKRKVLGKKLLVDAICELDIYKFEPSDLPDKSYIKSGDLKWHFFCPREKKYATGVRSNRATECGYWKTTGKERAVLCNDEVVGKIRTLVYHVGKSPRGERSDWVIHEYRLEDKVLAQKNIPQDTYVLCVLFKKDGPGPRNGAQYGAPFREDDWSDHEQQTDVPSTSNLANLLRPNAETSVVVAPSQDPNKDCFAGMISESCVSDFVPYTATTTSEFPHLNDAAHTLLSAAPLLDSNSTASLVPTLEAPSSNHDDIYSMLDLFIDEDEYLHFCLPNNNEVRHDPNVSAPVFLEGEDMFSDLLDMSNMHNNSMPMTPSYELIENSELYLELQDLTAPLVPPPTVNSSGASLSNQSHFHFSTAANDAANDDDPFGFSAFM
BniB029665	CDS	ATGAACTTACCAGCAGGATTCCGATTCCATCCAACGGACGAAGAGCTCGTGAGATTCTACCTGATCCGGAAATGCGCGTCGGAGCAGATCTCAGCTCCGGTTATCGCCGAAATCGATCTCTACAAGTTCAATCCTTGGGATCTTCCAGAGATATCTCTGTACGGAGATAAAGAGTGGTACTTTTTCTCACCCAGAGACCGGAAATACCCAAACGGTTCGCGTCCAAACCGGGCAGCTGGAACCGGTTATTGGAAAGCGACCGGAGCGGATAAACCGATCGGTAAACCGAGGACGTTGGGTATAAAGAAAGCGCTCGTCTTCTACGCGGGGAAAGCTCCAAAAGGGATTAAAACGAATTGGATCATGCACGAGTATCGTCTCGCTAATGTCGATAGATCA…
	PROTEIN	MNLPAGFRFHPTDEELVRFYLIRKCASEQISAPVIAEIDLYKFNPWDLPEISLYGDKEWYFFSPRDRKYPNGSRPNRAAGTGYWKATGADKPIGKPRTLGIKKALVFYAGKAPKGIKTNWIMHEYRLANVDRSASNNKKNNLRLDDWVLCRIYNKKGTMEKYYPADEKPMSSPFDTSLSSTLQEDDSSSSGVSPDAKEEVQSEPKWRELEDALEAFDSSMFCGGGGGGSMDLLQSDAFVPQFVYQPTDYCFASFQDPLEQKPLLNWSFAPQG
BniB029854	CDS	ATGAACATATCAGTAAACGGACAGTCACAAGTGCCTCCTGGCTTTAGGTTTCACCCGACCGAGGAAGAGCTCTTGCAGTATTACCTCCGCAAAAAAATGTCCAACATCAAGATTGATCTCGATGTTATTCGTGATGTTGATCTCAACAAGCTCGAGCCTTGGGATATTCAAGAGATGTGTAAGATTGGAACGACGCCACAGAACGATTGGTACTTCTTTAGCCACAAGGACAAGAAGTATCCCACGGGAACAAGAACCAACCGAGCGACCACGGTCGGGTTTTGGAAAGCAACAGGACGTGACAAGATCATATACAGCAATGGCGTTAGGATCGGTATGCGGAAAACGCTTGTCTTCTACAAAGGTCGAGCCCCTCATGGTCAAAAATCCGACTGGATC…
	PROTEIN	MNISVNGQSQVPPGFRFHPTEEELLQYYLRKKMSNIKIDLDVIRDVDLNKLEPWDIQEMCKIGTTPQNDWYFFSHKDKKYPTGTRTNRATTVGFWKATGRDKIIYSNGVRIGMRKTLVFYKGRAPHGQKSDWIMHEYRLDDNLLVSSSNLDDDVTLETCEFIGGDEGWVVCRVFMKKTLCKPVISSSPPRSVKTPSFNEETIGQFLEVMEQSCKEETILDPFLKLPNLECPNNTVASYHRLMDDQVNSCHISKSVDPSFVTSWAALDRLVASQLNGHNSCYEIPQSPFHGLNRPGSYNTGLTPDYYIPEMEIWNDDAIVQPIVSHVQQ
BniB030338	CDS	ATGGCGATGCCGTCAAGAAATCACCGCAAAGAAGACCTCTCCTCGCCGGCGGAACCGCAACCACCACCATTACCATCTTCTTCCGCCGCTGATAACTTCTCTCGTTCTCCTCGGAGTGAACCTACCGTTTTCCCGCCAGGTTACAAGTTCGTACCATCCGAAGAAGACCTCATCGTGCATTACTTGAAACCTTTCTTGCGAAGCAACAAGAACCCACCACCAAACGTCCCGATTCATCGCGTGAACATCTACGAGTCGAACCCAGAACGACTCTCAAAGGAATACGAGCAGGGTAATGATAAAGAATGGTTCTTTATAACGGAGAGGACCAAGATGCATGAAGGTGGCAAAAAAAAACATAGTCGATGTGACAACGGTGGATTCTGGAAGGCAAGATCA…
	PROTEIN	MAMPSRNHRKEDLSSPAEPQPPPLPSSSAADNFSRSPRSEPTVFPPGYKFVPSEEDLIVHYLKPFLRSNKNPPPNVPIHRVNIYESNPERLSKEYEQGNDKEWFFITERTKMHEGGKKKHSRCDNGGFWKARSVLEEFKTLKGVAFSRMVLNHYTGNNQNGVKSEWVMYEYLTESSPQDKSNGDNKMDYALCKIYMTPKGIKRKAEEEENEKRMKKKEEGGEASQEIDQPCNPAIQQTHLPPQPCPFSSDEFRGSIDLSIPLDEDTESNNSCCVKKSSKED
BniB031842	CDS	ATGGCGGACGAGAAAGATCAAGACTCAAATCCTCCCGCGGAAGATGGAGCGATTCGCTGGCCATTAAATAAGAGATCAATGGATGAAAGATCAGTTACTGGGTTTGATAGAGCACACGAGCCCGAGTTCAAGAAACCGAAACTCGAACAGCTCCAGAGAAAAGTTTATCACTCTGTTCTCCTTCCTTCCCACGCAGAAACCTCGGGAACATCATCACACAACGATTCTCATATCATAGAAAAGATGATGAACGAGTTGAAGATTGATCAAGAAACTCACATCTCTGTTTCGGATAACTCTGAAAATAATGCAACTTGGAGTCCAAACTCTGTTGGTAAACGGGTCCATGCAAGATCTCCTTATGATGAAGATGATTCACCAACGAAAAAGAAGATCAAA…
	PROTEIN	MADEKDQDSNPPAEDGAIRWPLNKRSMDERSVTGFDRAHEPEFKKPKLEQLQRKVYHSVLLPSHAETSGTSSHNDSHIIEKMMNELKIDQETHISVSDNSENNATWSPNSVGKRVHARSPYDEDDSPTKKKIKLHKQAYDHVLHAFHAESPALSHSRTLIMQDLLHECNKAHTSSSIDDNNKADPTLIESSTTAKIVEPRSRLLPVDIYFRPTDLQMSIFLKQKALGQPIDAFIVPEERHDIFSLPPRDLPGYPEETHWYYYCMKPKGQEDPRSLWTRFREDTAVFDDQQENCVGIKRRFTLVEREEECNDDIFLPDEEEPPVEEWFIKEISLPSSVADTDWVLCHVVLKKRVKPNEVEEEEYYDEEEEEEDE
BniB032681	CDS	ATGGATAAGGTTAACCTTGTGAAGAATGGTGTTTTGAGACTGCCACCTGGTTTCAGGTTTCACCCCACTGATGAGGAACTTGTGGTTCAGTATCTCAAGAGAAAAGTCTTTTCTTCTCCATTACCAGCTTCTATCATTCCTGATGTCGATGTCTGCAGAGCTGATCCTTGGGACTTACCTGGCAACTTAGAAAAGGAGAGGTACTTCTTCAGCACAAGGGAAGCCAAGTACCCAAATGGGAACCGGTCCAATAGGGCAACTGAGTCCGGTTATTGGAAAGCTACTGGTATTGATAAACGGGTTGTGACCTCTAGAGGAAACCAAATCGTTGGTTTGAAGAAAACTCTCGTCTTCTACAAAGGCAAACCACCTCATGGCTCAAGAACCGATTGGATCATG…
	PROTEIN	MDKVNLVKNGVLRLPPGFRFHPTDEELVVQYLKRKVFSSPLPASIIPDVDVCRADPWDLPGNLEKERYFFSTREAKYPNGNRSNRATESGYWKATGIDKRVVTSRGNQIVGLKKTLVFYKGKPPHGSRTDWIMHEYRLSSSPPSSIGPTQNWVLCRIFLKKRAGDKNDDEGDNRNLRYDNGHIEIITTNQTGDKTKPIFFDFMRKERTTDLNLLPSSPSSGHASSGVTTEIFSSDEETSSCNSLRRNL
BniB032755	CDS	ATGAGGGCTGAAGGTAAGGACCACGAAGACGAGGATGAAGCAATACTTCCTGGATTTAGATTTCATCCAACGGACGAAGAGCTTTTAGGGTATTATCTTCGAAGAAAAGTAGAGAACAAACCGATCAAACTCGAGCTTATTAAACAGATTGATATCTACAAGTTCGATCCTTGGGATCTTCCTAGAGTGAGCAACGTCGGGCAAAGGGAATGGTATTTCTTCTGCATGAGAGGCAGGAAATACAAGAATAGCGTTAGACCAAACCGTGTCACCGGCTCAGGTTTCTGGAAAGCCACCGGTATTGATAAACCGGTTTACTCCAATTTTGACTGCATCGGTCTAAAGAAATCTTTGGTTTACTACCTTGGTTCTGCCGGTAAGGGCTCTAAAACCAATTGG…
	PROTEIN	MRAEGKDHEDEDEAILPGFRFHPTDEELLGYYLRRKVENKPIKLELIKQIDIYKFDPWDLPRVSNVGQREWYFFCMRGRKYKNSVRPNRVTGSGFWKATGIDKPVYSNFDCIGLKKSLVYYLGSAGKGSKTNWMMHEFRLPSTTKTDSTTQQVEVWTLCRIFKRVTHQRNPTIIQPNRKPVITLTDSCSKTSSSDSDHTSHRVVDSLSHKLHEPQTQNPYGNQLTTVGFNQPTYTCHDNNFLSFLNINGGDFIGDSASWDELSKLIAFVVYDNNINGSIYWLEMLDGDIILALDLHTLEYRDVPVPPCRIIC
BniB041017	CDS	ATGAACAAGAATGGTTTCATAACAACTTTGAATGTGTACAACGACGAACCGTGGCTTCTTGATCACGTTAACAACGATATGTTCAAGAGAAACGAATGGTACAACTTTAGTCCGAGGAACAGAAGAGGTGCCAGGAGTGTTTACCGGACCGTACCGGAAAGGAGAGAAAGCGAAGGCGGCAGATGGAAAAGCACTAGTGGTCAAGAGGCGATCATGGACAAAAATATCAAGGTGGAGGGTTACAAGGAGAGTTTCGTGTACTACAAGAAAGTGATGGGAAAGGAGGATAAGACTGGTTGGGTCATGACAGAATATTCGTTTCAAGAGGGTGTTCATGCTGACGATTTGGTCTTGTGTTATATACGAGGAAAGATTGAGAAGAAAGTTAAACCCAACCAG…
	PROTEIN	MNKNGFITTLNVYNDEPWLLDHVNNDMFKRNEWYNFSPRNRRGARSVYRTVPERRESEGGRWKSTSGQEAIMDKNIKVEGYKESFVYYKKVMGKEDKTGWVMTEYSFQEGVHADDLVLCYIRGKIEKKVKPNQVPKVGEKHMIGDDPHE
BniB042268	CDS	ATGGGTCGCGGCTCAGCCACGTCGCTCGCTCCAGGGTTTCGTTTCCACCCAACGGACGAGGAGCTCGTCCGCTACTACCTGAAACGCAAGGTCTGCAACAAACCCTTTAAGCTCGATGCTATCTCCGTCACCGATGTGTACAAATCCGAGCCTTGGGATCTTTCAGGCAAGTCGAAGCTGAAAAGTAGAGACTTGGAGTGGTACTTCTTCAGTATGCTTGATAAGAAGTACAACAACGGTTCCAAGACCAATCGTGCCACGGAGAAAGGCTACTGGAAGACGACGGGGAAGGATCGGGAGATTCGTAATGGTTCGAGGGCCGTAGGGATGAAGAAGACACTTGTTTATCATAAGGGTCGAGCTCCTCGTGGGGAAAGGACTAATTGGGTTATGCATGAG…
	PROTEIN	MGRGSATSLAPGFRFHPTDEELVRYYLKRKVCNKPFKLDAISVTDVYKSEPWDLSGKSKLKSRDLEWYFFSMLDKKYNNGSKTNRATEKGYWKTTGKDREIRNGSRAVGMKKTLVYHKGRAPRGERTNWVMHEYRLTDEELKKTGAPQDAYVLCRIFQKSGTGPKNGEQYGAPYLEEEWEEDKMTFVPEQDALSEGLAVDDDVYLDLDDFDEKPENVVVYDAIPVQPNYFHGESSNNAESGNYSDSGNYIQPGNFAVDSGGCFEQPIETFEEDQKPIIRDGSIQPCSLFTNEQNGCGVQDENVVNLETTNNNVFADDNCYSDIPIDTNYMPDESFIDPSNNLQLSDGLFLEADDLGSALPDFDFEDYLNFFGDEDAQNLTLDVSQLLGSEDALPAQDGL…
BniB042292	CDS	ATGGCGGTTGTGGTAGAAGAAGGCGTGGTGTTGAATCATGGAGGTGAAGAGCTTGTTGATTTACCACCTGGATTCAGGTTTCATCCAACAGATGAAGAGATCATATCATCCTACCTCAAAGAGAAGGTTTTAGACAGCCGATTCACGGCTGTGGCCATGGGAGAAGCCGATCTTAACAAGTGTGAACCCTGGGATTTGCCAAAGAGGGCAAAGATGGGGGAGAAAGAGTTTTACTTCTTTTGTCAAAGGGACAGGAAGTACCCGACCGGGATGAGGACGAACCGTGCAACCGAGTCCGGTTATTGGAAAGCGACCGGGAAGGACAAGGAGATCTTCAAAGGCAAAGGTTGTCTCGTTGGGATGAAGAAAACACTTGTGTTTTATAGAGGAAGAGCTCCT…
	PROTEIN	MAVVVEEGVVLNHGGEELVDLPPGFRFHPTDEEIISSYLKEKVLDSRFTAVAMGEADLNKCEPWDLPKRAKMGEKEFYFFCQRDRKYPTGMRTNRATESGYWKATGKDKEIFKGKGCLVGMKKTLVFYRGRAPRGEKTNWVMHEYRLEGIYSYHNLPKTARDEWVVCRVFHKNNPSTTTQQMTRIPIEDLTRTDSLENIDHFLDFSSLPPLIDPSFTGQPNFKPINPPTYDISAPIQLHHFNSSYQPMFSHQGFGSASGSGSTYNKNKEMIKMEQSLVSVSQETCLSSDVNATTTTEVSSGPAMKQEMSMMGMVNGSKSYEDLCDLRGILWDY
BniB042356	CDS	ATGAGAAACGGGAAAGGCACGAGAAGAAGAAAGCCGAAGAAGAAAGGTGAAGGGAAATCATTGCTTCCTAGCAAGGATCAAGAATGGTACTTCTTCAGTCCACGGGACAGAAAGTACCCCAATGGTTCAAGAACAAACCGGGCAACAAAAGGCGGTTACTGGAAAGCAACGGGCAAAGACCGGAGGGTGAGTTTGAGAGATCGAGCCATAGGAACCAAGAAAACATTAGTTTATTACCGTGGACGCGCACCACATGGTATTAGAACTGGTTGGGTCATGCATGAATATCGCCTCGATGAAACCGAATGCGAGCCCACTGCTTTTGGCATGCAGGATGCATATGCACTTTGCCGTGTTTTTAAGAAGATAATCGTTGAAGCGAAACCAAGACTAGATCAA…
	PROTEIN	MRNGKGTRRRKPKKKGEGKSLLPSKDQEWYFFSPRDRKYPNGSRTNRATKGGYWKATGKDRRVSLRDRAIGTKKTLVYYRGRAPHGIRTGWVMHEYRLDETECEPTAFGMQDAYALCRVFKKIIVEAKPRLDQHQQHHHQHYVNTSSNISGNSSYDVCSDLEISSSTHQVLPNYNNAIETPPRFGNTNATGDHDDWSQYMSQGMPTGFSNYGSPYGSYLSQPIVNTEIECGMLQHQMSLPPLQVENSPVQTSDFSNGMNQNSGQCGFSDFTFVASNSNQLYNNNVDNHIIHIGSLDEQLLNAGNTTWMKTSDESLKQSFMEDQEILPSFEDNDQDLDFFGGSRTNAINNIEIDDFFSFENQVEDTDKSNITLNSSGSGMVEEDIKVDHKMLICTRQTTE…
BniB042381	CDS	ATGGACGGGACTTGGATTGTGGATGGTCCATGGATTGTGAAGAATGTAAAGAATGTGTCTGTGTCATCAGATCTGCAGATTGAAGACTGCGGAGCATGTATAAACTGTCCCAACTGCGGTTACCGGAACGACAACAGAAATGTAATAATGACTCCATGGCCAGGCCTTCCTAGAGGTGTGAAGTTCGAGCCAACCGATGAAGAAGTGATCGAGCATTTGGAAGCCAAATGTGGGATTGATGGCTCAAAACCAAATCCTTTTATTCAAGACTTTATCTTCTCAGTGGATGATATCAATTACACTCACCCTCAAAACCTTCCAGGTGTGAATAAGGATGGAACTAGCACCTTCTTCTTTAACAAGACGGTGCATGCATATCCCAAGGGGGAAAGAAAGAGG…
	PROTEIN	MDGTWIVDGPWIVKNVKNVSVSSDLQIEDCGACINCPNCGYRNDNRNVIMTPWPGLPRGVKFEPTDEEVIEHLEAKCGIDGSKPNPFIQDFIFSVDDINYTHPQNLPGVNKDGTSTFFFNKTVHAYPKGERKRRRITLSDPTDGSVRWRKTGKTRPVMVNGVQKGCKKFMVLYKNAKKGLKPNKYKWVMHQYHLGREEEEEETGEYVVSKIMYQQQQGLEEENTPEASSSLVEKNPNYWDFNMSYDGNCMVSDLGIADLGSLPDICSFASEDSLMSCLEWI
		ATGGAGGTGGAGAAGAGGATAATGGTCAATGGAGGCATGAAACTACCAGTTGGATACAGATTTCACCCAACGGAGCAGGAGCTTATCCTTCATTACTTGCTCCCAAAGGCCTTTGCTTCTCCTTTGCCTTCCTCCATCATCCCTGTCTTTGACGTTTTCTTCTCTCATCCTCTCACTTTCCCAGGGGATCAAGAGGAGAGGCAGAGGTACTTCTTTTGCAAGAAGAGACAAGAAGTCTCAAGAATCAAGATTTCATCTGGTAACGGTTATTGGAAACCAATCAGGAGAGAAAGAGAAATCATTGCTTGTGGTAGAACAGTTGGTATTAGAAGAACACTTGTTTTCCATGGAACAAACAACTCTTCTTCTAATTACAACAAAACCAGATGGTGCATGACA…
		MEVEKRIMVNGGMKLPVGYRFHPTEQELILHYLLPKAFASPLPSSIIPVFDVFFSHPLTFPGDQEERQRYFFCKKRQEVSRIKISSGNGYWKPIRREREIIACGRTVGIRRTLVFHGTNNSSSNYNKTRWCMTEYCLAGFAPTKVLGEWAVYNVYKRKESKGRRQRKSRVRDDDEEEDLNCIHFTIGTDHDTGPPPPSPPTSADESGGII
