# Supplementary material for: Genome-wide identification and characterization of NAC genes in Brassica juncea var. tumida
Source: PeerJ. 2021 May 5;9:e11212. doi: 10.7717/peerj.11212 (PMC8106399; doi:10.7717/peerj.11212)
Supplement: Table S5 [file peerj-09-11212-s014.xlsx]

## Sheet: q-PCR  under cold stress
Average Fold Change	BjuNAC073	BjuNAC240	BjuNAC241	BjuNAC112	BjuNAC184	BjuNAC083	BjuNAC223	BjuNAC006	BjuNAC074	BjuNAC295	BjuNAC170	BjuNAC178	BjuNAC146	BjuNAC268
0h	1.05986	1.02401	1.05363	1.02475	1.03295	1.041	1.0268	1.17371	1.02794	1.02637	1.02424	1.02374	1.02444	1.0241
6h	1.26161	0.967441	1.28224	0.636247	0.738741	3.55361	0.777139	1.03372	0.228172	0.0143955	7.13446	2.33964	1.17281	1.41949
12h	1.16966	1.15207	0.580027	0.534941	0.809581	2.89778	0.779402	0.752999	0.199247	0.112462	8.22591	1.23948	1.61914	2.00681
24h	2.89116	1.28388	2.43427	0.993377	0.862081	16.3809	9.36141	10.4662	0.538629	0.153744	10.0187	0.652651	0.541435	0.60702
48h	2.68978	1.24736	2.12422	0.841301	1.08705	2.3777	6.47859	3.73748	0.34812	0.194926	7.89384	0.450124	0.231084	0.239514

## Sheet: 0h-cold
calculate	actin	BjuNAC073	BjuNAC240	BjuNAC241	BjuNAC112	BjuNAC184	BjuNAC083	BjuNAC223	BjuNAC006	BjuNAC295	BjuNAC170	BjuNAC178	BjuNAC146	BjuNAC268	BjuNAC074
	21.9979	28.8639	30.5849	29.8706	27.8488	28.3408	27.633	29.3889	32.0731	30.2995	30.5762	22.7667	25.4777	23.9115	29.2906
	22.6052	29.3646	30.6055	29.463	27.7113	28.7107	27.237	29.5835	32.0436	30.5153	30.6757	22.8164	25.3537	23.8505	29.0922
	22.1786	29.6246	30.6763	29.1693	27.8241	28.4036	27.1199	29.6007	33.4063	30.3715	30.5775	22.7505	25.4438	23.954	29.3531
Ct average value	22.2606	29.2844	30.6223	29.501	27.7947	28.485	27.3299	29.5244	32.5077	30.3954	30.6098	22.7779	25.4251	23.9053	29.2453
STDev	0.311825
		BjuNAC073	BjuNAC240	BjuNAC241	BjuNAC112	BjuNAC184	BjuNAC083	BjuNAC223	BjuNAC006	BjuNAC295	BjuNAC170	BjuNAC178	BjuNAC146	BjuNAC268	BjuNAC074
Δct-0h		7.0238	8.3617	7.24041	5.53415	6.22448	5.06937	7.26383	10.2471	8.13487	8.34927	0.517321	3.1645	1.64477	6.98475
STDev		0.386642	0.0479365	0.352202	0.073275	0.197959	0.268886	0.117618	0.778361	0.109895	0.0570849	0.0343544	0.064072	0.051983	0.1362
SQ-STDev		0.496717	0.315489	0.470405	0.320319	0.369355	0.411746	0.33327	0.8385	0.330624	0.317008	0.313712	0.31834	0.316129	0.340273
ΔΔCt		0	0	0	0	0	0	0	0	0	0	0	0	0	0
ΔΔCt+(SQ-STDev)		0.496717	0.315489	0.470405	0.320319	0.369355	0.411746	0.33327	0.8385	0.330624	0.317008	0.313712	0.31834	0.316129	0.340273
ΔΔCt-(SQ-STDev)		-0.496717	-0.315489	-0.470405	-0.320319	-0.369355	-0.411746	-0.33327	-0.8385	-0.330624	-0.317008	-0.313712	-0.31834	-0.316129	-0.340273
2^-(ΔΔCt+SQ-STDev)		0.708718	0.803579	0.721762	0.800893	0.774129	0.751713	0.793735	0.559225	0.795193	0.802733	0.804569	0.801992	0.803222	0.789892
2^-(ΔΔCt-SQ-STDev)		1.411	1.24443	1.3855	1.24861	1.29178	1.33029	1.25987	1.78819	1.25756	1.24574	1.2429	1.2469	1.24499	1.266
Average Fold Change		1.05986	1.02401	1.05363	1.02475	1.03295	1.041	1.0268	1.17371	1.02637	1.02424	1.02374	1.02444	1.0241	1.02794

## Sheet: 6h-cold
calculate	actin	BjuNAC073	BjuNAC240	BjuNAC241	BjuNAC112	BjuNAC184	BjuNAC083	BjuNAC223	BjuNAC006	BjuNAC074	BjuNAC295	BjuNAC170	BjuNAC178	BjuNAC146	BjuNAC268
	21.186	27.9651	29.7852	28.8155		27.6955	24.3473
	21.1781	27.868	29.4378	28.621		28.1344	24.476
	21.2029	27.8064	29.604	27.3789		27.7777	24.4696
Ct average value	21.189	27.8798	29.609	28.2718		27.8692	24.431
STDev	0.0126799	0.0799848	0.173753	0.779402		0.233328	0.0725228
calculate	actin	BjuNAC073	BjuNAC240	BjuNAC241	BjuNAC112	BjuNAC184	BjuNAC083	BjuNAC223	BjuNAC006	BjuNAC074	BjuNAC295	BjuNAC170	BjuNAC178	BjuNAC146	BjuNAC268
	20.6575				26.7884			28.2838	30.529	29.8006		26.0028	19.8299	23.6481	21.6549
	20.554				26.8576			28.1406	31.1278	29.29		26.1266	19.9055	23.6672	21.795
	20.6283				26.7588			28.3097	30.8771	30.4355		26.2762	19.9869	23.3615	21.8192
Ct average value	20.6133				26.8016			28.2447	30.8446	29.842		26.1352	19.9074	23.5589	21.7564
STDev	0.0533382				0.050701			0.0911215	0.300717	0.57386		0.136905	0.0785423	0.171238	0.0886891
calculate	actin	BjuNAC073	BjuNAC240	BjuNAC241	BjuNAC112	BjuNAC184	BjuNAC083	BjuNAC223	BjuNAC006	BjuNAC074	BjuNAC295	BjuNAC170	BjuNAC178	BjuNAC146	BjuNAC268
	20.1883										34.493
	20.4427										36.7965
	20.1905										34.1655
Ct average value	20.2738										35.1516
STDev	0.146256										1.43384
		BjuNAC073	BjuNAC240	BjuNAC241	BjuNAC112	BjuNAC184	BjuNAC083	BjuNAC223	BjuNAC006	BjuNAC074	BjuNAC295	BjuNAC170	BjuNAC178	BjuNAC146	BjuNAC268
Δct-0h		7.0238	8.3617	7.24041	5.53415	6.22448	5.06937	7.26383	10.2471	6.98475	8.13487	8.34927	0.517321	3.1645	1.64477
Δct-6h		6.69081	8.41995	7.08281	6.18837	6.68018	3.24196	7.63144	10.2314	9.22874	14.8778	5.52194	-0.705844	2.94565	1.14311
STDev		0.0799848	0.173753	0.779402	0.050701	0.233328	0.0725228	0.0911215	0.300717	0.57386	1.43384	0.136905	0.0785423	0.171238	0.0886891
SQ-STDev		0.0809836	0.174215	0.779506	0.0735904	0.233672	0.0736229	0.105585	0.305411	0.576333	1.44128	0.146929	0.0949413	0.179353	0.103493
ΔΔCt		-0.332994	0.0582484	-0.157593	0.654218	0.455701	-1.82741	0.367616	-0.0157609	2.24399	6.74297	-2.82734	-1.22317	-0.218852	-0.501669
ΔΔCt+(SQ-STDev)		-0.25201	0.232463	0.621912	0.727809	0.689373	-1.75379	0.473201	0.28965	2.82032	8.18425	-2.68041	-1.12822	-0.0394999	-0.398176
ΔΔCt-(SQ-STDev)		-0.413977	-0.115967	-0.937099	0.580628	0.222029	-1.90103	0.262032	-0.321172	1.66765	5.3017	-2.97426	-1.31811	-0.398205	-0.605161
2^-(ΔΔCt+SQ-STDev)		1.19087	0.85118	0.649809	0.60382	0.620123	3.37243	0.720365	0.8181	0.141579	0.00343792	6.41036	2.1859	1.02776	1.31784
2^-(ΔΔCt-SQ-STDev)		1.33235	1.0837	1.91467	0.668673	0.857359	3.7348	0.833913	1.24934	0.314765	0.025353	7.85855	2.49339	1.31787	1.52115
Average Fold Change		1.26161	0.967441	1.28224	0.636247	0.738741	3.55361	0.777139	1.03372	0.228172	0.0143955	7.13446	2.33964	1.17281	1.41949

## Sheet: 12h-cold
calculate	actin	BjuNAC073	BjuNAC240	BjuNAC241	BjuNAC112	BjuNAC184	BjuNAC083	BjuNAC223	BjuNAC006	BjuNAC074	BjuNAC295	BjuNAC170	BjuNAC178	BjuNAC146	BjuNAC268
	20.0659	26.6817	28.2314	28.0443	26.5004	26.4963	23.6756	27.3746	31.3445
	20.1592	27.1483	28.3886	28.249	26.9883	26.7603	23.7488	27.9826	30.3771
	20.1128	26.9603	28.203	28.1365	26.2927	26.6908	23.5317	27.9792	30.8269
Ct average value	20.1126	26.9301	28.2743	28.1432	26.5938	26.6491	23.652	27.7788	30.8495
Δct		6.81747	8.16169	8.03061	6.48119	6.53647	3.53939	7.66619	10.7369
STDev	0.0466876	0.234742	0.0999452	0.102546	0.357074	0.136829	0.110412	0.35007	0.484137
	21.3364									30.966	32.9019	26.8402	21.2736	23.7028	21.8813
	21.1527									30.1847	32.1227	26.6835	21.2433	23.6792	21.8835
	21.2825									30.7314	32.8025	26.2729	22.166	23.8118	21.9367
Ct average value	21.2572									30.6274	32.609	26.5989	21.561	23.7313	21.9005
Δct										9.37014	11.3518	5.34168	0.30376	2.47409	0.643299
STDev	0.0944034									0.400933	0.424058	0.292961	0.52421	0.070729	0.0313566
		BjuNAC073	BjuNAC240	BjuNAC241	BjuNAC112	BjuNAC184	BjuNAC083	BjuNAC223	BjuNAC006	BjuNAC074	BjuNAC295	BjuNAC170	BjuNAC178	BjuNAC146	BjuNAC268
Δct-0h		7.0238	8.3617	7.24041	5.53415	6.22448	5.06937	7.26383	10.2471	6.98475	8.13487	8.34927	0.517321	3.1645	1.64477
Δct-12h		6.81747	8.16169	8.03061	6.48119	6.53647	3.53939	7.66619	10.7369	9.37014	11.3518	5.34168	0.30376	2.47409	0.643299
STDev		0.234742	0.0999452	0.102546	0.357074	0.136829	0.110412	0.35007	0.484137	0.400933	0.424058	0.292961	0.52421	0.070729	0.0313566
SQ-STDev		0.23934	0.110312	0.112674	0.360113	0.144575	0.119877	0.353169	0.486383	0.411897	0.434439	0.307795	0.532643	0.11796	0.0994748
ΔΔCt		-0.206329	-0.200016	0.790203	0.947035	0.311985	-1.52998	0.402364	0.489761	2.38539	3.21694	-3.00759	-0.213561	-0.690406	-1.00148
ΔΔCt+(SQ-STDev)		0.0330111	-0.0897043	0.902877	1.30715	0.456559	-1.4101	0.755533	0.976144	2.79729	3.65138	-2.69979	0.319081	-0.572446	-0.902
ΔΔCt-(SQ-STDev)		-0.445668	-0.310329	0.67753	0.586921	0.16741	-1.64985	0.0491944	0.00337766	1.97349	2.7825	-3.31538	-0.746204	-0.808366	-1.10095
2^-(ΔΔCt+SQ-STDev)		0.977378	1.06415	0.534819	0.404119	0.728722	2.65755	0.592328	0.508336	0.143858	0.0795838	6.49709	0.80158	1.48704	1.86866
2^-(ΔΔCt-SQ-STDev)		1.36194	1.23999	0.625235	0.665762	0.89044	3.13802	0.966476	0.997662	0.254636	0.145339	9.95474	1.67737	1.75123	2.14496
Average Fold Change		1.16966	1.15207	0.580027	0.534941	0.809581	2.89778	0.779402	0.752999	0.199247	0.112462	8.22591	1.23948	1.61914	2.00681

## Sheet: 24h-cold
calculate	actin	BjuNAC073	BjuNAC240	BjuNAC241	BjuNAC112	BjuNAC184	BjuNAC083	BjuNAC223	BjuNAC006	BjuNAC074	BjuNAC295	BjuNAC170	BjuNAC178	BjuNAC146	BjuNAC268
	19.8588	25.3869	27.9535	25.9433	25.5541	26.2105	20.7993	23.9752	26.7328	27.8255		24.9024
	19.8576	25.3001	27.7655	25.9363	25.3186	26.7421	21.0145	23.7017	26.6529	27.7225		24.9244
	19.9124	25.4235	27.925	25.6501	25.4032	26.1115	20.9346	24.1088	26.8307	27.7178		24.8776
Ct average value	19.8763	25.3701	27.8813	25.8432	25.4253	26.3547	20.9161	23.9286	26.7388	27.7553		24.9014
Δct		5.49388	8.00509	5.96694	5.54901	6.47843	1.03986	4.05231	6.86253	7.87901		5.02518
STDev	0.0312841	0.063376	0.101368	0.167296	0.119299	0.339175	0.108776	0.207492	0.0890579	0.0608783		0.0234091
calculate	actin	BjuNAC073	BjuNAC240	BjuNAC241	BjuNAC112	BjuNAC184	BjuNAC083	BjuNAC223	BjuNAC006	BjuNAC074	BjuNAC295	BjuNAC170	BjuNAC178	BjuNAC146	BjuNAC268
	19.3635										30.3687		20.7945	23.6786	21.9778
	19.8544										30.6818		20.7654	23.7369	22.2781
	19.603										30.3745		20.7235	23.6201	21.7853
Ct average value	19.607										30.475		20.7611	23.6786	22.0138
Δct											10.868		1.15416	4.07159	2.40681
STDev	0.245456										0.179103		0.0356812	0.0583793	0.24836
		BjuNAC073	BjuNAC240	BjuNAC241	BjuNAC112	BjuNAC184	BjuNAC083	BjuNAC223	BjuNAC006	BjuNAC074	BjuNAC295	BjuNAC170	BjuNAC178	BjuNAC146	BjuNAC268
Δct-0h		7.0238	8.3617	7.24041	5.53415	6.22448	5.06937	7.26383	10.2471	6.98475	8.13487	8.34927	0.517321	3.1645	1.64477
Δct-12h		5.49388	8.00509	5.96694	5.54901	6.47843	1.03986	4.05231	6.86253	7.87901	10.868	5.02518	1.15416	4.07159	2.40681
STDev		0.063376	0.101368	0.167296	0.119299	0.339175	0.108776	0.207492	0.0890579	0.0608783	0.179103	0.0234091	0.0356812	0.0583793	0.24836
SQ-STDev		0.0706768	0.106086	0.170196	0.123332	0.340615	0.113185	0.209837	0.0943929	0.0684461	0.303853	0.0390727	0.248036	0.252303	0.349187
ΔΔCt		-1.52992	-0.356619	-1.27347	0.0148523	0.253946	-4.02951	-3.21152	-3.38458	0.89426	2.73316	-3.32409	0.636835	0.907089	0.762037
ΔΔCt+(SQ-STDev)		-1.45924	-0.250532	-1.10328	0.138184	0.594561	-3.91632	-3.00168	-3.29019	0.962706	3.03701	-3.28502	0.884871	1.15939	1.11122
ΔΔCt-(SQ-STDev)		-1.60059	-0.462705	-1.44367	-0.10848	-0.086669	-4.14269	-3.42136	-3.47897	0.825813	2.42931	-3.36317	0.388799	0.654786	0.41285
2^-(ΔΔCt+SQ-STDev)		2.74963	1.18965	2.14842	0.908662	0.662246	15.0984	8.00934	9.7824	0.513094	0.121834	9.74743	0.541536	0.447701	0.462901
2^-(ΔΔCt-SQ-STDev)		3.03268	1.37812	2.72011	1.07809	1.06192	17.6634	10.7135	11.15	0.564164	0.185655	10.29	0.763765	0.63517	0.751138
Average Fold Change		2.89116	1.28388	2.43427	0.993377	0.862081	16.3809	9.36141	10.4662	0.538629	0.153744	10.0187	0.652651	0.541435	0.60702

## Sheet: 48h-cold
calculate	actin	BjuNAC073	BjuNAC240	BjuNAC241	BjuNAC112	BjuNAC184	BjuNAC083	BjuNAC223	BjuNAC006	BjuNAC074	BjuNAC295	BjuNAC170	BjuNAC178	BjuNAC146	BjuNAC268
	21.1533	26.8724	29.7039	27.2002	26.7236	27.1505	24.8625	25.615	29.7189	29.6626
	21.1833	26.6345	28.9389	27.2086	26.6922	27.0607	24.9667	25.7735	29.5668	29.5242
	21.1393	26.7733	29.1255	27.5757	27.8437	27.7014	25.1246	25.803	29.2778	29.8362
Ct average value	21.1586	26.7601	29.2561	27.3281	27.0865	27.3042	24.9846	25.7305	29.5212	29.6744
Δct		5.60143	8.09746	6.16952	5.92788	6.14555	3.82601	4.57186	8.36256	8.51573
STDev	0.0225294	0.119479	0.3989	0.214398	0.655958	0.34694	0.131965	0.101116	0.224085	0.15634
	21.0638										31.6643	26.6749	22.8605	26.3648	24.9247
	21.2235										32.6895	26.5134	22.8305	26.4361	24.8326
	21.182										31.1886	26.412	22.7933	26.5154	24.8415
Ct average value	21.1564										31.8474	26.5334	22.8281	26.4388	24.8663
Δct											10.691	5.377	1.6717	5.28235	3.70986
STDev	0.0828618										0.767037	0.132627	0.0336639	0.0753665	0.0507861
		BjuNAC073	BjuNAC240	BjuNAC241	BjuNAC112	BjuNAC184	BjuNAC083	BjuNAC223	BjuNAC006	BjuNAC074	BjuNAC295	BjuNAC170	BjuNAC178	BjuNAC146	BjuNAC268
Δct-0h		7.0238	8.3617	7.24041	5.53415	6.22448	5.06937	7.26383	10.2471	6.98475	8.13487	8.34927	0.517321	3.1645	1.64477
Δct-48h		5.60143	8.09746	6.16952	5.92788	6.14555	3.82601	4.57186	8.36256	8.51573	10.691	5.377	1.6717	5.28235	3.70986
STDev		0.119479	0.3989	0.214398	0.655958	0.34694	0.131965	0.101116	0.224085	0.15634	0.767037	0.132627	0.0336639	0.0753665	0.0507861
SQ-STDev		0.121584	0.399536	0.215578	0.656344	0.34767	0.133874	0.103595	0.225214	0.157955	0.7715	0.156384	0.089439	0.11201	0.097187
ΔΔCt		-1.42237	-0.264243	-1.07089	0.393723	-0.0789295	-1.24336	-2.69196	-1.88456	1.53097	2.55614	-2.97227	1.15438	2.11785	2.06509
ΔΔCt+(SQ-STDev)		-1.30079	0.135293	-0.855311	1.05007	0.268741	-1.10949	-2.58837	-1.65935	1.68893	3.32764	-2.81588	1.24382	2.22986	2.16228
ΔΔCt-(SQ-STDev)		-1.54396	-0.663778	-1.28647	-0.262622	-0.4266	-1.37724	-2.79556	-2.10977	1.37302	1.78464	-3.12865	1.06494	2.00584	1.9679
2^-(ΔΔCt+SQ-STDev)		2.46364	0.910485	1.80915	0.482946	0.830044	2.15769	6.01418	3.15873	0.310157	0.0996047	7.04151	0.422254	0.213179	0.223404
2^-(ΔΔCt-SQ-STDev)		2.91593	1.58423	2.4393	1.19966	1.34406	2.5977	6.943	4.31624	0.386083	0.290248	8.74618	0.477993	0.248989	0.255624
Average Fold Change		2.68978	1.24736	2.12422	0.841301	1.08705	2.3777	6.47859	3.73748	0.34812	0.194926	7.89384	0.450124	0.231084	0.239514

## Sheet: q-PCR  under hot stress
Average Fold Change	BjuNAC073	BjuNAC240	BjuNAC241	BjuNAC112	BjuNAC184	BjuNAC083	BjuNAC223	BjuNAC006	BjuNAC074	BjuNAC295	BjuNAC170	BjuNAC178	BjuNAC146	BjuNAC268
0h	1.00867	1.02582	1.02699	1.00389	1.00913	1.00405	1.03528	1.11262	1.01892	1.05105	1.02247	1.00515	1.00179	1.00878
6h	3.7862	1.22026	2.78375	3.36866	1.61039	12.8372	7.04236	0.977446	3.29303	1.59535	1.4766	1.94679	3.02792	3.12022
12h	3.92003	10.1905	2.44879	2.70241	2.43143	21.8298	10.8096	2.41524	3.17543	1.7623	4.19432	2.18288	2.43868	1.25197
24h	7.97562	4.16138	9.61763	6.06168	5.56141	19.1171	12.5438	7.47198	5.50845	0.936899	1.94451	1.47731	3.39784	3.02725
48h	6.59435	2.61305	6.01785	1.84465	3.40362	34.4898	13.5339	21.1035	3.83909	0.278767	9.14689	2.84209	5.61937	4.19682

## Sheet: 0h-hot
calculate	actin	BjuNAC073	BjuNAC240	BjuNAC241	BjuNAC112	BjuNAC184	BjuNAC083	BjuNAC223	BjuNAC006	BjuNAC074	BjuNAC295	BjuNAC170	BjuNAC178	BjuNAC146	BjuNAC268
	22.3179	29.7985	31.2873	29.2569	28.6542	28.9321	27.6733	30.9209		31.2654		30.2919	23.3289	25.9342	24.4853
	22.2611	29.5868	31.1603	29.41	28.8079	28.6823	27.5237	30.3604		31.7554		30.2598	23.2297	25.8893	24.1286
	22.3849	29.4417	30.6784	29.887	28.5921	28.5715	27.7476	30.2038		31.7202		29.7589	23.4924	26.0086	24.2572
Ct average value	22.3213	29.609	31.042	29.518	28.6847	28.7286	27.6482	30.495		31.5803		30.1035	23.3503	25.944	24.2904
Δct		7.28774	8.72068	7.19669	6.36344	6.40732	5.32691	8.17373		9.25904		7.78223	1.02905	3.62275	1.96908
STDev	0.0619846	0.179423	0.321236	0.328654	0.111078	0.184728	0.11401	0.377047		0.273273		0.298902	0.132624	0.0602068	0.180679
	22.4527								32.1256		31.6086
	23.0085								31.1786		31.486
	23.3105								31.2774		31.7774
Ct average value	22.9239								31.5272		31.624
Δct									8.6033		8.7001
STDev	0.435103								0.520542		0.146316
		BjuNAC073	BjuNAC240	BjuNAC241	BjuNAC112	BjuNAC184	BjuNAC083	BjuNAC223	BjuNAC006	BjuNAC074	BjuNAC295	BjuNAC170	BjuNAC178	BjuNAC146	BjuNAC268
Δct		7.28774	8.72068	7.19669	6.36344	6.40732	5.32691	8.17373	8.6033	9.25904	8.7001	7.78223	1.02905	3.62275	1.96908
STDev		0.179423	0.321236	0.328654	0.111078	0.184728	0.11401	0.377047	0.520542	0.273273	0.146316	0.298902	0.132624	0.0602068	0.180679
SQ-STDev		0.189829	0.327162	0.334448	0.127202	0.19485	0.129771	0.382108	0.678438	0.280214	0.459045	0.305261	0.146394	0.0864115	0.191016
ΔΔCt		0	0	0	0	0	0	0	0	0	0	0	0	0	0
ΔΔCt+(SQ-STDev)		0.189829	0.327162	0.334448	0.127202	0.19485	0.129771	0.382108	0.678438	0.280214	0.459045	0.305261	0.146394	0.0864115	0.191016
ΔΔCt-(SQ-STDev)		-0.189829	-0.327162	-0.334448	-0.127202	-0.19485	-0.129771	-0.382108	-0.678438	-0.280214	-0.459045	-0.305261	-0.146394	-0.0864115	-0.191016
2^-(ΔΔCt+SQ-STDev)		0.87671	0.797103	0.793087	0.915605	0.873664	0.913977	0.767315	0.624841	0.823469	0.727467	0.809296	0.903506	0.941863	0.875989
2^-(ΔΔCt-SQ-STDev)		1.14063	1.25454	1.26089	1.09217	1.14461	1.09412	1.30325	1.60041	1.21438	1.37463	1.23564	1.1068	1.06173	1.14157
Average Fold Change		1.00867	1.02582	1.02699	1.00389	1.00913	1.00405	1.03528	1.11262	1.01892	1.05105	1.02247	1.00515	1.00179	1.00878

## Sheet: 6h-hot
calculate	actin	BjuNAC073	BjuNAC240	BjuNAC241	BjuNAC112	BjuNAC184	BjuNAC083	BjuNAC223	BjuNAC006	BjuNAC074	BjuNAC295	BjuNAC170	BjuNAC178	BjuNAC146	BjuNAC268
	19.1541	24.6275	27.5785
	19.1029	24.5773	27.5258
	19.115	24.301	27.5697
Ct average value	19.124	24.5019	27.558
Δct		5.37792	8.43401
STDev	0.0267281	0.175847	0.0282313
	19.6112			25.4165	24.3685	25.6906	21.3412	25.1088	28.0954	27.1843	27.9261	26.9861	19.7948	21.6526	19.9594
	19.7171			25.2148	24.2105	25.0828	21.3443	25.1139	28.4475	27.2351	27.3633	26.7075	19.7161	21.7564	20.1974
	19.6048			25.4855	24.2013	25.4192	21.1934	24.8174	28.3366	27.1391	27.8186	26.9259	19.6367	21.6076	19.8035
Ct average value	19.6444			25.3722	24.2601	25.3975	21.293	25.0134	28.2932	27.1862	27.7027	26.8731	19.7159	21.6722	19.9868
Δct				5.72788	4.6157	5.75317	1.64861	5.36901	8.64879	7.5418	8.05831	7.22876	0.0714927	2.02783	0.342397
STDev	0.0630868			0.140654	0.0939701	0.304513	0.0862519	0.169766	0.180022	0.0480139	0.298802	0.146608	0.0790195	0.0763486	0.198393
		BjuNAC073	BjuNAC240	BjuNAC241	BjuNAC112	BjuNAC184	BjuNAC083	BjuNAC223	BjuNAC006	BjuNAC074	BjuNAC295	BjuNAC170	BjuNAC178	BjuNAC146	BjuNAC268
Δct-0		7.28774	8.72068	7.19669	6.36344	6.40732	5.32691	8.17373	8.6033	9.25904	8.7001	7.78223	1.02905	3.62275	1.96908
Δct		5.37792	8.43401	5.72788	4.6157	5.75317	1.64861	5.36901	8.64879	7.5418	8.05831	7.22876	0.0714927	2.02783	0.342397
STDev		0.175847	0.0282313	0.140654	0.0939701	0.304513	0.0862519	0.169766	0.180022	0.0480139	0.298802	0.146608	0.0790195	0.0763486	0.198393
SQ-STDev		0.177866	0.0388768	0.154155	0.113183	0.310979	0.106861	0.181109	0.190756	0.0792798	0.305389	0.159605	0.101114	0.0990406	0.208182
ΔΔCt		-1.90981	-0.28667	-1.46881	-1.74774	-0.654151	-3.67831	-2.80472	0.045486	-1.71724	-0.641793	-0.553468	-0.95756	-1.59493	-1.62668
ΔΔCt+(SQ-STDev)		-1.73195	-0.247793	-1.31466	-1.63456	-0.343172	-3.57145	-2.62361	0.236242	-1.63796	-0.336403	-0.393863	-0.856446	-1.49589	-1.4185
ΔΔCt-(SQ-STDev)		-2.08768	-0.325547	-1.62297	-1.86092	-0.96513	-3.78517	-2.98583	-0.14527	-1.79652	-0.947182	-0.713074	-1.05867	-1.69397	-1.83486
2^-(ΔΔCt+SQ-STDev)		3.32176	1.18739	2.48743	3.10492	1.26854	11.8881	6.16292	0.848954	3.11226	1.2626	1.31391	1.81057	2.82038	2.67307
2^-(ΔΔCt-SQ-STDev)		4.25064	1.25314	3.08008	3.63239	1.95224	13.7863	7.92181	1.10594	3.47381	1.9281	1.63929	2.08302	3.23545	3.56737
Average Fold Change		3.7862	1.22026	2.78375	3.36866	1.61039	12.8372	7.04236	0.977446	3.29303	1.59535	1.4766	1.94679	3.02792	3.12022

## Sheet: 12h-hot
calculate	actin	BjuNAC073	BjuNAC240	BjuNAC241	BjuNAC112	BjuNAC184	BjuNAC083	BjuNAC223	BjuNAC006	BjuNAC074	BjuNAC295	BjuNAC170	BjuNAC178	BjuNAC146	BjuNAC268
	20.7774	25.7906	25.9065	26.5528	25.6039	25.6049	21.3787	25.5805
	20.2223	25.9516	25.9075	26.5923	25.3276	25.7557	21.232	25.1355
	20.4966	25.7932	26.2048	26.4209	25.192	25.6	21.6466	25.1446
Ct average value	20.4988	25.8451	26.0063	26.522	25.3745	25.6535	21.4191	25.2869
Δct		5.34632	5.50746	6.02321	4.87573	5.15473	0.92031	4.78806
STDev	0.277564	0.0922259	0.171972	0.089732	0.209889	0.0884918	0.210267	0.254329
calculate	actin	BjuNAC073	BjuNAC240	BjuNAC241	BjuNAC112	BjuNAC184	BjuNAC083	BjuNAC223	BjuNAC006	BjuNAC074	BjuNAC295	BjuNAC170	BjuNAC178	BjuNAC146	BjuNAC268
	19.963								27.8822	28.4289	28.6331	26.0884	20.2876	22.7189	22.7602
	19.9403								27.2881	27.7356	28.0271	25.8541	20.1673	22.6012	22.0806
	20.914								28.1407	27.8747	28.0122	26.1172	20.1559	22.592	21.4301
Ct average value	20.2724								27.7703	28.013	28.2242	26.0199	20.2036	22.6373	22.0903
Δct									7.49788	7.74058	7.95172	5.74745	-0.0688187	2.3649	1.81786
STDev	0.555732								0.43717	0.366772	0.354263	0.144308	0.0729865	0.0707487	0.665089
		BjuNAC073	BjuNAC240	BjuNAC241	BjuNAC112	BjuNAC184	BjuNAC083	BjuNAC223	BjuNAC006	BjuNAC074	BjuNAC295	BjuNAC170	BjuNAC178	BjuNAC146	BjuNAC268
Δct-0		7.28774	8.72068	7.19669	6.36344	6.40732	5.32691	8.17373	8.6033	9.25904	8.7001	7.78223	1.02905	3.62275	1.96908
Δct		5.34632	5.40817	5.93391	4.97076	5.15473	0.92031	4.78806	7.49788	7.74058	7.95172	5.74745	-0.0688187	2.3649	1.81786
STDev		0.0922259	0.171972	0.089732	0.209889	0.0884918	0.210267	0.254329	0.43717	0.366772	0.354263	0.144308	0.0729865	0.0707487	0.665089
SQ-STDev		0.292485	0.326522	0.291708	0.347987	0.291329	0.348216	0.376464	0.707076	0.665853	0.45005	0.312837	0.287	0.286439	0.720684
ΔΔCt		-1.94142	-3.31251	-1.26277	-1.39268	-1.25259	-4.4066	-3.38567	-1.10542	-1.51846	-0.748376	-2.03478	-1.09787	-1.25785	-0.151216
ΔΔCt+(SQ-STDev)		-1.64893	-2.98599	-0.971066	-1.04469	-0.961262	-4.05839	-3.00921	-0.398342	-0.852607	-0.298327	-1.72195	-0.810872	-0.971413	0.569469
ΔΔCt-(SQ-STDev)		-2.2339	-3.63903	-1.55448	-1.74067	-1.54392	-4.75482	-3.76213	-1.81249	-2.18431	-1.19843	-2.34762	-1.38487	-1.54429	-0.8719
2^-(ΔΔCt+SQ-STDev)		3.13601	7.92269	1.96029	2.06293	1.94701	16.6608	8.05121	1.31799	1.80576	1.22972	3.29881	1.75427	1.96076	0.673865
2^-(ΔΔCt-SQ-STDev)		4.70405	12.4583	2.93728	3.3419	2.91586	26.9987	13.568	3.51249	4.5451	2.29489	5.08983	2.61149	2.91661	1.83007
Average Fold Change		3.92003	10.1905	2.44879	2.70241	2.43143	21.8298	10.8096	2.41524	3.17543	1.7623	4.19432	2.18288	2.43868	1.25197

[truncated: 3 more sheets: 24h-hot, 48h-hot, P-value]
